# Supplementary material for: Rh-catalyzed tunable defluorinative borylation
Source: Royal Society of Chemistry journal article supplement (doi:10.1039/d1cc02079j), 2021-01-01

## SUPPORTING INFORMATION

### Rh-Catalyzed Tunable Defluorinative Borylation

Fei Hao, <sup>a, b</sup> Xueyun Shang, <sup>a</sup> Zhenwei Liu, <sup>a</sup> He Zhang, <sup>\*b</sup> Jin-Hong Lin<sup>\*b, c</sup> and Ji-Chang Xiao<sup>\*b</sup>

<sup>a</sup>Shandong Provincial Key Laboratory of Molecular Engineering, Qilu University of Technology-  
Shandong Academy of Science, Ji'nan 250353, China

<sup>b</sup>Key laboratory of organofluorine chemistry, Shanghai Institute of Organic Chemistry, University of  
Chinese Academy of Sciences, Chinese Academy of Sciences, 345 Lingling Road, Shanghai 200032,  
China

<sup>c</sup>Department of Chemistry, Innovative Drug Research Center, Shanghai University, Shanghai 200444, P.  
R. China

E-mail: [zhanghe07@gmail.com](mailto:zhanghe07@gmail.com) (H. Zhang), [jlin@sioc.ac.cn](mailto:jlin@sioc.ac.cn) or [jlin@shu.edu.cn](mailto:jlin@shu.edu.cn) (J.-H. Lin),  
[jchxiao@sioc.ac.cn](mailto:jchxiao@sioc.ac.cn) (J.-C. Xiao)

#### Table of Contents

|                                                                                                                                                                                        |       |
|----------------------------------------------------------------------------------------------------------------------------------------------------------------------------------------|-------|
| 1. General Information .....                                                                                                                                                           | 2     |
| 2. Experimental Procedure for the Synthesis of Substrates.....                                                                                                                         | 2     |
| 3. The Optimization of Reaction Conditions.....                                                                                                                                        | 2-3   |
| 4. Experimental Procedure for Rh(I)-catalyzed Defluorinative Borylation to Allylborylated<br>Monofluoroalkene.....                                                                     | 4     |
| 5. Experimental Procedure for Rh(I)-catalyzed Defluorinative Borylation/Oxidation to 1,4-Dihydroxy<br>Monofluoroalkenes <b>2</b> ... ..                                                | 4-8   |
| 6. X-ray Structure of <b>2f</b> .....                                                                                                                                                  | 9     |
| 7. Experimental Procedure for Transformation of <b>2h'</b> / <b>2h''</b> to <b>2h'''</b> .....                                                                                         | 9     |
| 8. Experimental Procedure for Rh(I)-Catalyzed Dehydroxylative/Defluorinative Borylation to<br>Homoallylborylated Monofluoroalkenes <b>3</b> and the 2D NMR Spectrum of <b>3a</b> ..... | 10-18 |
| 9. Evidence for the Proposed Mechanism.....                                                                                                                                            | 19-21 |
| 10. <sup>1</sup> H NMR, <sup>19</sup> F NMR and <sup>13</sup> C NMR spectra.....                                                                                                       | 22-68 |

## 1. General Information

Reagents and solvents were obtained commercially and used without further purification unless indicated otherwise. Molecular sieves (4Å, powder) were dried under vacuum at 220 °C and stored in a glove box before use. Tetramethylsilane or residual proton signals of the deuterated solvents were used as internal standard for <sup>1</sup>H NMR, <sup>13</sup>C NMR and <sup>19</sup>F NMR spectra. Data for <sup>1</sup>H NMR, <sup>13</sup>C NMR and <sup>19</sup>F NMR were recorded as follows: chemical shift (δ, ppm), multiplicity (s = singlet, d = doublet, t = triplet, m = multiplet or unresolved, brs = broad singlet, coupling constant(s) in Hz, integration).

## 2. Experimental Procedure for the Synthesis of Substrates

Substrates **1a** - **1o** were synthesized using the method reported by Masayuki Kirihara *et al.* (Ref. *Tetrahedron* 2000, **56**, 8275), and the corresponding characterization data were the same as provided in our previous paper (Ref. *Org. Biomol. Chem.* 2014, **12**, 581-588). Substrate **1p** was synthesized using the method reported by Xingang Zhang *et al.* (Ref. *J. Am. Chem. Soc.* 2014, **136**, 1230-1233) and the corresponding characterization data were the same as provided in their paper.

**1o** is a new compound. The characterization data are shown as follows.

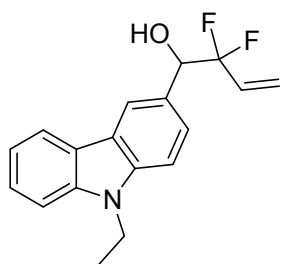

**1-(9-Ethyl-9H-carbazol-3-yl)-2,2-difluorobut-3-en-1-ol (1o)**. 67% yield; Yellow oil; <sup>1</sup>H NMR (300 MHz, CDCl<sub>3</sub>) δ 8.37 – 7.87 (m, 2H), 7.51 – 7.37 (m, 2H), 7.34 (d, *J* = 8.1 Hz, 1H), 7.28 – 7.10 (m, 2H), 5.98 – 5.76 (m, 1H), 5.57 (d, *J* = 17.4 Hz, 1H), 5.39 (d, *J* = 11.1 Hz, 1H), 4.99 (t, *J* = 9.9 Hz, 1H), 4.24 (q, *J* = 7.2 Hz, 2H), 2.82 (brs, 1H), 1.34 (t, *J* = 7.2 Hz, 3H); <sup>13</sup>C NMR (101 MHz, CDCl<sub>3</sub>) δ 140.1 (s), 139.9 (s), 129.7 (t, *J* = 25.7 Hz), 126.4 (s), 125.7 (s), 125.1 (s), 122.6 (s), 122.5 (s), 121.3 (t, *J* = 9.1 Hz), 120.4 (s), 119.8 (t, *J* = 244.3 Hz), 119.7 (s), 118.9 (s), 108.5 (s), 108.0 (s), 76.2 (t, *J* = 29.5 Hz), 37.4 (s), 13.6 (s); <sup>19</sup>F NMR (282 MHz, CDCl<sub>3</sub>) δ -107.26 – -109.41 (m, 2F); IR (neat) ν = 3413, 2988, 1599, 1492, 1472, 1332, 1233, 1066 cm<sup>-1</sup>; HRMS(EI) for C<sub>18</sub>H<sub>17</sub>F<sub>2</sub>NO [M]<sup>+</sup>: calcd. 301.1273, found 301.1281.

## 3. The Optimization of Reaction Conditions

In our previous Rh-catalyzed defluorination of allylic *gem*-difluorides, 1,4-dioxane and DMF were used as cosolvents (Ref. *Org. Biomol. Chem.* 2014, **12**, 581-588). We then first examined the defluorinative borylation of substrate **1a** in 1,4-dioxane and DMF, respectively (Table S1, entries 1-2). Two completely different borylation reactions were observed. In 1,4-dioxane, a dehydroxylative/defluorinative borylation occurred to provide homoallylborylated monofluoroalkene **3a** (entry 1). However, in DMF, the hydroxyl group remained intact and allylborylated monofluoroalkenes **2a'** and **2a''** were produced as major products (entry 2). Other reaction solvents cannot increase the yields of **2a'**/**2a''** or **3a** (entries 3-7), and some additives were then investigated (entries 8-14). The addition of a ligand, BINAP (entry 9) or 2,2'-bipyridine (entry 10), was not effective either. To our delight, the use of PPh<sub>3</sub> (0.2 equiv) as an additive significantly increased the yield of **3a** (entry 11). It seemed that 2 equiv of B<sub>2</sub>(pin)<sub>2</sub> has to be used for the

formation of **3a**, as evidenced by the dramatically lower yield with decreasing its loading (entry 12). We originally thought that 4Å MS would dry the reaction system and thus its presence might lead to an increase in the yield of **3a**. However, **3a** was completely suppressed and the reaction afforded **2a'/2a''** as products instead (entry 13). Without using PPh<sub>3</sub>, the yields of **2a'/2a''** were not decreased (entry 14). As can be seen from the results in entries 11, 13 and 14, two different paths were observed in the same reaction solvent, 1,4-dioxane. Apparently, it was 4Å MS that resulted in the **2a'/2a''** path. Since DMF was also found to favor the **2a'/2a''** path (entry 2), 4Å MS was used as an additive for the reaction in DMF. Indeed, the yields of **2a'/2a''** were further increased (entry 15). The reaction efficiency was not affected by shortening the reaction time to 70 min (entry 16).

**Table S1** The optimization of the reaction conditions<sup>a</sup>

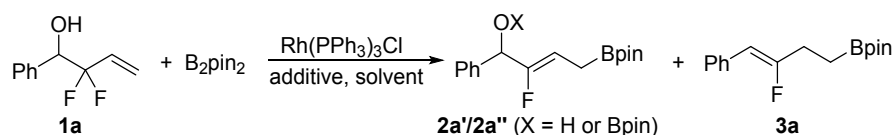

| entry               | additive (equiv)         | solvent            | yield (%) <sup>b</sup> |           |
|---------------------|--------------------------|--------------------|------------------------|-----------|
|                     |                          |                    | <b>2a'/2a''</b>        | <b>3a</b> |
| 1                   | -                        | dioxane            | trace                  | 52        |
| 2                   | -                        | DMF                | 72                     | ND        |
| 3                   | -                        | THF                | 5                      | 44        |
| 4                   | -                        | DCE                | ND                     | 14        |
| 5                   | -                        | CH <sub>3</sub> CN | ND                     | ND        |
| 6                   | -                        | DMAC               | trace                  | ND        |
| 7                   | -                        | toluene            | trace                  | 36        |
| 8                   | H <sub>2</sub> O (1)     | DMF                | 31                     | ND        |
| 9                   | BINAP (0.05)             | THF                | ND                     | 12        |
| 10 <sup>c</sup>     | 2,2'-bipy (0.05)         | THF                | 10                     | 14        |
| 11                  | PPh <sub>3</sub> (0.2)   | dioxane            | 4                      | 73        |
| 12 <sup>d</sup>     | PPh <sub>3</sub> (0.2)   | dioxane            | 2                      | 36        |
| 13 <sup>e</sup>     | 4Å MS + PPh <sub>3</sub> | dioxane            | 80                     | ND        |
| 14 <sup>f,g</sup>   | 4Å MS                    | dioxane            | 80                     | ND        |
| 15 <sup>f,h</sup>   | 4Å MS                    | DMF                | 86                     | ND        |
| 16 <sup>d,f,h</sup> | 4Å MS                    | DMF                | 87                     | ND        |

<sup>a</sup>Reaction conditions: **1a** (0.5 mmol), B<sub>2</sub>pin<sub>2</sub> (1.0 mmol), Rh(PPh<sub>3</sub>)<sub>3</sub>Cl (5 mol %) in solvent (2 mL) at 80 °C under a N<sub>2</sub> atmosphere for around 18 h; <sup>b</sup>The yields were determined by <sup>19</sup>F NMR spectroscopy; ND = Not Detected; <sup>c</sup>2,2'-bipy = 2,2'-bipyridine; <sup>d</sup>1.5 equiv of B<sub>2</sub>(pin)<sub>2</sub> was used; <sup>e</sup>4Å MS (100 mg) and PPh<sub>3</sub> (0.1 mmol) were used as additives; <sup>f</sup>100 mg of 4Å MS was used and the reaction temperature was 120 °C; <sup>g</sup>The reaction time was 0.5 h; <sup>h</sup>The reaction time was 70 min.

#### 4. Experimental Procedure for Rh(I)-catalyzed Defluorinative Borylation to Allylborylated Monofluoroalkene

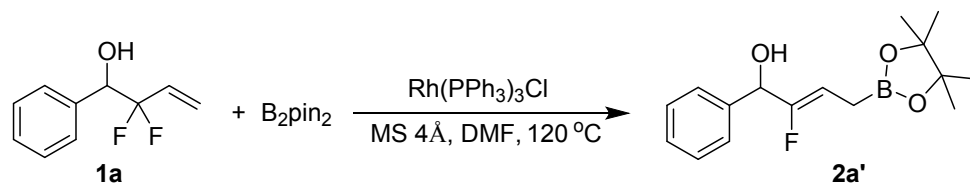

In a glove box, Rh(PPh<sub>3</sub>)<sub>3</sub>Cl (23.1 mg, 0.025 mmol), B<sub>2</sub>pin<sub>2</sub> (191 mg, 0.75 mmol), and 4 Å MS (100 mg) were added into a sealable tube. DMF (2 mL) and compound 1 (0.5 mmol) were then added to the mixture. The tube was sealed and the mixture was stirred at 120 °C for 70 min. The stereoselectivity was determined by <sup>19</sup>F NMR before the reaction was quenched with water (30 mL). The mixture was extracted with 50 mL Et<sub>2</sub>O. The Et<sub>2</sub>O solution was washed with brine (20 mL × 3), and then dried over anhydrous Na<sub>2</sub>SO<sub>4</sub>. The solvent was removed under reduced pressure and the residue was purified by flash column chromatography using PE/EtOAc as eluent.

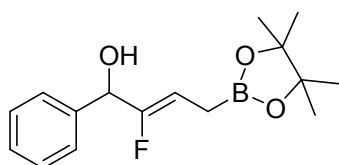

**(Z)-2-Fluoro-1-phenyl-4-(4,4,5,5-tetramethyl-1,3,2-dioxaborolan-2-yl)but-2-en-1-ol (2a')**. 40% yield; Colorless oil; <sup>1</sup>H NMR (400 MHz, DMF-d<sub>7</sub>) δ 7.49 (d, *J* = 7.2 Hz, 2H), 7.40 – 7.34 (m, 2H), 7.34 – 7.28 (m, 1H), 5.91 (d, *J* = 4.9 Hz, 1H), 5.27 – 5.06 (m, 2H), 1.62 (d, *J* = 7.9 Hz, 2H), 1.24 (s, 12H); <sup>13</sup>C NMR (101 MHz, DMF-d<sub>7</sub>) δ 159.8 (d, *J* = 254.9 Hz), 141.9 (s), 128.1 (s), 127.4 (s), 126.9 (s), 101.5 (d, *J* = 13.9 Hz), 83.3 (s), 71.6 (d, *J* = 31.5 Hz), 24.4 (s); <sup>19</sup>F NMR (376 MHz, DMF-d<sub>7</sub>) δ -124.05 (dd, *J* = 37.4, 14.2 Hz, 1F); IR (neat) ν = 3448, 2979, 1702, 1372, 1274, 1144, 967, 701 cm<sup>-1</sup>; HRMS(ESI) for C<sub>16</sub>H<sub>21</sub><sup>11</sup>BFO<sub>2</sub> [M-H<sub>2</sub>O+H]<sup>+</sup>: calcd. 275.1613, found 275.1614.

#### 5. Experimental Procedure for Rh(I)-catalyzed Defluorinative Borylation/Oxidation to 1,4-Dihydroxy Monofluoroalkenes

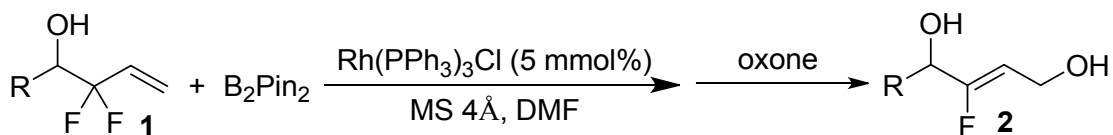

In a glove box, Rh(PPh<sub>3</sub>)<sub>3</sub>Cl (23.1 mg, 0.025 mmol), B<sub>2</sub>pin<sub>2</sub> (191 mg, 0.75 mmol), and 4 Å MS (100 mg) were added to a sealable tube. DMF (2 mL) and starting material 1 (0.5 mmol) were then added and the tube was sealed. The mixture was stirred at 120 °C for 70 min and then cooled to room temperature. Water (2 mL) and acetone (0.5 mL) were added, followed by Na<sub>2</sub>CO<sub>3</sub> (0.8 g, 7.5 mmol) and oxone (308 mg, 0.5 mmol). The mixture was stirred for another 15 min. Saturated aqueous NaHSO<sub>3</sub> solution (0.5 mL) was added and stirring was continued for another 30 min. The excellent stereoselectivity was observed by <sup>19</sup>F NMR (*Z/E* > 98 / 2). Water (30 mL) was added and the resulting mixture was then extracted with Et<sub>2</sub>O (30 mL × 3). The organic solutions were combined and dried over anhydrous Na<sub>2</sub>SO<sub>4</sub>.

After filtration, the solvent was removed under reduced pressure. The pure product **2** was obtained by flash column chromatography using PE/Acetone as eluent.

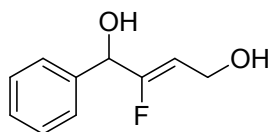

**(Z)-2-Fluoro-1-phenylbut-2-ene-1,4-diol (2a)**. 87% yield; Colorless oil;  $^1\text{H}$  NMR (400 MHz, acetone- $d_6$ )  $\delta$  7.46 (d,  $J = 7.3$  Hz, 2H), 7.41 – 7.25 (m, 3H), 5.37 – 5.16 (m, 2H), 5.04 (d,  $J = 4.8$  Hz, 1H), 4.20 – 4.14 (m, 2H), 3.89 (t,  $J = 5.5$  Hz, 1H);  $^{13}\text{C}$  NMR (101 MHz, acetone- $d_6$ )  $\delta$  160.1 (d,  $J = 259.2$  Hz), 140.8 (s), 128.1 (s), 127.7 (s), 126.8 (s), 106.6 (d,  $J = 11.3$  Hz), 71.5 (d,  $J = 31.9$  Hz), 54.3 (d,  $J = 7.0$  Hz);  $^{19}\text{F}$  NMR (376 MHz, acetone- $d_6$ )  $\delta$  -120.63 (dd,  $J = 37.2, 12.1$  Hz, 1F); IR (neat)  $\nu = 3229, 2881, 1708, 1455, 1333, 1060, 1011, 771$   $\text{cm}^{-1}$ ; HRMS(EI) for  $\text{C}_{10}\text{H}_{11}\text{FO}_2$   $[\text{M}]^+$ : calcd. 182.0743, found 182.0739.

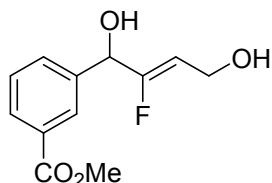

**(Z)-Methyl 3-(2-fluoro-1,4-dihydroxybut-2-en-1-yl)benzoate (2b)**. 85% yield; Colorless oil;  $^1\text{H}$  NMR (400 MHz, acetone- $d_6$ )  $\delta$  8.14 (s, 1H), 7.95 (d,  $J = 7.7$  Hz, 1H), 7.72 (d,  $J = 7.7$  Hz, 1H), 7.50 (t,  $J = 7.7$  Hz, 1H), 5.46 – 5.19 (m, 3H), 4.22 – 4.14 (m, 2H), 3.93 (t,  $J = 5.6$  Hz, 1H), 3.88 (s, 3H);  $^{13}\text{C}$  NMR (101 MHz, acetone- $d_6$ )  $\delta$  166.3 (s), 159.6 (d,  $J = 259.3$  Hz), 141.5 (s), 131.4 (s), 130.2 (s), 128.7 (s), 128.5 (s), 127.6 (s), 107.1 (d,  $J = 11.2$  Hz), 71.0 (d,  $J = 31.6$  Hz), 54.2 (d,  $J = 7.0$  Hz), 51.5 (s);  $^{19}\text{F}$  NMR (376 MHz, acetone- $d_6$ )  $\delta$  -121.36 (dd,  $J = 37.0, 13.0$  Hz, 1F); IR (neat)  $\nu = 3397, 2954, 1716, 1435, 1293, 1201, 1008, 758$   $\text{cm}^{-1}$ ; HRMS(EI) for  $\text{C}_{12}\text{H}_{13}\text{FO}_4$   $[\text{M}]^+$ : calcd. 240.0798, found 240.0795.

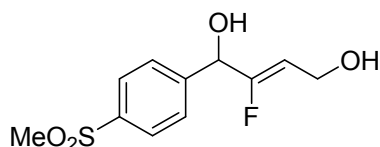

**(Z)-2-Fluoro-1-(4-(methylsulfonyl)phenyl)but-2-ene-1,4-diol (2c)**. 73% yield; Colorless oil;  $^1\text{H}$  NMR (400 MHz, acetone- $d_6$ )  $\delta$  7.95 (d,  $J = 8.4$  Hz, 2H), 7.74 (d,  $J = 8.4$  Hz, 2H), 5.47 – 5.24 (m, 3H), 4.17 (d,  $J = 5.9$  Hz, 2H), 3.93 (brs, 1H), 3.13 (s, 3H);  $^{13}\text{C}$  NMR (101 MHz, acetone- $d_6$ )  $\delta$  159.1 (d,  $J = 259.6$  Hz), 146.6 (s), 140.7 (s), 127.5 (s), 127.2 (s), 107.6 (d,  $J = 11.0$  Hz), 70.8 (d,  $J = 31.3$  Hz), 54.2 (d,  $J = 6.9$  Hz), 43.4 (s);  $^{19}\text{F}$  NMR (376 MHz, acetone- $d_6$ )  $\delta$  -121.81 (dd,  $J = 37.1, 13.7$  Hz, 1F); IR (neat)  $\nu = 3457, 2928, 1706, 1406, 1300, 1149, 1089, 771$   $\text{cm}^{-1}$ ; HRMS(ESI) for  $\text{C}_{11}\text{H}_{12}\text{FO}_4\text{S}$   $[\text{M}-\text{H}]^-$ : calcd. 259.04458, found 259.04480.

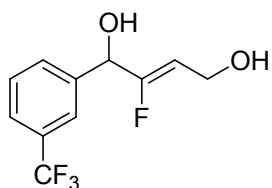

**(Z)-2-Fluoro-1-(3-(trifluoromethyl)phenyl)but-2-ene-1,4-diol (2d)**. 57% yield; Colorless oil;  $^1\text{H}$  NMR (400 MHz, acetone- $d_6$ )  $\delta$  7.82 (s, 1H), 7.76 (d,  $J = 7.5$  Hz, 1H), 7.69 – 7.57 (m,

2H), 5.46 – 5.22 (m, 3H), 4.24 – 4.12 (m, 2H), 3.87 (t,  $J = 5.7$  Hz, 1H);  $^{13}\text{C}$  NMR (101 MHz, acetone- $d_6$ )  $\delta$  159.4 (d,  $J = 259.4$  Hz), 142.3 (s), 1307 (s), 130.0 (q,  $J = 31.8$  Hz), 129.1 (s), 124.5 (q,  $J = 271.5$  Hz), 124.5 (q,  $J = 3.8$  Hz), 123.3 (q,  $J = 3.8$  Hz), 107.5 (d,  $J = 11.1$  Hz), 70.9 (d,  $J = 31.5$  Hz), 54.3 (d,  $J = 6.9$  Hz);  $^{19}\text{F}$  NMR (376 MHz, acetone- $d_6$ )  $\delta$  -63.05 (s, 3F), -122.03 (dd,  $J = 37.1, 13.5$  Hz, 1F); IR (neat)  $\nu = 3348, 2893, 1706, 1330, 1166, 1126, 1074$   $\text{cm}^{-1}$ ; LRMS(EI)  $\text{C}_{11}\text{H}_{10}\text{F}_4\text{O}_2$   $[\text{M}]^+$ : calcd. for 250.1, found 250.0; Anal. for  $\text{C}_{11}\text{H}_{10}\text{F}_4\text{O}_2$ : calcd. C 52.81, H 4.03, found C 52.85, H 3.93.

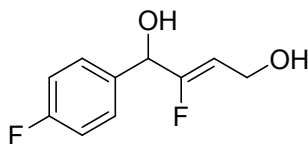

**(Z)-2-Fluoro-1-(4-fluorophenyl)but-2-ene-1,4-diol (2e).** 84% yield; Colorless solid;  $^1\text{H}$  NMR (400 MHz, acetone- $d_6$ )  $\delta$  7.58 – 7.34 (m, 2H), 7.21 – 7.01 (m, 2H), 5.35 – 5.18 (m, 2H), 5.14 (d,  $J = 4.8$  Hz, 1H), 4.21 – 4.12 (m, 2H), 3.92 (t,  $J = 5.5$  Hz, 1H);  $^{13}\text{C}$  NMR (101 MHz, acetone- $d_6$ )  $\delta$  162.3 (d,  $J = 243.8$  Hz), 159.9 (d,  $J = 259.2$  Hz), 137.0 (d,  $J = 3.1$  Hz), 128.7 (d,  $J = 8.3$  Hz), 114.8 (d,  $J = 21.5$  Hz), 106.8 (d,  $J = 11.2$  Hz), 70.8 (d,  $J = 31.9$  Hz), 54.3 (d,  $J = 7.1$  Hz);  $^{19}\text{F}$  NMR (376 MHz, acetone- $d_6$ )  $\delta$  -116.31 – 1116.43 (m, 1F), -121.03 (dd,  $J = 37.2, 12.1$  Hz, 1F); IR (neat)  $\nu = 3335, 1712, 1604, 1509, 1228, 1158, 840$   $\text{cm}^{-1}$ ; LRMS(EI) for  $\text{C}_{10}\text{H}_{10}\text{F}_2\text{O}_2$   $[\text{M}]^+$ : calcd. 200.1, found 200.1; Anal. for  $\text{C}_{10}\text{H}_{10}\text{F}_2\text{O}_2$ : calcd. C 60.00, H 5.04, found C 59.90, H 5.05.

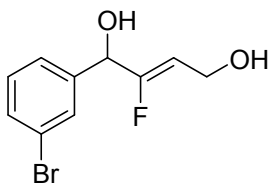

**(Z)-1-(3-Bromophenyl)-2-fluorobut-2-ene-1,4-diol (2g).** 64% yield; Colorless oil;  $^1\text{H}$  NMR (400 MHz, acetone- $d_6$ )  $\delta$  7.65 (s, 1H), 7.52 – 7.42 (m, 2H), 7.32 (t,  $J = 7.8$  Hz, 1H), 5.39 – 5.15 (m, 3H), 4.20 – 4.13 (m, 2H), 3.84 (t,  $J = 5.7$  Hz, 1H);  $^{13}\text{C}$  NMR (101 MHz, acetone- $d_6$ )  $\delta$  159.4 (d,  $J = 259.2$  Hz), 143.6 (s), 130.7 (s), 130.2 (s), 129.6 (s), 125.8 (s), 121.8 (s), 107.4 (d,  $J = 11.2$  Hz), 70.8 (d,  $J = 31.7$  Hz), 54.2 (d,  $J = 6.9$  Hz);  $^{19}\text{F}$  NMR (376 MHz, acetone- $d_6$ )  $\delta$  -121.77 (dd,  $J = 37.1, 13.1$  Hz, 1F); IR (neat)  $\nu = 3349, 2887, 1705, 1571, 1474, 1189, 999, 784$   $\text{cm}^{-1}$ ; HRMS(EI) for  $\text{C}_{10}\text{H}_{10}\text{FO}_2\text{Br}$   $[\text{M}]^+$ : calcd. 259.9848, found 259.9844.

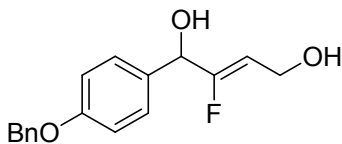

**(Z)-1-(4-(Benzyloxy)phenyl)-2-fluorobut-2-ene-1,4-diol (2h).** 72% yield; Colorless oil;  $^1\text{H}$  NMR (400 MHz, acetone- $d_6$ )  $\delta$  7.48 (d,  $J = 7.3$  Hz, 2H), 7.44 – 7.28 (m, 5H), 7.00 (d,  $J = 8.7$  Hz, 2H), 5.33 – 5.08 (m, 4H), 4.90 (d,  $J = 4.8$  Hz, 1H), 4.20 – 4.13 (m, 2H), 3.81 (t,  $J = 5.7$  Hz, 1H);  $^{13}\text{C}$  NMR (101 MHz, acetone- $d_6$ )  $\delta$  160.3 (d,  $J = 258.7$  Hz), 158.6 (s), 137.5 (s), 133.2 (s), 128.4 (s), 128.1 (s), 127.7 (s), 127.5 (s), 114.4 (s), 106.3 (d,  $J = 11.4$  Hz), 71.1 (d,  $J = 32.2$  Hz), 69.5 (s), 54.3 (d,  $J = 7.1$  Hz);  $^{19}\text{F}$  NMR (376 MHz, acetone- $d_6$ )  $\delta$  -120.43 (dd,  $J = 37.2, 11.3$  Hz, 1F); IR (neat)  $\nu = 3336, 2882, 1701, 1508, 1245, 1170, 1013, 744$   $\text{cm}^{-1}$ ; HRMS(ESI) for  $\text{C}_{17}\text{H}_{16}\text{FO}_3$   $[\text{M}-\text{H}]^-$ : calcd. 287.1089, found 287.1089.

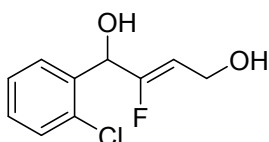

**(Z)-1-(2-Chlorophenyl)-2-fluorobut-2-ene-1,4-diol (2j).** 79% yield; White solid;  $^1\text{H}$  NMR (400 MHz, acetone- $d_6$ )  $\delta$  7.74 – 7.67 (m, 1H), 7.47 – 7.19 (m, 3H), 5.64 (dd,  $J$  = 11.2, 4.9 Hz, 1H), 5.28 (d,  $J$  = 4.9 Hz, 1H), 5.14 (dt,  $J$  = 37.0, 6.8 Hz, 1H), 4.21 – 4.13 (m, 2H), 3.91 (t,  $J$  = 5.5 Hz, 1H);  $^{13}\text{C}$  NMR (101 MHz, acetone- $d_6$ )  $\delta$  158.7 (d,  $J$  = 259.4 Hz), 138.0 (s), 132.5 (s), 129.4 (s), 129.2 (s), 128.7 (s), 127.1 (s), 107.8 (d,  $J$  = 11.5 Hz), 68.0 (d,  $J$  = 32.0 Hz), 54.3 (d,  $J$  = 7.0 Hz);  $^{19}\text{F}$  NMR (376 MHz, acetone- $d_6$ )  $\delta$  -120.66 (dd,  $J$  = 37.0, 11.2 Hz, 1F); IR (neat)  $\nu$  = 3346, 2889, 1706, 1473, 1443, 1237, 1007  $\text{cm}^{-1}$ ; LRMS(EI) for  $\text{C}_{10}\text{H}_{10}\text{ClFO}_2$   $[\text{M}]^+$ : calcd. 216.0, found 216.0; Anal. for  $\text{C}_{10}\text{H}_{10}\text{ClFO}_2$ : calcd. C 55.44, H 4.65, found C 55.56, H 4.68.

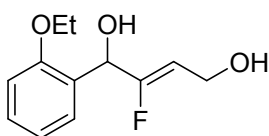

**(Z)-1-(2-Ethoxyphenyl)-2-fluorobut-2-ene-1,4-diol (2k).** 52% yield; Colorless oil;  $^1\text{H}$  NMR (400 MHz, acetone- $d_6$ )  $\delta$  7.51 (d,  $J$  = 7.2 Hz, 1H), 7.29-7.22 (m, 1H), 6.95 (t,  $J$  = 7.3 Hz, 2H), 5.60 (dd,  $J$  = 11.8, 5.3 Hz, 1H), 5.09 (dt,  $J$  = 37.1, 7.0 Hz, 1H), 4.73 (d,  $J$  = 5.3 Hz, 1H), 4.19 – 4.11 (m, 2H), 4.07 (q,  $J$  = 7.0 Hz, 2H), 3.71 (t,  $J$  = 5.7 Hz, 1H), 1.38 (t,  $J$  = 7.0 Hz, 3H);  $^{13}\text{C}$  NMR (101 MHz, acetone- $d_6$ )  $\delta$  159.9 (d,  $J$  = 259.4 Hz), 156.1 (s), 128.9 (d,  $J$  = 1.1 Hz), 128.8 (s), 127.5 (d,  $J$  = 0.7 Hz), 120.2 (s), 111.5 (s), 106.7 (d,  $J$  = 11.9 Hz), 65.7 (d,  $J$  = 31.9 Hz), 63.6 (s), 54.4 (d,  $J$  = 7.1 Hz), 14.2 (s);  $^{19}\text{F}$  NMR (376 MHz, acetone- $d_6$ )  $\delta$  -120.62 (dd,  $J$  = 37.0, 11.8 Hz, 1F); IR (neat)  $\nu$  = 3305, 2980, 1707, 1493, 1456, 1246, 1046, 757  $\text{cm}^{-1}$ ; LRMS(EI) for  $\text{C}_{12}\text{H}_{15}\text{FO}_3$   $[\text{M}]^+$ : calcd. 226.1, found 226.1; Anal. for  $\text{C}_{12}\text{H}_{15}\text{FO}_3$ : calcd. C 63.70, H 6.68, found C 63.63, H 6.61.

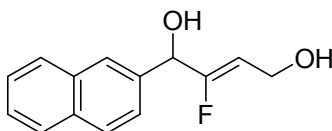

**(Z)-2-Fluoro-1-(naphthalen-2-yl)but-2-ene-1,4-diol (2l).** 67% yield; White solid;  $^1\text{H}$  NMR (400 MHz, acetone- $d_6$ )  $\delta$  7.99 (s, 1H), 7.93 – 7.83 (m, 3H), 7.63-7.58 (m, 1H), 7.56 – 7.44 (m, 2H), 5.47 – 5.26 (m, 2H), 5.21 (d,  $J$  = 4.8 Hz, 1H), 4.25 – 4.17 (m, 2H), 3.90 (t,  $J$  = 5.4 Hz, 1H);  $^{13}\text{C}$  NMR (101 MHz, acetone- $d_6$ )  $\delta$  160.0 (d,  $J$  = 259.2 Hz), 138.4 (s), 133.3 (s), 133.2 (s), 127.9 (s), 127.8 (s), 127.6 (s), 126.1 (s), 126.0 (s), 125.7 (s), 124.9 (s), 107.0 (d,  $J$  = 11.3 Hz), 71.6 (d,  $J$  = 31.9 Hz), 54.3 (d,  $J$  = 7.0 Hz);  $^{19}\text{F}$  NMR (376 MHz, acetone- $d_6$ )  $\delta$  -120.44 (dd,  $J$  = 37.1, 12.2 Hz, 1F); IR (neat)  $\nu$  = 3337, 3057, 1704, 1507, 1271, 1158, 1080, 817  $\text{cm}^{-1}$ ; LRMS(EI) for  $\text{C}_{14}\text{H}_{13}\text{FO}_2$   $[\text{M}]^+$ : calcd. 232.1, found 232.1; Anal. for  $\text{C}_{14}\text{H}_{13}\text{FO}_2$ : calcd. C 72.40, H 5.64, found C 72.37, H 5.73.

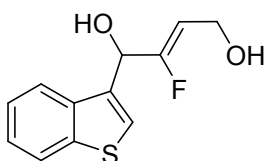

**(Z)-1-(Benzo[b]thiophen-3-yl)-2-fluorobut-2-ene-1,4-diol (2m).** 54% yield; Colorless oil;  $^1\text{H}$  NMR (400 MHz, acetone- $d_6$ )  $\delta$  8.05 – 7.99 (m, 1H), 7.98 – 7.90 (m, 1H), 7.67 (s, 1H), 7.42 – 7.34 (m, 2H), 5.67 (dd,  $J$  = 12.0, 4.6 Hz, 1H), 5.38 (dt,  $J$  = 37.0, 6.9 Hz, 1H), 5.22 (d,  $J$  = 5.1 Hz, 1H), 4.22 (br, 2H), 3.89 (br, 1H);  $^{13}\text{C}$  NMR (101 MHz, acetone- $d_6$ )  $\delta$  159.1 (d,  $J$  = 259.7 Hz), 140.6 (s),

137.6 (s), 135.6 (s), 124.4 (s), 124.0 (s), 122.9 (s), 122.7 (s), 107.5 (d,  $J = 11.4$  Hz), 67.5 (d,  $J = 32.5$  Hz), 54.4 (d,  $J = 6.9$  Hz);  $^{19}\text{F}$  NMR (376 MHz, acetone- $d_6$ )  $\delta$  -119.81 (dd,  $J = 37.0, 12.1$  Hz, 1F); IR (neat)  $\nu = 3346, 1705, 1460, 1428, 1245, 1155, 1079, 761$   $\text{cm}^{-1}$ ; HRMS(EI) for  $\text{C}_{12}\text{H}_{11}\text{FO}_2\text{S}$   $[\text{M}]^+$ : calcd. 288.0464, found 288.0463.

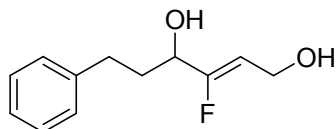

**(Z)-3-Fluoro-6-phenylhex-2-ene-1,4-diol (2n).** 60% yield; Colorless oil;  $^1\text{H}$  NMR (400 MHz, acetone- $d_6$ )  $\delta$  7.31 – 7.13 (m, 5H), 5.13 (dt,  $J = 37.9, 6.9$  Hz, 1H), 4.44 (d,  $J = 5.5$  Hz, 1H), 4.20 – 4.03 (m, 3H), 3.73 (t,  $J = 5.7$  Hz, 1H), 2.83 – 2.60 (m, 2H), 2.01 – 1.77 (m, 2H);  $^{13}\text{C}$  NMR (101 MHz, acetone- $d_6$ )  $\delta$  161.0 (d,  $J = 259.9$  Hz), 142.0 (s), 128.4 (s), 128.3 (s), 125.8 (s), 106.1 (d,  $J = 11.6$  Hz), 68.6 (d,  $J = 30.9$  Hz), 54.3 (d,  $J = 7.5$  Hz), 36.0 (s), 31.3 (s);  $^{19}\text{F}$  NMR (376 MHz, acetone- $d_6$ )  $\delta$  -123.10 (dd,  $J = 37.9, 13.5$  Hz, 1F); IR (neat)  $\nu = 3358, 2950, 1705, 1454, 1297, 1088, 1009, 748$   $\text{cm}^{-1}$ ; HRMS(EI) for  $\text{C}_{12}\text{H}_{15}\text{FO}_2$   $[\text{M}]^+$ : calcd. 210.1056, found 210.1053.

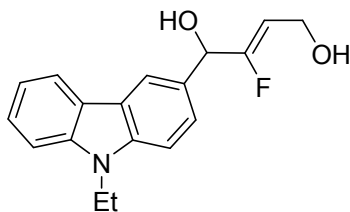

**(Z)-1-(9-Ethyl-9H-carbazol-3-yl)-2-fluorobut-2-ene-1,4-diol (2o).** 50% yield; Yellow oil;  $^1\text{H}$  NMR (400 MHz, DMSO- $d_6$ )  $\delta$  8.39 – 8.13 (m, 2H), 7.68 – 7.38 (m, 4H), 7.20 (t,  $J = 7.4$  Hz, 1H), 6.01 (d,  $J = 4.7$  Hz, 1H), 5.41 – 5.07 (m, 2H), 4.78 (t,  $J = 5.5$  Hz, 1H), 4.42 (q,  $J = 6.8$  Hz, 2H), 4.12 – 4.03 (m, 2H), 1.30 (t,  $J = 7.0$  Hz, 3H);  $^{13}\text{C}$  NMR (101 MHz, DMSO- $d_6$ )  $\delta$  160.3 (d,  $J = 258.6$  Hz), 139.9 (s), 139.2 (s), 131.6 (s), 125.7 (s), 124.8 (s), 122.1 (s), 121.8 (s), 120.3 (s), 118.8 (s), 118.7 (s), 109.1 (s), 108.7 (s), 106.4 (d,  $J = 11.5$  Hz), 71.1 (d,  $J = 31.2$  Hz), 53.7 (d,  $J = 6.7$  Hz), 37.0 (s), 13.7 (s);  $^{19}\text{F}$  NMR (376 MHz, DMSO- $d_6$ )  $\delta$  -118.84 (dd,  $J = 38.2, 11.7$  Hz, 1F); IR (neat)  $\nu = 3363, 1704, 1601, 1491, 1471, 1331, 1233, 748$   $\text{cm}^{-1}$ ; HRMS(ESI) for  $\text{C}_{18}\text{H}_{17}\text{FO}_2\text{N}$   $[\text{M}-\text{H}]^-$ : calcd. 298.12488, found 298.12497.

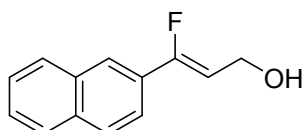

**(Z)-3-fluoro-3-(naphthalen-2-yl)prop-2-en-1-ol (2p).** 73% yield; White solid;  $^1\text{H}$  NMR (400 MHz,  $\text{CDCl}_3$ )  $\delta$  8.02 (s, 1H), 7.89 – 7.70 (m, 3H), 7.62 – 7.39 (m, 3H), 5.79 (dt,  $J = 36.7, 6.9$  Hz, 1H), 4.51 (d,  $J = 6.8$  Hz, 2H), 1.63 (brs, 1H);  $^{13}\text{C}$  NMR (101 MHz,  $\text{CDCl}_3$ )  $\delta$  158.2 (d,  $J = 250.8$  Hz), 133.7 (s), 133.1 (s), 129.0 (d,  $J = 28.1$  Hz), 128.7 (s), 128.5 (d,  $J = 2.3$  Hz), 127.8 (s), 127.0 (s), 126.8 (s), 124.0 (d,  $J = 7.4$  Hz), 121.9 (d,  $J = 6.8$  Hz), 105.5 (d,  $J = 15.3$  Hz), 56.3 (d,  $J = 7.9$  Hz);  $^{19}\text{F}$  NMR (376 MHz,  $\text{CDCl}_3$ )  $\delta$  -117.49 (d,  $J = 36.6$  Hz, 1F); GCMS (EI) for  $\text{C}_{13}\text{H}_{11}\text{FO}^+$   $[\text{M}]^+$  calcd.: 202.1, found: 202.1.



## 6. X-ray Structure of 2f

CCDC 929444

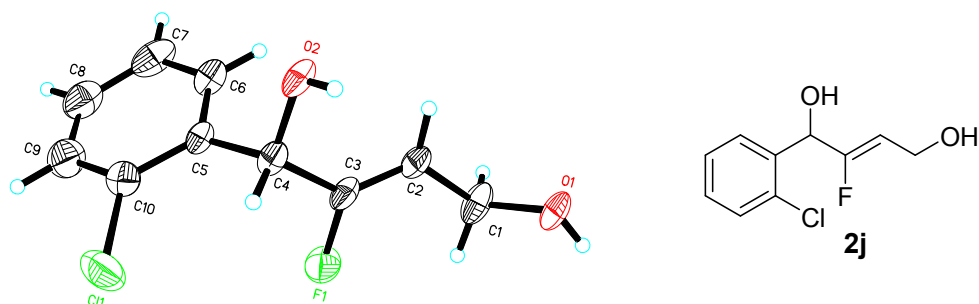

## 7. Experimental Procedure for Transformation of 2h'/2h'' to 2h'''

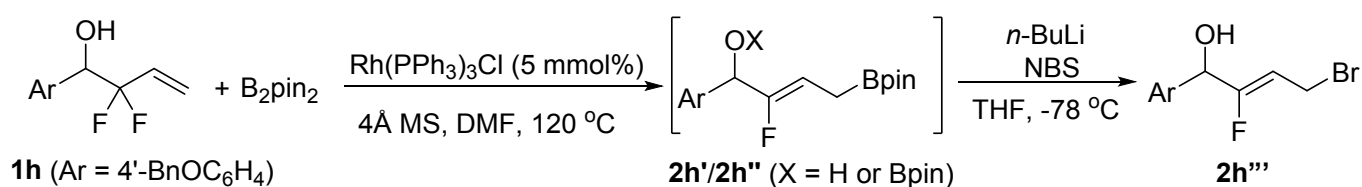

In a glove box,  $\text{Rh}(\text{PPh}_3)_3\text{Cl}$  (23.1 mg, 0.025 mmol),  $\text{B}_2\text{pin}_2$  (191 mg, 0.75 mmol) and 4Å MS (100 mg) were added into a sealable tube. DMF (2 mL) and compound **1h** (0.5 mmol) were then added and the tube was sealed. The mixture was stirred at 120 °C for 70 min and then cooled to room temperature. Water (30 mL) was added and the resulting mixture was extracted with  $\text{Et}_2\text{O}$  (30 mL  $\times$  3). The organic solutions were combined and dried over  $\text{Na}_2\text{SO}_4$ . After filtration, the solvent was removed under reduced pressure and **2h'/2h''** mixture was obtained. The transformation of Bpin moiety to Br group was performed following the procedure reported by Feng-Ling Qing *et al.* (Ref. *ACS Catal.* 2019, **9**, 5726–5731). Under  $\text{N}_2$ ,  $n\text{-BuLi}$  (0.25 mL, 2.4 M in hexanes, 0.60 mmol) was added dropwise to a solution of 1-bromo-3,5-bis(trifluoromethyl)benzene (175.8 mg, 0.6 mmol) in THF (2.0 mL) at -78 °C. The mixture was stirred at -78 °C for 1 h, and then a solution of **2h'/2h''** mixture in THF (1.0 mL) was added. The mixture was stirred at -78 °C for 30 min. Next, *N*-bromosuccinimide (106.8 mg, 0.6 mmol) was added at -78 °C. The reaction mixture was stirred at -78 °C for 5 min, and then it was warmed to room temperature and stirred for 1 h.  $\text{Na}_2\text{SO}_3$  (aq, 10.0 mL) was added, and the reaction mixture was extracted with  $\text{Et}_2\text{O}$ . The combined organic phases were dried over  $\text{MgSO}_4$  and concentrated. The pure product **2h'''** was obtained by flash column chromatography using hexane/ $\text{EtOAc}$  as eluent.

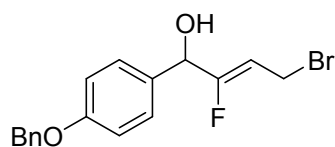

**(Z)-1-(4-(benzyloxy)phenyl)-4-bromo-2-fluorobut-2-en-1-ol (5h).** 42% yield; Colorless oil;  $^1\text{H}$  NMR (400 MHz,  $\text{CDCl}_3$ )  $\delta$  7.46 – 7.31 (m, 7H), 6.99 (d,  $J$  = 8.7 Hz, 2H), 5.42 (dt,  $J$  = 33.1, 8.6 Hz, 1H), 5.19 (d,  $J$  = 8.6 Hz, 1H), 5.08 (s, 2H), 4.05 (d,  $J$  = 8.9 Hz, 2H), 1.31 (d,  $J$  = 19.4 Hz, 1H);  $^{13}\text{C}$  NMR (101 MHz,  $\text{CDCl}_3$ )  $\delta$  162.2 (d,  $J$  = 265.6 Hz), 159.3 (s), 136.9 (s), 131.3 (s), 128.8 (s), 128.4 (s), 128.2 (s), 127.6 (s), 115.3 (s), 104.1 (d,  $J$  = 10.8 Hz), 71.9 (d,  $J$  = 32.6 Hz), 70.2 (s), 22.9 (d,  $J$  = 8.1 Hz);  $^{19}\text{F}$  NMR (376 MHz,  $\text{CDCl}_3$ )  $\delta$  -114.87 (dd,  $J$  = 32.9, 8.5 Hz, 1F); HRMS(DART) for  $\text{C}_{17}\text{H}_{20}\text{BrFNO}_2$   $[\text{M}+\text{NH}_4]^+$ : calcd. 368.0661, found 368.0656.

## 8. Experimental Procedure for Rh(I)-Catalyzed Dehydroxylative/Defluorinative Borylation to Homoallylborylated Monofluoroalkenes and the 2D NMR Spectrum of **3a**

In a glove box, Rh(PPh<sub>3</sub>)<sub>3</sub>Cl (23.1 mg, 0.025 mmol), B<sub>2</sub>pin<sub>2</sub> (254 mg, 1.0 mmol) and PPh<sub>3</sub> (26.2 mg, 0.1 mmol) were added to a sealable tube. Dioxane (2 mL) and compound **1** (78 μL, 0.5 mmol) were then added and the tube was sealed. The mixture was stirred at 80 °C for 18 h and then cooled to room temperature. Water (30 mL) was added and the resulting mixture was extracted with Et<sub>2</sub>O (30 mL ×3). The organic solutions were combined and dried over anhydrous Na<sub>2</sub>SO<sub>4</sub>. After filtration, the solvent was removed under reduced pressure. The product **3** was obtained by flash column chromatography using Et<sub>2</sub>O/hexane as eluent.

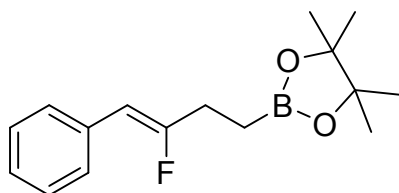

**(Z)-2-(3-Fluoro-4-phenylbut-3-en-1-yl)-4,4,5,5-tetramethyl-1,3,2-dioxaborolane(3a)**. 67% yield; Colorless liquid; <sup>1</sup>H NMR (300 MHz, CDCl<sub>3</sub>) δ 7.36 (d, *J* = 7.6 Hz, 2H), 7.19 (t, *J* = 7.6 Hz, 2H), 7.07 (t, *J* = 7.6 Hz, 1H), 5.37 (d, *J* = 39.6 Hz, 1H), 2.36 (dt, *J* = 15.6, 7.8 Hz, 2H), 1.14 (s, 12H), 0.99 (t, *J* = 7.8 Hz, 2H); <sup>13</sup>C NMR (101 MHz, CDCl<sub>3</sub>) δ 162.4 (d, *J* = 266.6 Hz), 133.9 (d, *J* = 2.4 Hz), 128.2 (s), 128.1 (s), 126.4 (d, *J* = 2.0 Hz), 104.6 (d, *J* = 8.8 Hz), 83.2 (s), 27.3 (d, *J* = 27.4 Hz), 24.7 (s); <sup>19</sup>F NMR (282 MHz, CDCl<sub>3</sub>) δ -100.97 (dt, *J* = 39.6, 15.6 Hz, 1F); IR (neat) ν = 2978, 2926, 1691, 1379, 1325, 1144, 968, 694 cm<sup>-1</sup>; HRMS(EI) for C<sub>16</sub>H<sub>22</sub>FO<sub>2</sub><sup>11</sup>B [M]<sup>+</sup>: calcd. 276.1697, found 276.1696.

COSY

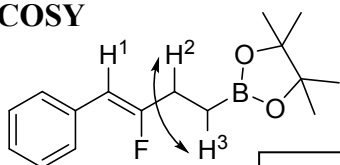

H<sup>1</sup> H<sup>2</sup> H<sup>3</sup>

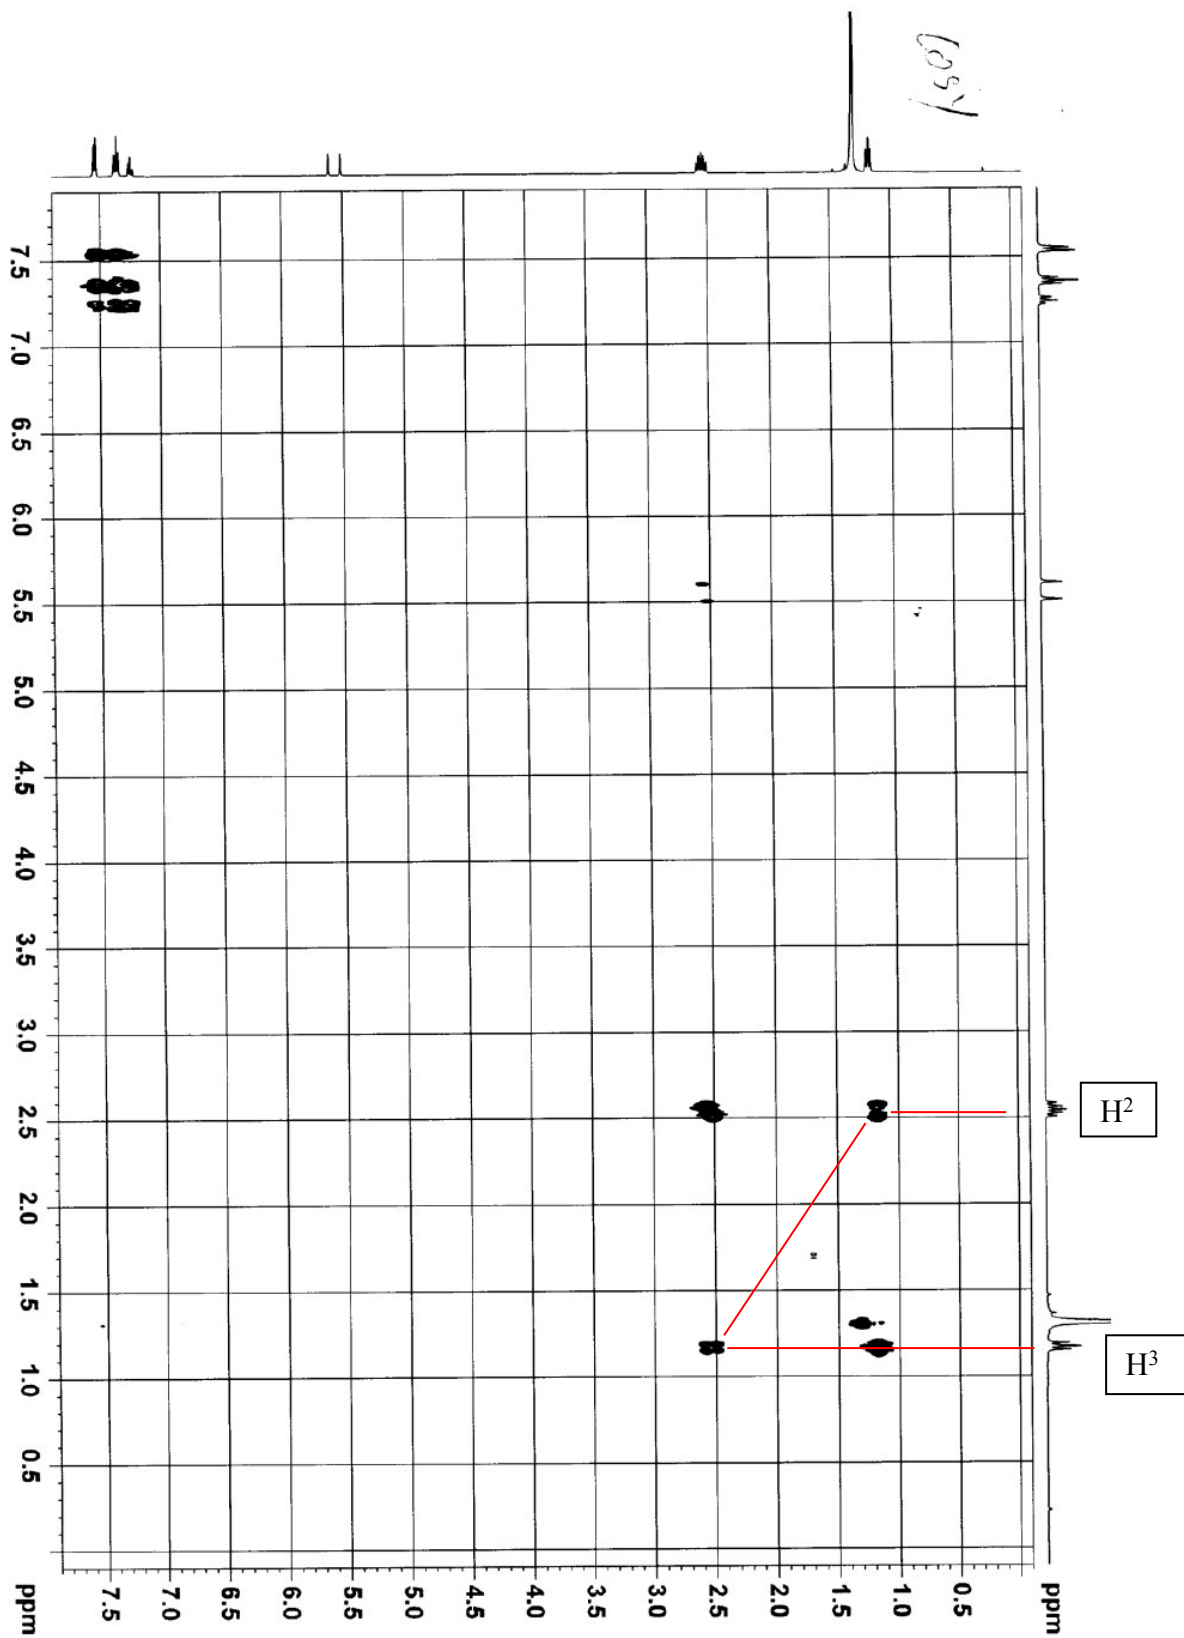

NOESY

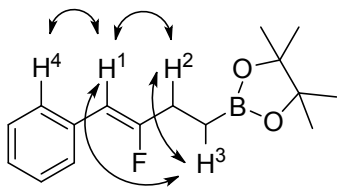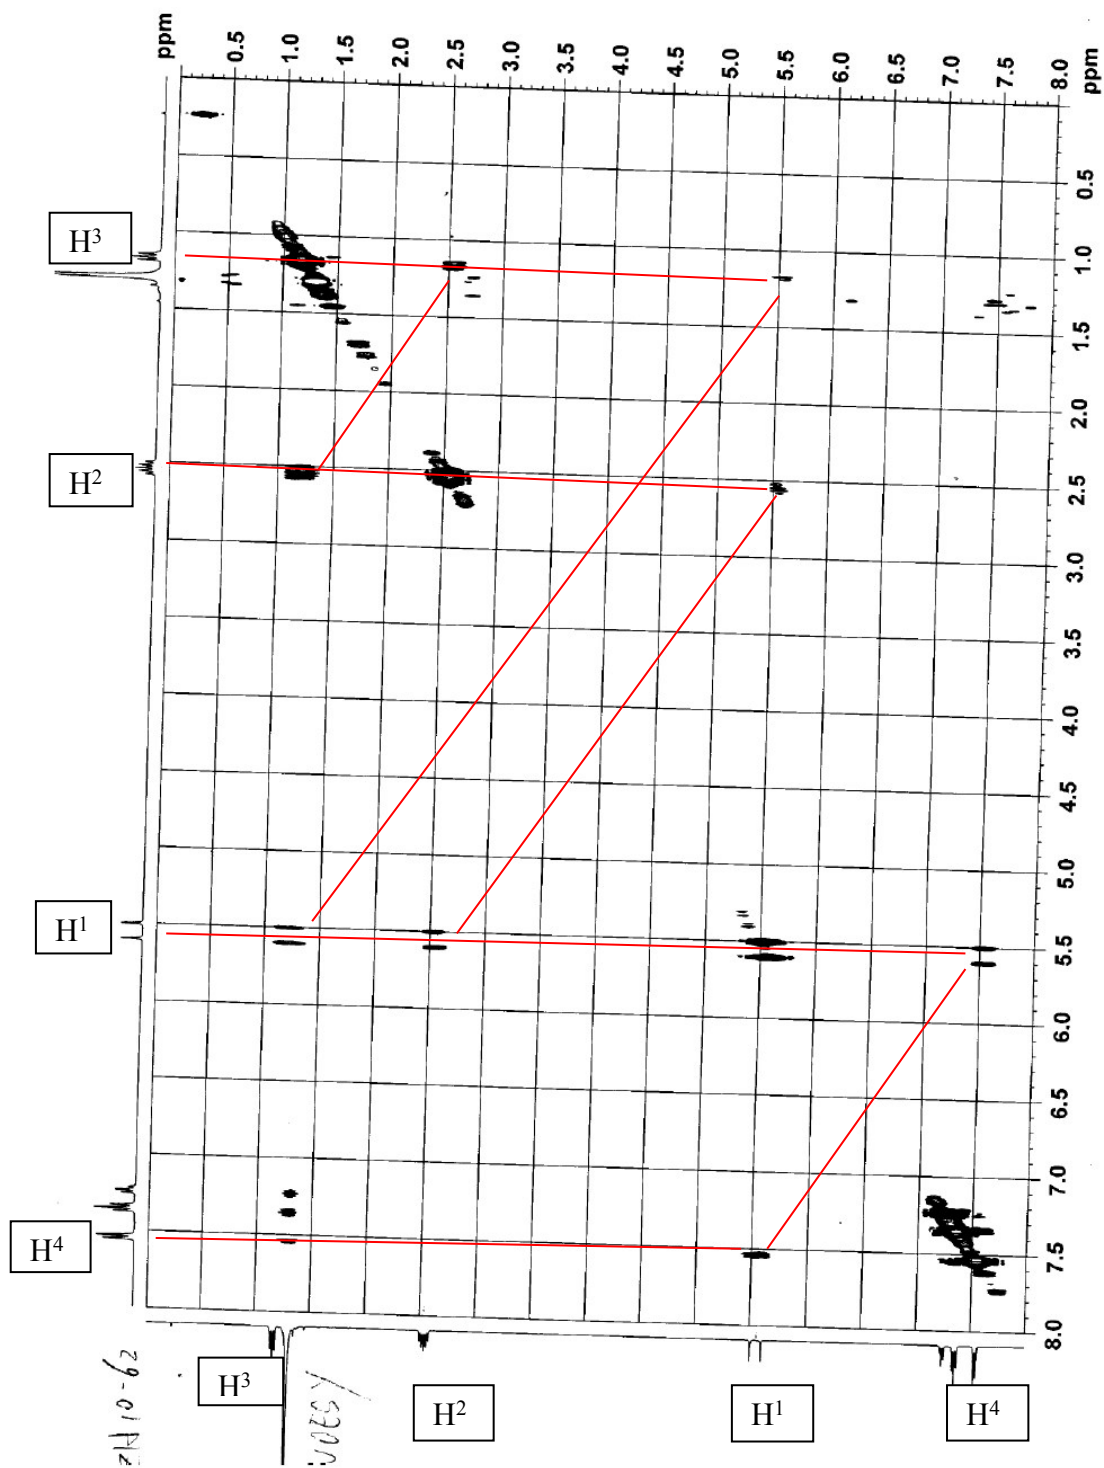

# HMQC

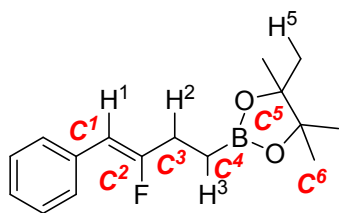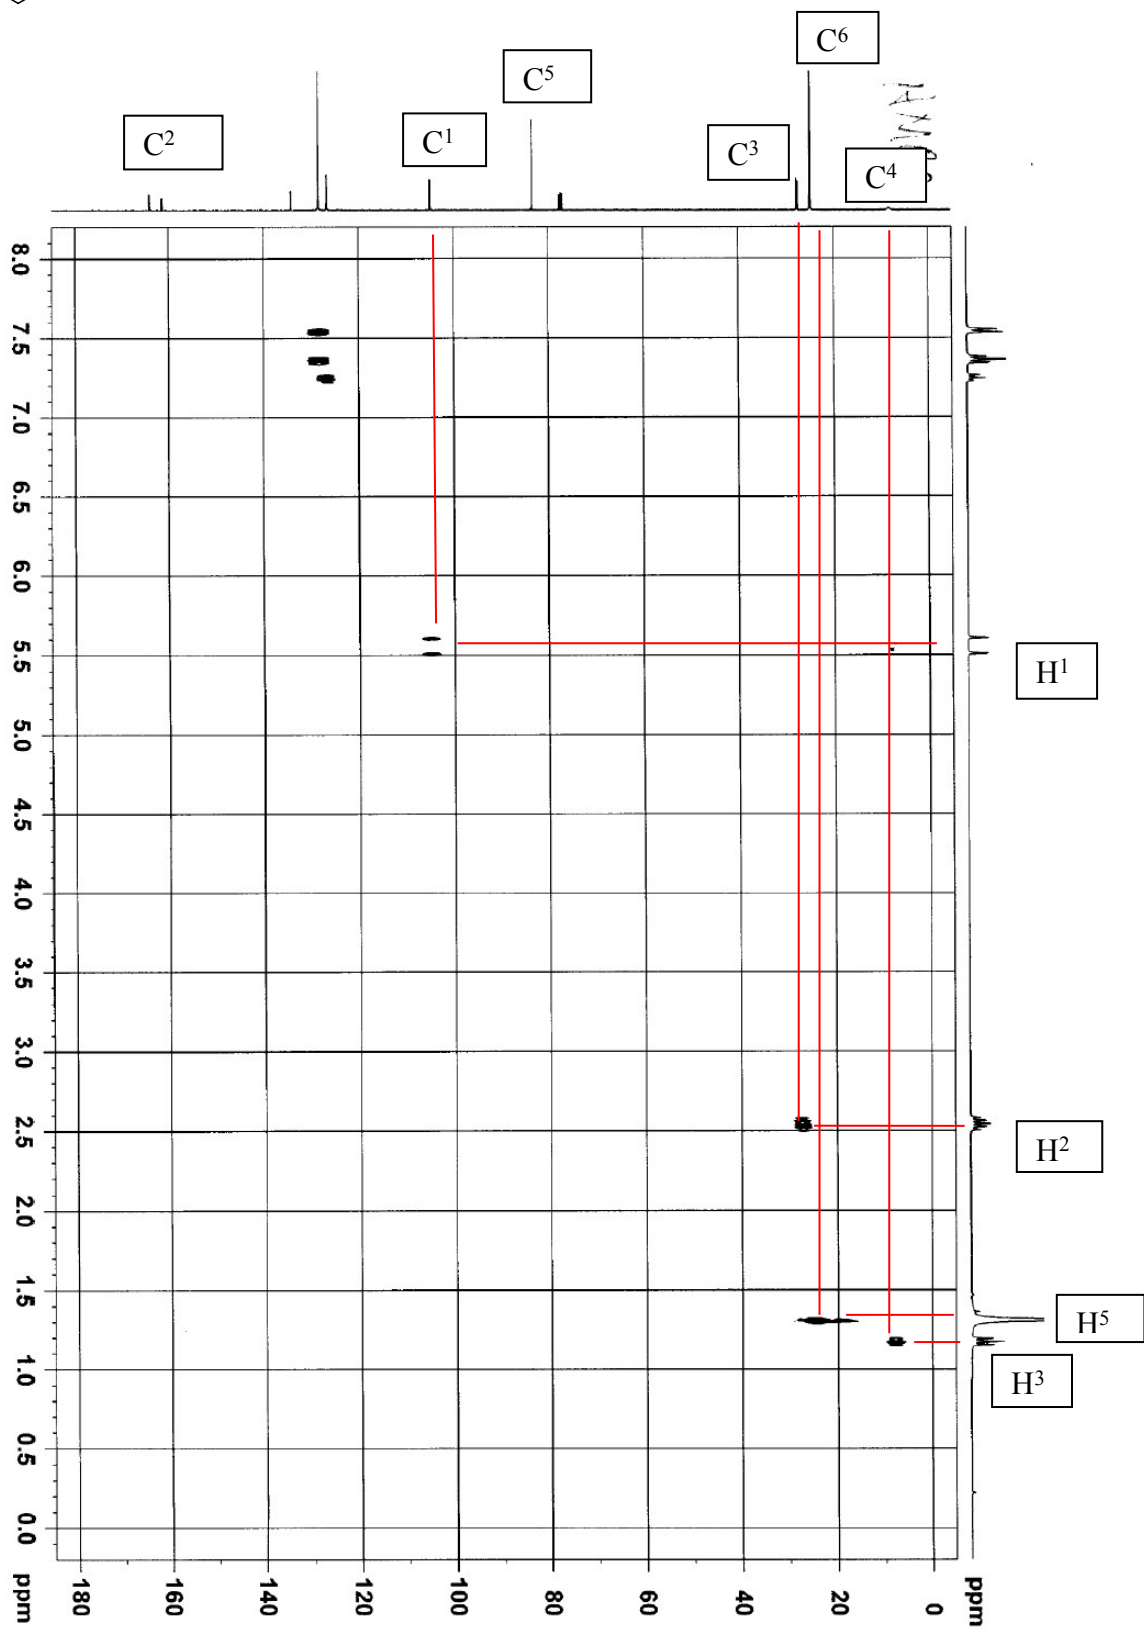

# HMBC

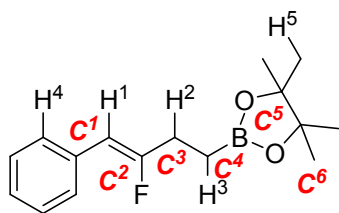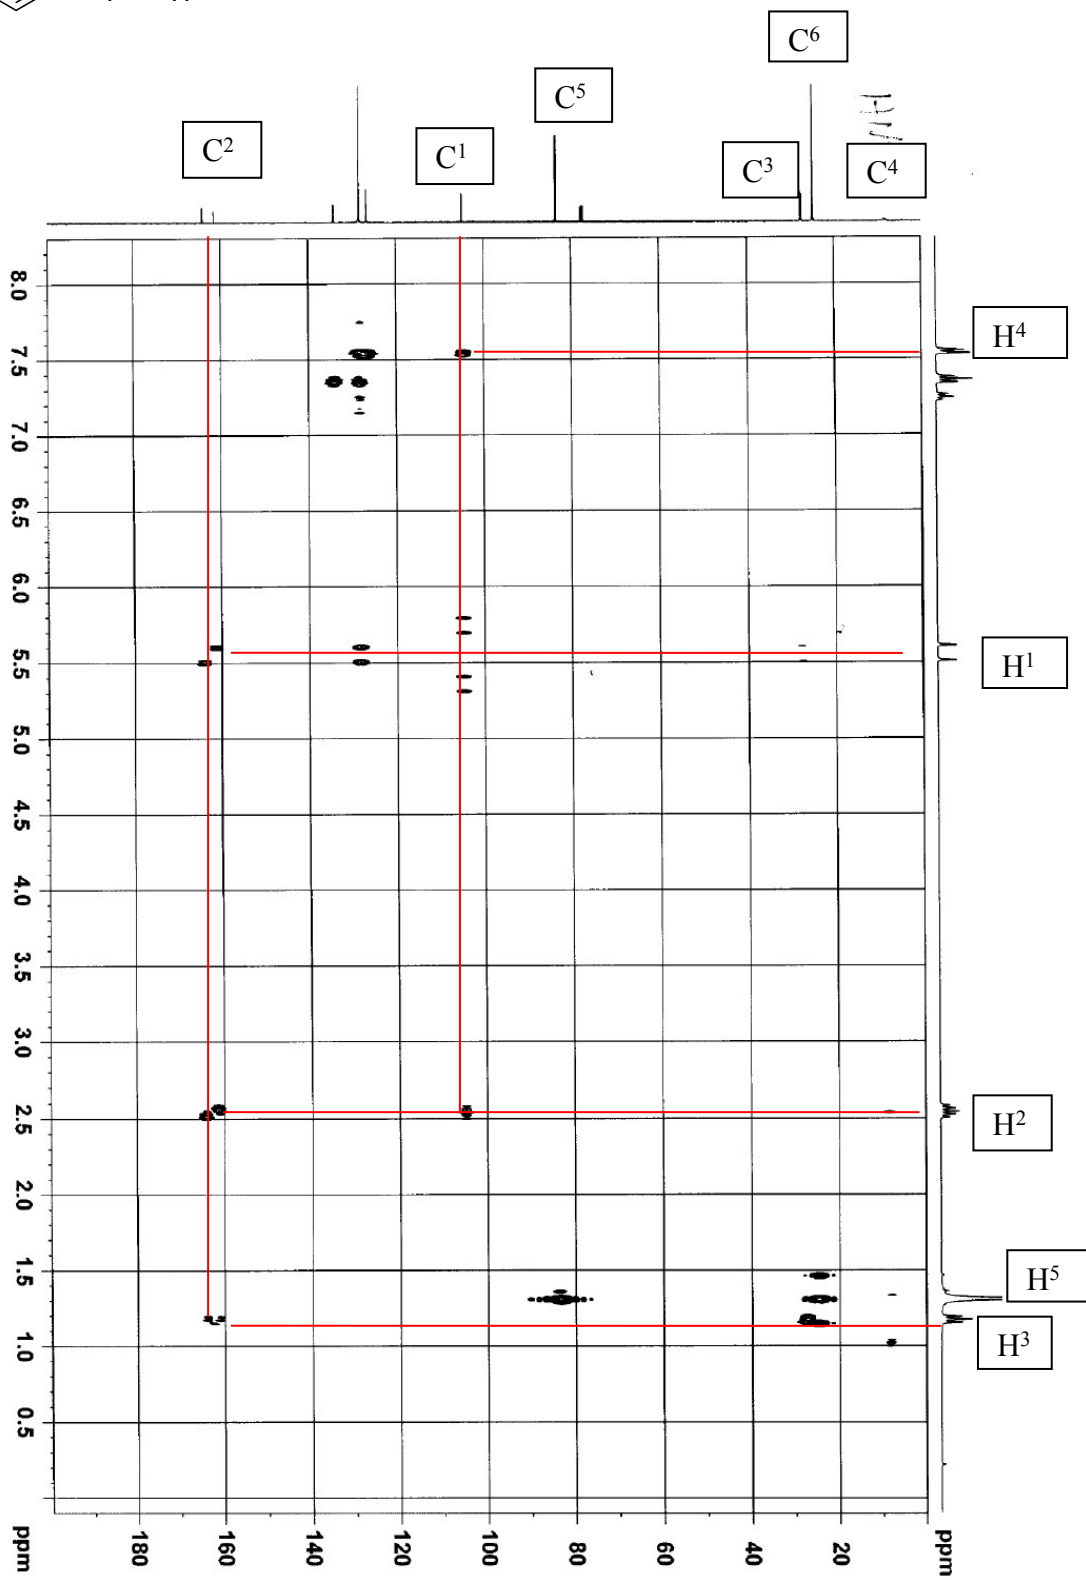

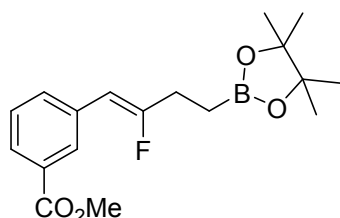

**(Z)-Methyl 3-(2-fluoro-4-(4,4,5,5-tetramethyl-1,3,2-dioxaborolan-2-yl)but-1-en-1-yl)benzoate (3b).** 73% yield; Colorless liquid;  $^1\text{H NMR}$  (400 MHz,  $\text{CDCl}_3$ )  $\delta$  8.08 (s, 1H), 7.85 (d,  $J = 7.8$  Hz, 1H), 7.68 (d,  $J = 7.8$  Hz, 1H), 7.37 (t,  $J = 7.8$  Hz, 1H), 5.52 (d,  $J = 38.9$  Hz, 1H), 3.91 (s, 3H), 2.46 (dt,  $J = 15.8, 7.8$  Hz, 2H), 1.25 (s, 12H), 1.09 (t,  $J = 7.8$  Hz, 2H);  $^{13}\text{C NMR}$  (101 MHz,  $\text{CDCl}_3$ )  $\delta$  167.1 (s), 163.4 (d,  $J = 268.1$  Hz), 134.2 (d,  $J = 2.3$  Hz), 132.5 (d,  $J = 8.3$  Hz), 130.2 (s), 129.3 (d,  $J = 6.6$  Hz), 128.4 (s), 127.5 (d,  $J = 2.0$  Hz), 104.0 (d,  $J = 8.6$  Hz), 83.3 (s), 52.1 (s), 27.4 (d,  $J = 27.2$  Hz), 24.8 (s);  $^{19}\text{F NMR}$  (376 MHz,  $\text{CDCl}_3$ )  $\delta$  -99.13 (dt,  $J = 38.9, 15.8$  Hz, 1F); IR (neat)  $\nu = 2978, 2928, 1687, 1407, 1380, 1308, 1150, 966$   $\text{cm}^{-1}$ ; HRMS(EI) for  $\text{C}_{18}\text{H}_{24}\text{FO}_4$   $[\text{M}]^+$ : calcd. 333.1788, found 333.1786.

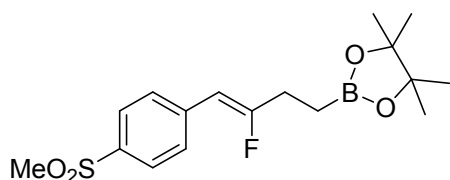

**(Z)-2-(3-Fluoro-4-(4-(methylsulfonyl)phenyl)but-3-en-1-yl)-4,4,5,5-tetramethyl-1,3,2-dioxaborolane (3c).** 66% yield; Colorless liquid;  $^1\text{H NMR}$  (400 MHz,  $\text{CDCl}_3$ )  $\delta$  7.82 (d,  $J = 8.6$  Hz, 2H), 7.58 (d,  $J = 8.6$  Hz, 2H), 5.53 (d,  $J = 38.3$  Hz, 1H), 3.00 (s, 3H), 2.46 (dt,  $J = 15.8, 7.7$  Hz, 2H), 1.21 (s, 12H), 1.06 (t,  $J = 7.7$  Hz, 2H);  $^{13}\text{C NMR}$  (101 MHz,  $\text{CDCl}_3$ )  $\delta$  165.5 (d,  $J = 272.1$  Hz), 139.6 (d,  $J = 2.4$  Hz), 137.8 (d,  $J = 2.6$  Hz), 128.8 (d,  $J = 7.9$  Hz), 127.4 (s), 103.6 (d,  $J = 8.2$  Hz), 83.4 (s), 44.5 (s), 27.5 (d,  $J = 26.7$  Hz), 24.8 (s);  $^{19}\text{F NMR}$  (376 MHz,  $\text{CDCl}_3$ )  $\delta$  -94.79 (dt,  $J = 38.3, 15.8$  Hz, 1F); IR (neat)  $\nu = 2978, 2928, 1687, 1407, 1308, 1150, 965, 767$   $\text{cm}^{-1}$ ; HRMS(EI) calcd. for  $\text{C}_{17}\text{H}_{24}\text{FO}_4\text{S}^{10}\text{B}$   $[\text{M}]^+$  353.1509, found 353.1507.

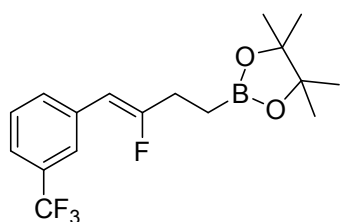

**(Z)-2-(3-Fluoro-4-(3-(trifluoromethyl)phenyl)but-3-en-1-yl)-4,4,5,5-tetramethyl-1,3,2-dioxaborolane (3d).** 52% yield; Colorless liquid;  $^1\text{H NMR}$  (400 MHz,  $\text{CDCl}_3$ )  $\delta$  7.70 (s, 1H), 7.62 (d,  $J = 7.2$  Hz, 1H), 7.49 – 7.31 (m, 2H), 5.52 (d,  $J = 38.5$  Hz, 1H), 2.48 (dt,  $J = 15.8, 7.8$  Hz, 2H), 1.25 (s, 12H), 1.09 (t,  $J = 7.8$  Hz, 2H);  $^{13}\text{C NMR}$  (101 MHz,  $\text{CDCl}_3$ )  $\delta$  164.0 (d,  $J = 268.9$  Hz), 134.6 (d,  $J = 2.3$  Hz), 131.3 (d,  $J = 7.6$  Hz), 130.7 (q,  $J = 32.1$  Hz), 128.7 (s), 124.8 (q,  $J = 3.9$  Hz), 124.1 (q,  $J = 272.3$  Hz), 123.0 (q,  $J = 2.2$  Hz), 103.7 (d,  $J = 8.5$  Hz), 83.4 (s), 27.4 (d,  $J = 27.1$  Hz), 24.8 (s);  $^{19}\text{F NMR}$  (376 MHz,  $\text{CDCl}_3$ )  $\delta$  -62.78 (s, 3F), -98.21 (dt,  $J = 38.5, 15.8$  Hz, 1F); IR (neat)  $\nu = 2980, 1690, 1380, 1329, 1211, 1166, 1128, 846$   $\text{cm}^{-1}$ ; HRMS(EI) for  $\text{C}_{17}\text{H}_{21}\text{F}_4\text{O}_2^{10}\text{B}$   $[\text{M}]^+$ : calcd. 343.1607, found 343.1604.

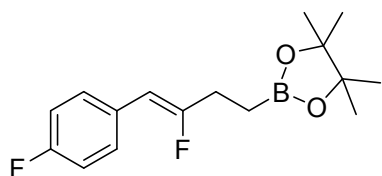

**(Z)-2-(3-Fluoro-4-(4-fluorophenyl)but-3-en-1-yl)-4,4,5,5-tetramethyl-1,3,2-dioxaborolane (3e).** 63% yield; Colorless liquid;  $^1\text{H}$  NMR (400 MHz,  $\text{CDCl}_3$ )  $\delta$  7.41 (dd,  $J = 8.0, 5.7$  Hz, 2H), 6.98 (t,  $J = 8.0$  Hz, 2H), 5.43 (d,  $J = 39.1$  Hz, 1H), 2.44 (dt,  $J = 15.7, 7.8$  Hz, 2H), 1.24 (s, 12H), 1.07 (t,  $J = 7.8$  Hz, 2H);  $^{13}\text{C}$  NMR (101 MHz,  $\text{CDCl}_3$ )  $\delta$  162.3 (dd,  $J = 266.0, 2.3$  Hz), 161.3 (dd,  $J = 246.0, 3.3$  Hz), 130.0 (dd,  $J = 3.4, 2.4$  Hz), 129.7 (t,  $J = 7.7$  Hz), 115.2 (d,  $J = 21.3$  Hz), 103.6 (d,  $J = 9.1$  Hz), 83.3 (s), 27.4 (d,  $J = 27.4$  Hz), 24.8 (s);  $^{19}\text{F}$  NMR (376 MHz,  $\text{CDCl}_3$ )  $\delta$  -101.95 (dt,  $J = 39.1, 15.7$  Hz, 1F), -112.71 – -119.22 (m, 1F); IR (neat)  $\nu = 2979, 2930, 1692, 1606, 1509, 1380, 1327, 848$   $\text{cm}^{-1}$ ; HRMS(EI) for  $\text{C}_{16}\text{H}_{21}\text{F}_2\text{O}_2^{10}\text{B}$   $[\text{M}]^+$ : calcd. 293.1639, found 293.1645.

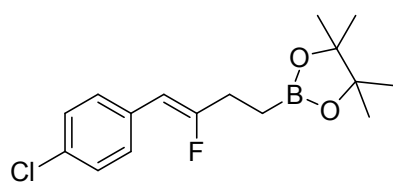

**(Z)-2-(4-(4-Chlorophenyl)-3-fluorobut-3-en-1-yl)-4,4,5,5-tetramethyl-1,3,2-dioxaborolane (3f).** 62% yield; Colorless liquid;  $^1\text{H}$  NMR (400 MHz,  $\text{CDCl}_3$ )  $\delta$  7.37 (d,  $J = 8.6$  Hz, 2H), 7.25 (d,  $J = 8.6$  Hz, 2H), 5.43 (d,  $J = 39.0$  Hz, 1H), 2.44 (dt,  $J = 16.0, 7.6$  Hz, 2H), 1.24 (s, 12H), 1.07 (t,  $J = 7.6$  Hz, 2H);  $^{13}\text{C}$  NMR (101 MHz,  $\text{CDCl}_3$ )  $\delta$  163.1 (d,  $J = 267.5$  Hz), 132.4 (d,  $J = 2.4$  Hz), 131.9 (d,  $J = 3.4$  Hz), 129.4 (d,  $J = 7.7$  Hz), 128.4 (s), 103.7 (d,  $J = 8.8$  Hz), 83.3 (s), 27.4 (d,  $J = 27.2$  Hz), 24.8 (s);  $^{19}\text{F}$  NMR (376 MHz,  $\text{CDCl}_3$ )  $\delta$  -99.65 (dt,  $J = 39.0, 16.0$  Hz, 1F); IR (neat)  $\nu = 2979, 2927, 1690, 1491, 1406, 1372, 1144, 905$   $\text{cm}^{-1}$ ; LRMS(EI) for  $\text{C}_{16}\text{H}_{21}\text{FO}_2\text{C}^{11}\text{B}$   $[\text{M}]^+$ : calcd. 310.1, found 310.1; Anal. for  $\text{C}_{16}\text{H}_{21}\text{FO}_2\text{ClB}$ : calcd. C 61.87, H 6.81, found C 62.00, H 6.93.

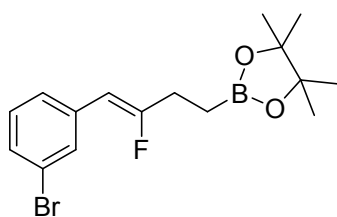

**(Z)-2-(4-(3-Bromophenyl)-3-fluorobut-3-en-1-yl)-4,4,5,5-tetramethyl-1,3,2-dioxaborolane (3g).** 46% yield; Colorless liquid;  $^1\text{H}$  NMR (400 MHz,  $\text{CDCl}_3$ )  $\delta$  7.62 (s, 1H), 7.35 (d,  $J = 7.9$  Hz, 1H), 7.30 (d,  $J = 7.9$  Hz, 1H), 7.15 (t,  $J = 7.9$  Hz, 1H), 5.41 (d,  $J = 39.0$  Hz, 1H), 2.45 (dt,  $J = 15.7, 7.9$  Hz, 2H), 1.24 (s, 12H), 1.07 (t,  $J = 7.9$  Hz, 2H);  $^{13}\text{C}$  NMR (101 MHz,  $\text{CDCl}_3$ )  $\delta$  163.7 (d,  $J = 268.7$  Hz), 136.0 (d,  $J = 2.4$  Hz), 131.0 (d,  $J = 8.2$  Hz), 129.8 (s), 129.4 (s), 126.73 (d,  $J = 7.3$  Hz), 122.4 (s), 103.6 (d,  $J = 8.6$  Hz), 83.3 (s), 27.4 (d,  $J = 27.1$  Hz), 24.8 (s);  $^{19}\text{F}$  NMR (376 MHz,  $\text{CDCl}_3$ )  $\delta$  -101.81 (dt,  $J = 39.0, 15.7$  Hz, 1F); IR (neat)  $\nu = 2979, 2928, 1688, 1593, 1472, 1328, 1074, 847$   $\text{cm}^{-1}$ ; HRMS(EI) for  $\text{C}_{16}\text{H}_{21}\text{FO}_2\text{Br}^{10}\text{B}$   $[\text{M}]^+$ : calcd. 353.0838, found 353.0833.



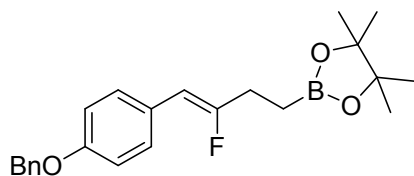

**(Z)-2-(4-(4-(Benzyloxy)phenyl)-3-fluorobut-3-en-1-yl)-4,4,5,5-tetramethyl-1,3,2-dioxaborolane (3h).** 64% yield; Colorless liquid;  $^1\text{H NMR}$  (400 MHz,  $\text{CDCl}_3$ )  $\delta$  7.56 – 7.21 (m, 7H), 6.91 (d,  $J = 8.7$  Hz, 2H), 5.41 (d,  $J = 39.8$  Hz, 1H), 5.05 (s, 2H), 2.43 (dt,  $J = 15.7, 7.9$  Hz, 2H), 1.24 (s, 12H), 1.07 (t,  $J = 7.8$  Hz, 2H);  $^{13}\text{C NMR}$  (101 MHz,  $\text{CDCl}_3$ )  $\delta$  161.5 (d,  $J = 264.2$  Hz), 157.4 (d,  $J = 2.8$  Hz), 137.1 (s), 129.6 (d,  $J = 7.4$  Hz), 128.7 (s), 128.0 (s), 127.6 (s), 127.1 (d,  $J = 2.2$  Hz), 114.8 (s), 104.2 (d,  $J = 9.2$  Hz), 83.4 (s), 70.1 (s), 27.5 (d,  $J = 27.5$  Hz), 24.9 (s);  $^{19}\text{F NMR}$  (376 MHz,  $\text{CDCl}_3$ )  $\delta$  -103.40 (dt,  $J = 39.8, 15.7$  Hz, 1F); IR (neat)  $\nu = 2978, 2927, 1691, 1608, 1437, 1380, 1323, 848$   $\text{cm}^{-1}$ ; LRMS(EI)  $\text{C}_{23}\text{H}_{28}\text{FO}_3^{11}\text{B}$   $[\text{M}]^+$ : calcd. for 382, found 382; Anal. for  $\text{C}_{23}\text{H}_{28}\text{FO}_3\text{B}$ : calcd. C 72.26, H 7.38, found C 72.75, H 7.60.

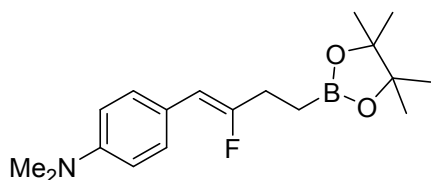

**(Z)-4-(2-Fluoro-4-(4,4,5,5-tetramethyl-1,3,2-dioxaborolan-2-yl)but-1-en-1-yl)-N,N-dimethylaniline (3i).** 72% yield; Yellow liquid;  $^1\text{H NMR}$  (400 MHz,  $\text{CDCl}_3$ )  $\delta$  7.35 (d,  $J = 8.8$  Hz, 2H), 6.69 (d,  $J = 8.8$  Hz, 2H), 5.37 (d,  $J = 40.5$  Hz, 1H), 2.94 (s, 6H), 2.42 (dt,  $J = 15.6, 7.8$  Hz, 2H), 1.24 (s, 12H), 1.06 (t,  $J = 7.8$  Hz, 2H);  $^{13}\text{C NMR}$  (101 MHz,  $\text{CDCl}_3$ )  $\delta$  160.4 (d,  $J = 262.2$  Hz), 148.9 (s), 129.1 (d,  $J = 7.2$  Hz), 123.0 (s), 112.6 (s), 104.3 (d,  $J = 9.5$  Hz), 83.2 (s), 40.7 (s), 27.4 (d,  $J = 27.8$  Hz), 24.8 (s);  $^{19}\text{F NMR}$  (282 MHz,  $\text{CDCl}_3$ )  $\delta$  -105.19 (dt,  $J = 40.5, 15.6$  Hz, 1F); IR (neat)  $\nu = 2978, 2926, 2853, 1690, 1612, 1272, 1144, 847$   $\text{cm}^{-1}$ ; HRMS(EI) for  $\text{C}_{18}\text{H}_{27}\text{NFO}_2^{10}\text{B}$   $[\text{M}]^+$ : calcd. 318.2155, found 318.2158.

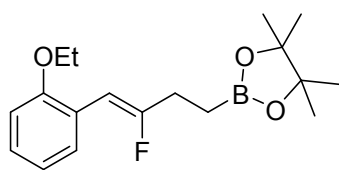

**(Z)-2-(4-(2-Ethoxyphenyl)-3-fluorobut-3-en-1-yl)-4,4,5,5-tetramethyl-1,3,2-dioxaborolane (3k).** 50% yield; Colorless liquid;  $^1\text{H NMR}$  (400 MHz,  $\text{CDCl}_3$ )  $\delta$  7.76 (d,  $J = 7.7$  Hz, 1H), 7.14 (t,  $J = 7.7$  Hz, 1H), 6.91 (t,  $J = 7.5$  Hz, 1H), 6.82 (d,  $J = 7.7$  Hz, 1H), 5.91 (d,  $J = 40.8$  Hz, 1H), 4.01 (q,  $J = 6.8$  Hz, 2H), 2.47 (dt,  $J = 16.1, 7.8$  Hz, 2H), 1.42 (t,  $J = 6.9$  Hz, 3H), 1.25 (s, 12H), 1.10 (t,  $J = 7.8$  Hz, 2H);  $^{13}\text{C NMR}$  (101 MHz,  $\text{CDCl}_3$ )  $\delta$  162.4 (d,  $J = 266.0$  Hz), 155.2 (s), 129.6 (d,  $J = 12.9$  Hz), 127.5 (d,  $J = 1.6$  Hz), 122.9 (d,  $J = 2.9$  Hz), 120.4 (s), 111.5 (s), 98.1 (d,  $J = 7.0$  Hz), 83.2 (s), 63.8 (s), 27.8 (d,  $J = 28.0$  Hz), 24.8 (s), 14.9 (s);  $^{19}\text{F NMR}$  (376 MHz,  $\text{CDCl}_3$ )  $\delta$  -102.71 (dt,  $J = 40.8, 16.1$  Hz, 1F); IR (neat)  $\nu = 2979, 2931, 1687, 1489, 1454, 1379, 1324, 1144$   $\text{cm}^{-1}$ ; HRMS(EI) for  $\text{C}_{18}\text{H}_{26}\text{FO}_3^{10}\text{B}$   $[\text{M}]^+$ : calcd. 319.1995, found 319.1994.

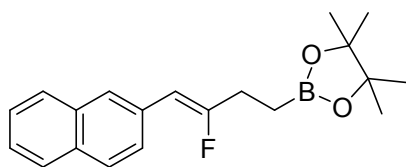

**(Z)-2-(3-Fluoro-4-(naphthalen-2-yl)but-3-en-1-yl)-4,4,5,5-tetramethyl-1,3,2-dioxaborolane (3l).** 67% yield; Colorless liquid;  $^1\text{H NMR}$  (400 MHz,  $\text{CDCl}_3$ )  $\delta$  7.87 (s, 1H), 7.83-7.74 (m, 3H), 7.63 (d,  $J = 8.5$  Hz, 1H), 7.48-7.38 (m, 2H), 5.63 (d,  $J = 39.5$  Hz, 1H), 2.51 (dt,  $J = 15.4, 7.7$  Hz, 2H), 1.24 (s, 12H), 1.12 (t,  $J = 7.7$  Hz, 2H);  $^{13}\text{C NMR}$  (101 MHz,  $\text{CDCl}_3$ )  $\delta$  162.9 (d,  $J = 267.2$  Hz), 133.5 (s), 132.1 (d,  $J = 1.6$  Hz), 131.5 (d,  $J = 2.5$  Hz), 127.9 (s), 127.8 (s), 127.5 (s), 126.9 (d,  $J = 7.4$  Hz), 126.6 (d,  $J = 7.6$  Hz), 125.9 (s), 125.5 (s), 104.8 (d,  $J = 8.6$  Hz), 83.3 (s), 27.6 (d,  $J = 27.4$  Hz), 24.8 (s);  $^{19}\text{F NMR}$  (376 MHz,  $\text{CDCl}_3$ )  $\delta$  -100.00 (dt,  $J = 39.5, 15.4$  Hz, 1F); IR (neat)  $\nu = 2978, 2928, 1687, 1379, 1326, 1214, 1144, 745$   $\text{cm}^{-1}$ ; LRMS(EI) for  $\text{C}_{20}\text{H}_{24}\text{FO}_2^{11}\text{B}$   $[\text{M}]^+$ : calcd. 382, found 382; Anal. for  $\text{C}_{20}\text{H}_{24}\text{FO}_2\text{B}$ : calcd. C 73.64, H 7.42, found C 73.43, H 7.51.

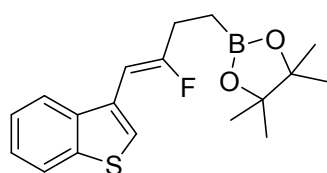

**(Z)-2-(4-(Benzo[*b*]thiophen-3-yl)-3-fluorobut-3-en-1-yl)-4,4,5,5-tetramethyl-1,3,2-dioxaborolane (3m).** 53% yield; Colorless liquid;  $^1\text{H NMR}$  (400 MHz,  $\text{CDCl}_3$ )  $\delta$  7.87 – 7.83 (m, 1H), 7.77 (d,  $J = 7.5$  Hz, 1H), 7.71 (s, 1H), 7.49 – 7.28 (m, 2H), 5.87 (d,  $J = 38.8$  Hz, 1H), 2.56 (dt,  $J = 15.3, 7.7$  Hz, 2H), 1.24 (s, 14H), 1.15 (t,  $J = 7.7$  Hz, 2H);  $^{13}\text{C NMR}$  (101 MHz,  $\text{CDCl}_3$ )  $\delta$  163.8 (d,  $J = 266.8$  Hz), 139.3 (s), 138.1 (s), 127.7 (s), 124.2 (s), 123.9 (t,  $J = 6.8$  Hz), 122.6 (s), 121.2 (s), 96.6 (d,  $J = 11.4$  Hz), 83.3 (s), 27.3 (d,  $J = 26.9$  Hz), 24.8 (s);  $^{19}\text{F NMR}$  (376 MHz,  $\text{CDCl}_3$ )  $\delta$  -96.48 (dt,  $J = 38.8, 15.3$  Hz, 1F); IR (neat)  $\nu = 2978, 2928, 1688, 1379, 1325, 1143, 967, 758$   $\text{cm}^{-1}$ ; HRMS(EI) or  $\text{C}_{18}\text{H}_{22}\text{F}_2\text{O}_2\text{S}^{10}\text{B}$   $[\text{M}]^+$ : calcd. 331.1454, found 331.1449.

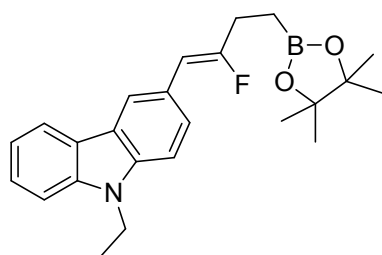

**(Z)-9-Ethyl-3-(2-fluoro-4-(4,4,5,5-tetramethyl-1,3,2-dioxaborolan-2-yl)but-1-en-1-yl)-9H-carbazole (3o).** 69% yield; Colorless liquid;  $^1\text{H NMR}$  (400 MHz,  $\text{CDCl}_3$ )  $\delta$  8.21 (s, 1H), 8.07 (d,  $J = 7.6$  Hz, 1H), 7.57 (d,  $J = 7.4$  Hz, 1H), 7.42 (t,  $J = 7.6$  Hz, 1H), 7.33 (d,  $J = 8.1$  Hz, 1H), 7.28 (d,  $J = 8.5$  Hz, 1H), 7.20 (t,  $J = 7.2$  Hz, 1H), 5.64 (d,  $J = 40.0$  Hz, 1H), 4.26 (q,  $J = 7.1$  Hz, 2H), 2.51 (dt,  $J = 15.6, 7.8$  Hz, 2H), 1.36 (t,  $J = 7.1$  Hz, 3H), 1.24 (s, 12H), 1.14 (t,  $J = 7.8$  Hz, 2H);  $^{13}\text{C NMR}$  (101 MHz,  $\text{CDCl}_3$ )  $\delta$  160.7 (d,  $J = 262.9$  Hz), 140.1 (s), 138.6 (d,  $J = 2.1$  Hz), 126.3 (d,  $J = 6.9$  Hz), 125.5 (s), 124.9 (d,  $J = 2.3$  Hz), 122.9 (s), 120.4 (s), 120.1 (s), 120.0 (s), 118.7 (s), 108.4 (s), 108.1 (s), 105.2 (d,  $J = 9.0$  Hz), 83.2 (s), 37.4 (s), 27.5 (d,  $J = 27.7$  Hz), 24.7 (s), 13.7 (s);  $^{19}\text{F NMR}$  (376 MHz,  $\text{CDCl}_3$ )  $\delta$  -104.23 (dt,  $J = 40.0, 15.6$  Hz, 1F); IR (neat)  $\nu = 2977, 2933, 1689, 1599, 1491, 1379, 1331, 1144$   $\text{cm}^{-1}$ ; HRMS(ESI) for  $\text{C}_{16}\text{H}_{21}\text{F}_2\text{O}_2^{11}\text{B}$   $[\text{M}+\text{H}]^+$ : calcd. 394.2348, found 394.2369.

## 9. Evidence for the Proposed Mechanism

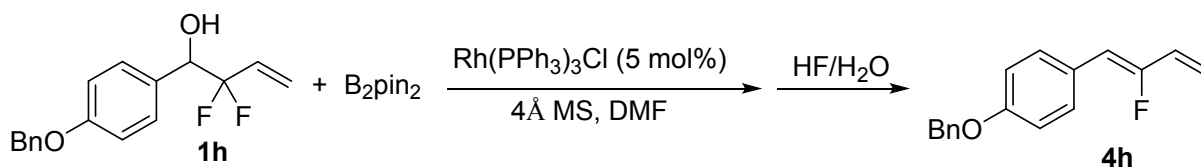

In a glove box, Rh(PPh<sub>3</sub>)<sub>3</sub>Cl (23.1 mg, 0.025 mmol), B<sub>2</sub>pin<sub>2</sub> (191 mg, 0.75 mmol), 4Å MS (100 mg), **1h** (0.5 mmol) and DMF (2 mL) were added into a sealable tube and the tube was sealed. The mixture was stirred at 120 °C for 70 min and then cooled to room temperature. HF (35% in water) (5 drops) was added using a plastic dropper. The mixture was stirred for another 5 min. No isomers of **4h** were detected by <sup>19</sup>F NMR. Water (30 mL) was added and the resulting mixture was extracted with Et<sub>2</sub>O (30 mL ×3). The organic solutions were combined and dried over Na<sub>2</sub>SO<sub>4</sub>. After filtration, the solvent was removed under reduced pressure. The pure product **4h** was obtained by flash column chromatography.

**(Z)-1-(Benzyloxy)-4-(2-fluorobuta-1,3-dien-1-yl)benzene (4h)**. 65% yield; White solid; <sup>1</sup>H NMR (400 MHz, CDCl<sub>3</sub>) δ 7.48 (d, *J* = 8.4 Hz, 2H), 7.45-7.29 (m, 5H), 6.94 (d, *J* = 8.5 Hz, 2H), 6.33 – 6.09 (m, 1H), 5.68 – 5.16 (m, 3H), 5.06 (s, 2H); <sup>13</sup>C NMR (101 MHz, CDCl<sub>3</sub>) δ 158.1 (d, *J* = 3.0 Hz), 155.6 (d, *J* = 258.4 Hz), 136.8 (s), 130.3 (d, *J* = 7.8 Hz), 129.6 (d, *J* = 25.3 Hz), 128.6 (s), 128.0 (s), 127.4 (s), 126.5 (d, *J* = 3.2 Hz), 114.9 (s), 114.2 (d, *J* = 4.7 Hz), 109.8 (d, *J* = 9.8 Hz), 69.9 (s); <sup>19</sup>F NMR (376 MHz, CDCl<sub>3</sub>) δ -122.14 (dd, *J* = 38.4, 26.4 Hz, 1F); IR (neat) ν = 2901, 1597, 1509, 1350, 1173, 1025, 980, 734 cm<sup>-1</sup>; HRMS(EI) for C<sub>17</sub>H<sub>15</sub>OF [M]<sup>+</sup>: calcd. 254.1107, found 254.1106.

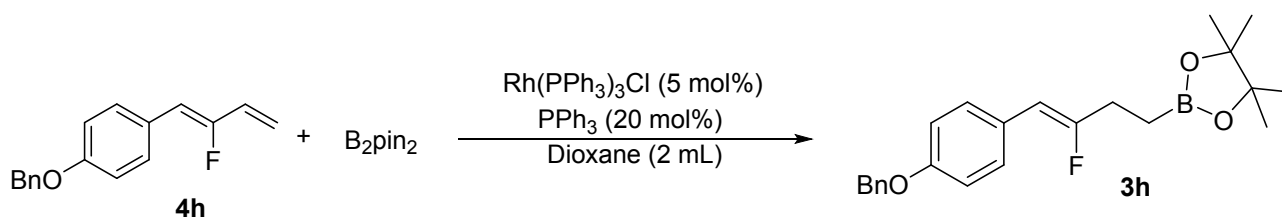

In a glove box, Rh(PPh<sub>3</sub>)<sub>3</sub>Cl (23.1 mg, 0.025 mmol), B<sub>2</sub>pin<sub>2</sub> (254 mg, 1.0 mmol), PPh<sub>3</sub> (26.2 mg, 0.1 mmol), diene **4h** (0.5 mmol) and dioxane (2 mL) were added to a sealable tube and the tube was sealed. The mixture was stirred at 80 °C for 12 h and cooled to room temperature. Water (30 mL) was added and the resulting mixture was extracted with Et<sub>2</sub>O (30 mL ×3). The organic layers were combined and dried over Na<sub>2</sub>SO<sub>4</sub>. After filtration, the solvent was removed under reduced pressure. The product **3h** was detected by <sup>19</sup>F NMR in 25% yield.

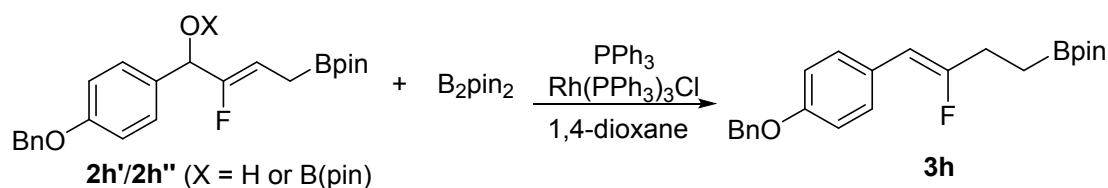

In a glove box, Rh(PPh<sub>3</sub>)<sub>3</sub>Cl (23.1 mg, 0.025 mmol), B<sub>2</sub>pin<sub>2</sub> (254 mg, 1.0 mmol), PPh<sub>3</sub> (26.2 mg, 0.1 mmol), the mixture of **2h'**/**2h''** (0.5 mmol), obtained by the procedure mentioned in Supporting Information Section 6, and dioxane (2 mL) were added to a sealable tube and the tube was sealed. The mixture was stirred at 80 °C for 12 h and cooled to room temperature. Water (30 mL) was added and the resulting mixture was extracted with Et<sub>2</sub>O (30 mL ×3). The organic layers were combined and dried over Na<sub>2</sub>SO<sub>4</sub>. After filtration, the solvent was removed under reduced pressure. The product **3h** detected by <sup>19</sup>F NMR in 19% yield.

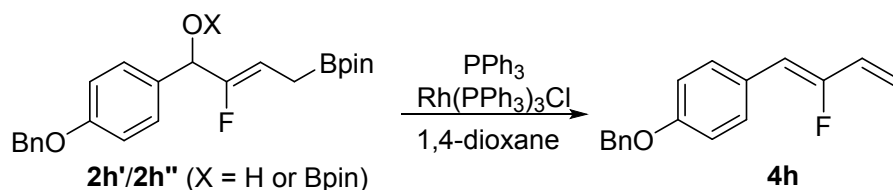

In a glove box, Rh(PPh<sub>3</sub>)<sub>3</sub>Cl (23.1 mg, 0.025 mmol), PPh<sub>3</sub> (131.0 mg, 0.5 mmol), the mixture of **2h'**/**2h''** (0.5 mmol), obtained by the procedure mentioned in Supporting Information Section 6, and dioxane (2 mL) were added to a sealable tube and the tube was sealed. The mixture was stirred at 80 °C for 12 h and cooled to room temperature. Water (30 mL) was added and the resulting mixture was extracted with Et<sub>2</sub>O (30 mL ×3). The organic layers were combined and dried over Na<sub>2</sub>SO<sub>4</sub>. After filtration, the solvent was removed under reduced pressure. The product **4h** was detected by <sup>19</sup>F NMR in 82% yield.

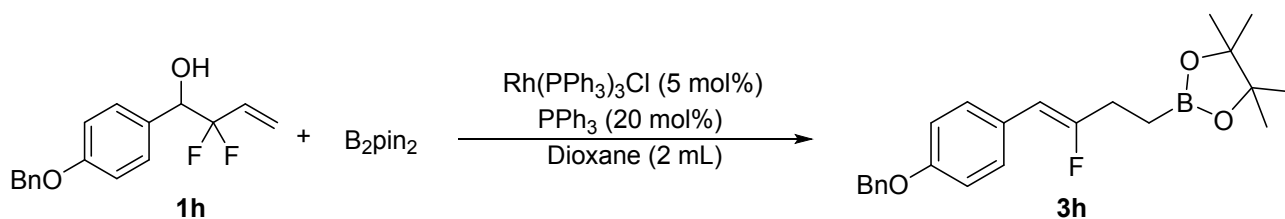

**General Kinetics Experimental Procedure:** In a glove box, substrate **1h** (0.5 mmol, 1.0 equiv), B<sub>2</sub>pin<sub>2</sub> (1.0 mmol, 2.0 equiv), Rh(PPh<sub>3</sub>)<sub>3</sub>Cl (23.1 mg, 5 mol%), PPh<sub>3</sub> (26.2 mg, 0.2 equiv) were added in a 10 mL tube, followed by addition of internal standard 1-fluoronaphthalene (14.6 mg, 0.1 mmol) and dioxane (2.0 mL). The tube was sealed using an open top cap with PTFE cap liner, and moved outside the glovebox, the tube was then heated to 80 °C. The reaction progress was monitored by removing aliquots (~50 μL) from the reaction mixture via syringe under N<sub>2</sub>. Each aliquot was dissolved in C<sub>6</sub>D<sub>6</sub> and analyzed by <sup>19</sup>F NMR.

#### Kinetic Plots for “Different Excess” Experiment

“Different excess” studies were performed using general kinetics experimental procedure and the data was analyzed using the method reported by Donna G. Blackmond *et al* (**Ref. *Angew. Chem. Int. Ed.* 2005, 44, 4302–4320; *J. Org. Chem.* 2006, 71, 4711–4722**).

“Different excess” experiments reveal that this reaction is zero order to substrate and B<sub>2</sub>pin<sub>2</sub>.

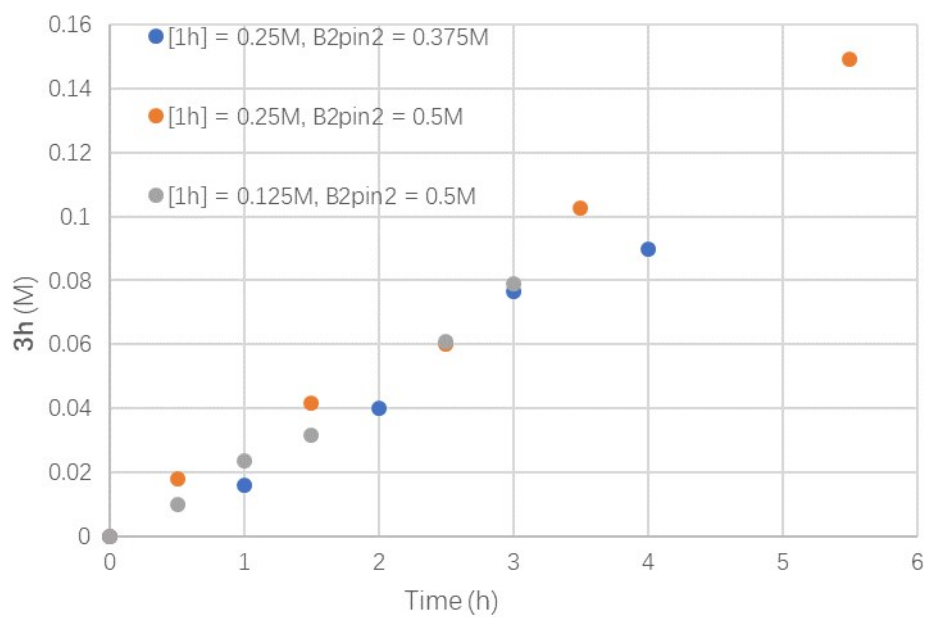

**Figure S1** Time-course for the dehydroxylative/defluorinative borylation reaction.

## 10. $^1\text{H}$ NMR, $^{19}\text{F}$ NMR and $^{13}\text{C}$ NMR Spectra

$^1\text{H}$  NMR spectrum of compound **1o**

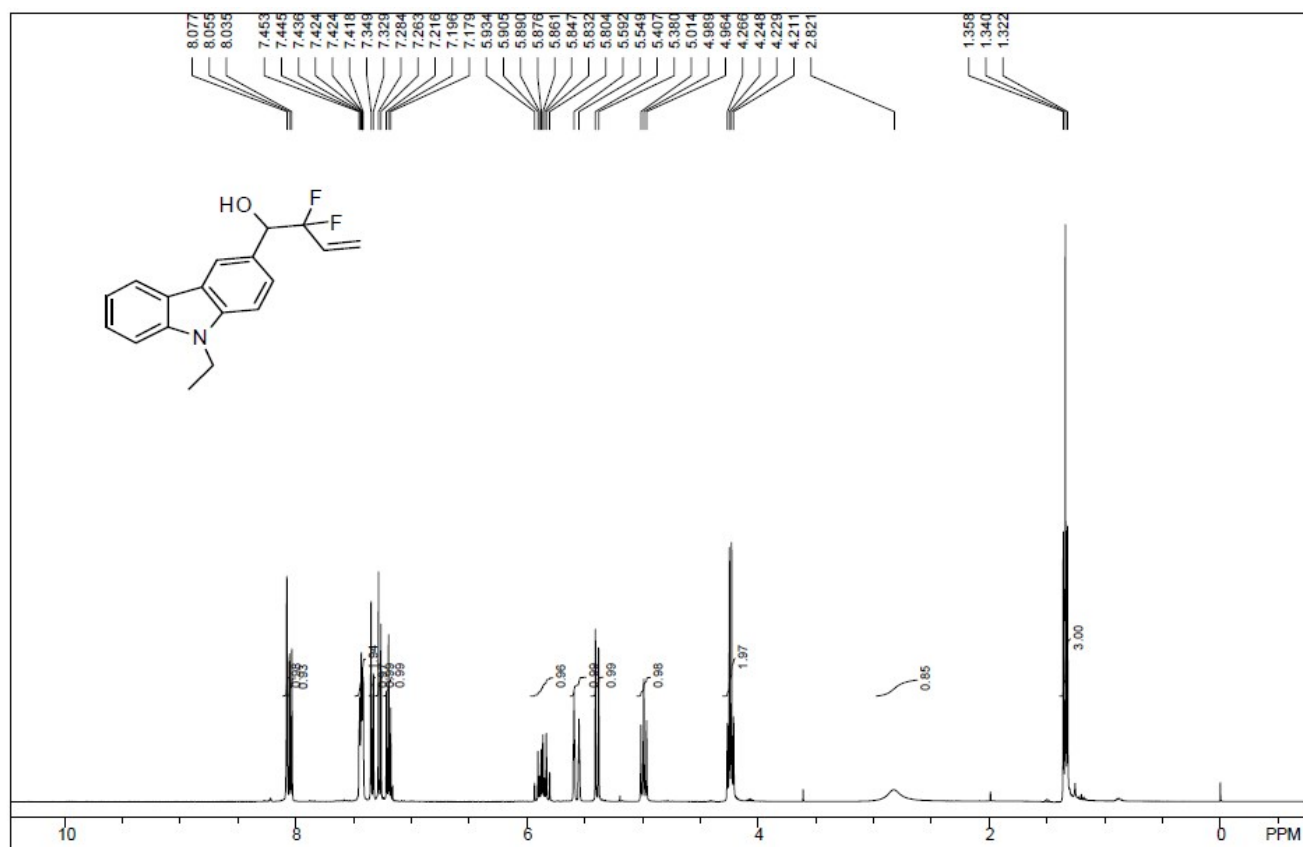

$^{13}\text{C}$  NMR spectrum of compound **1o**

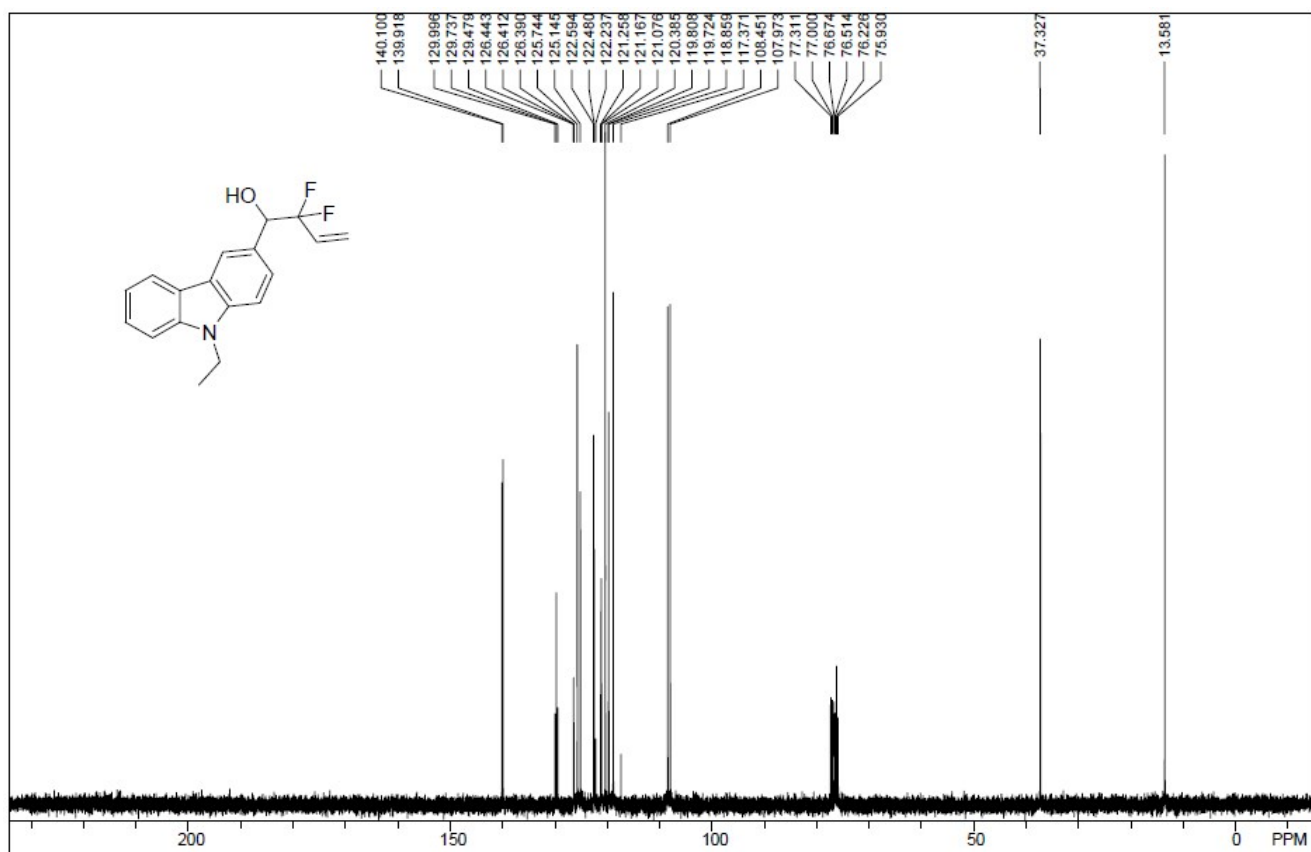

$^{19}\text{F}$  NMR spectrum of compound **1o**

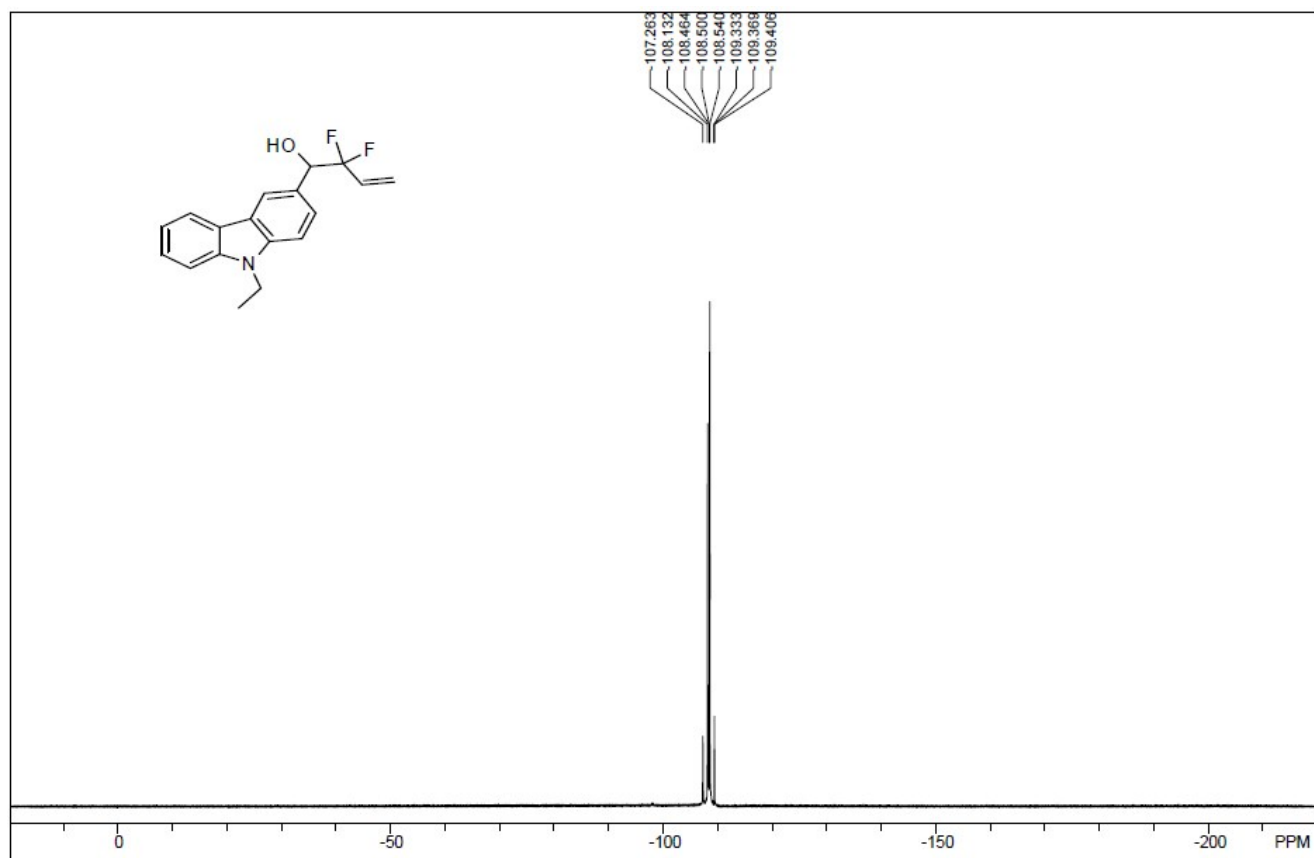

$^1\text{H}$  NMR spectrum of compound **2a'**

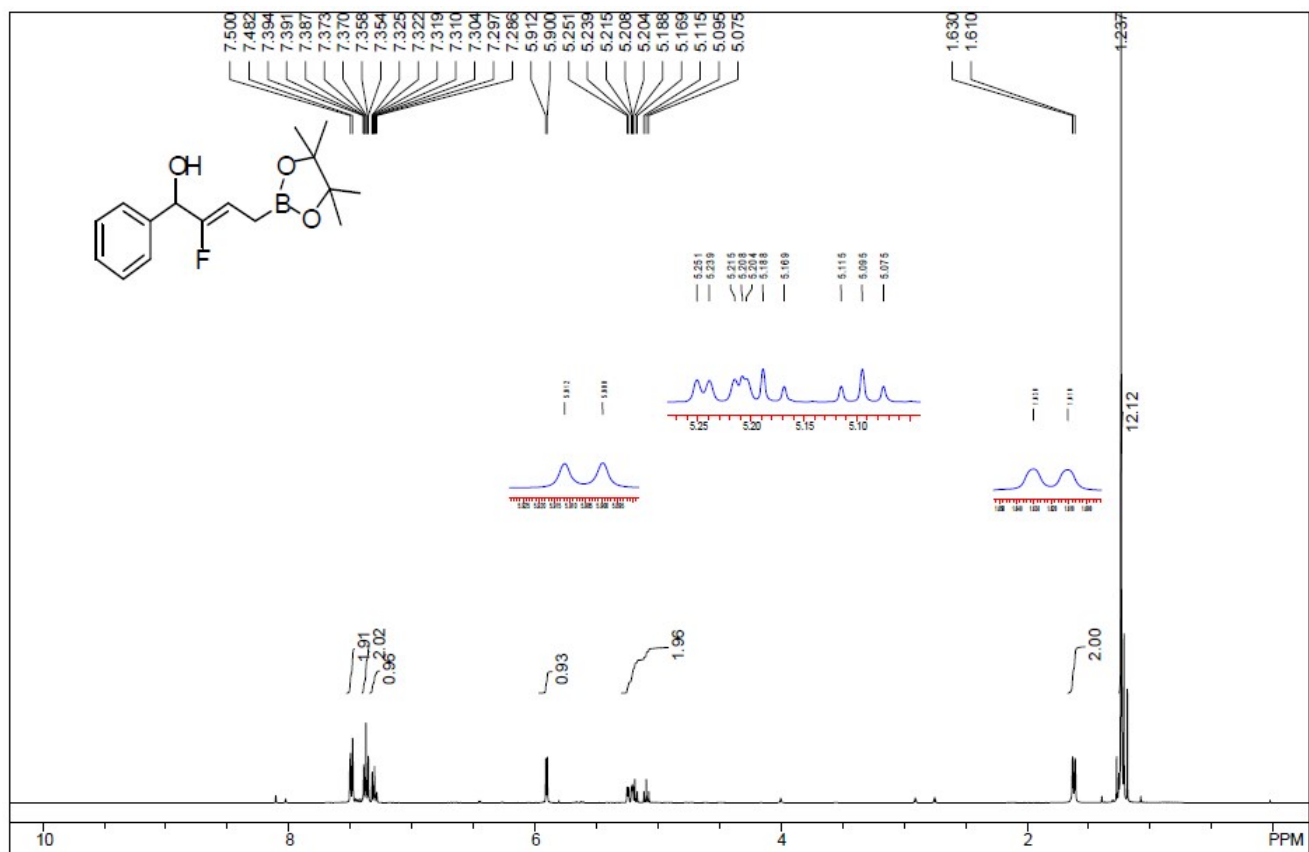

<sup>13</sup>C NMR spectrum of compound **2a'**

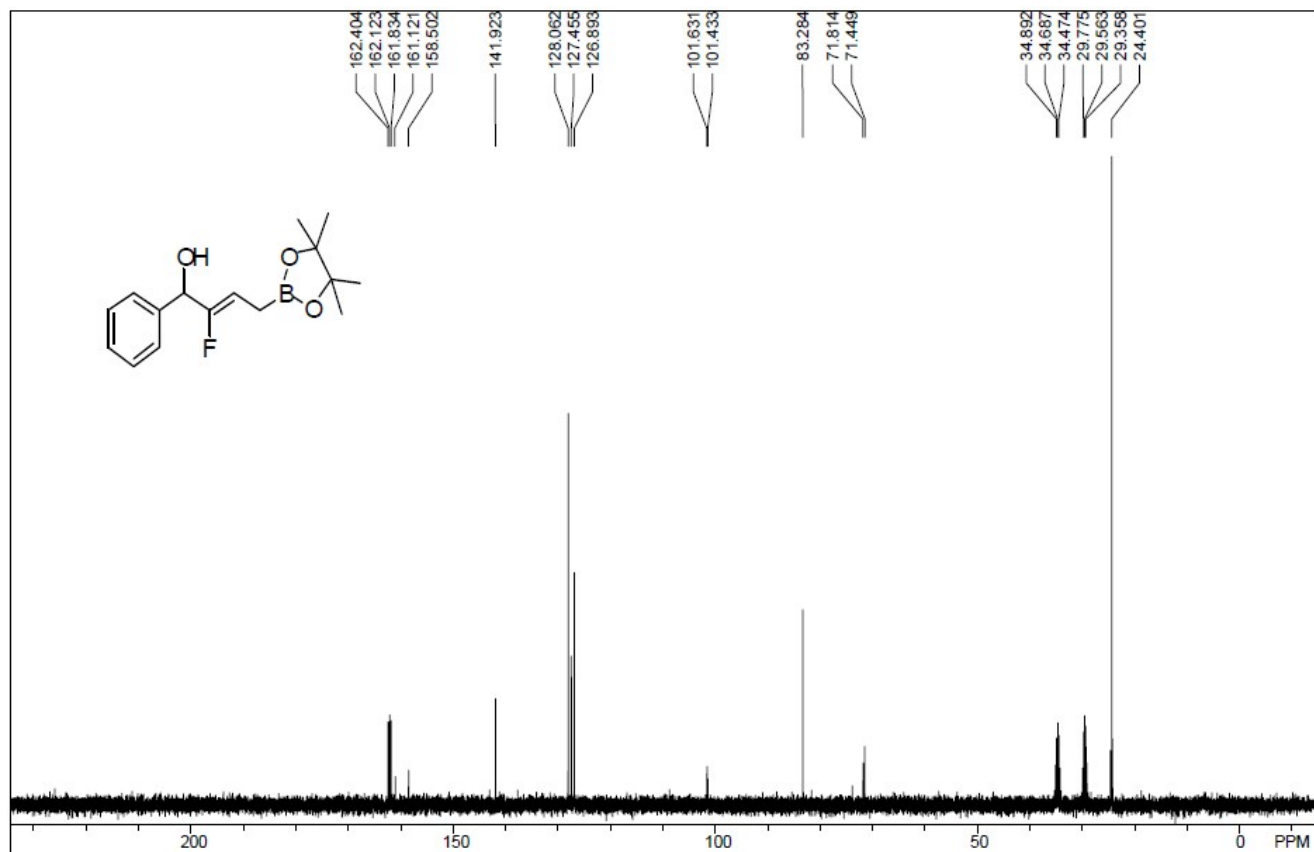

<sup>19</sup>F NMR spectrum of compound **2a'**

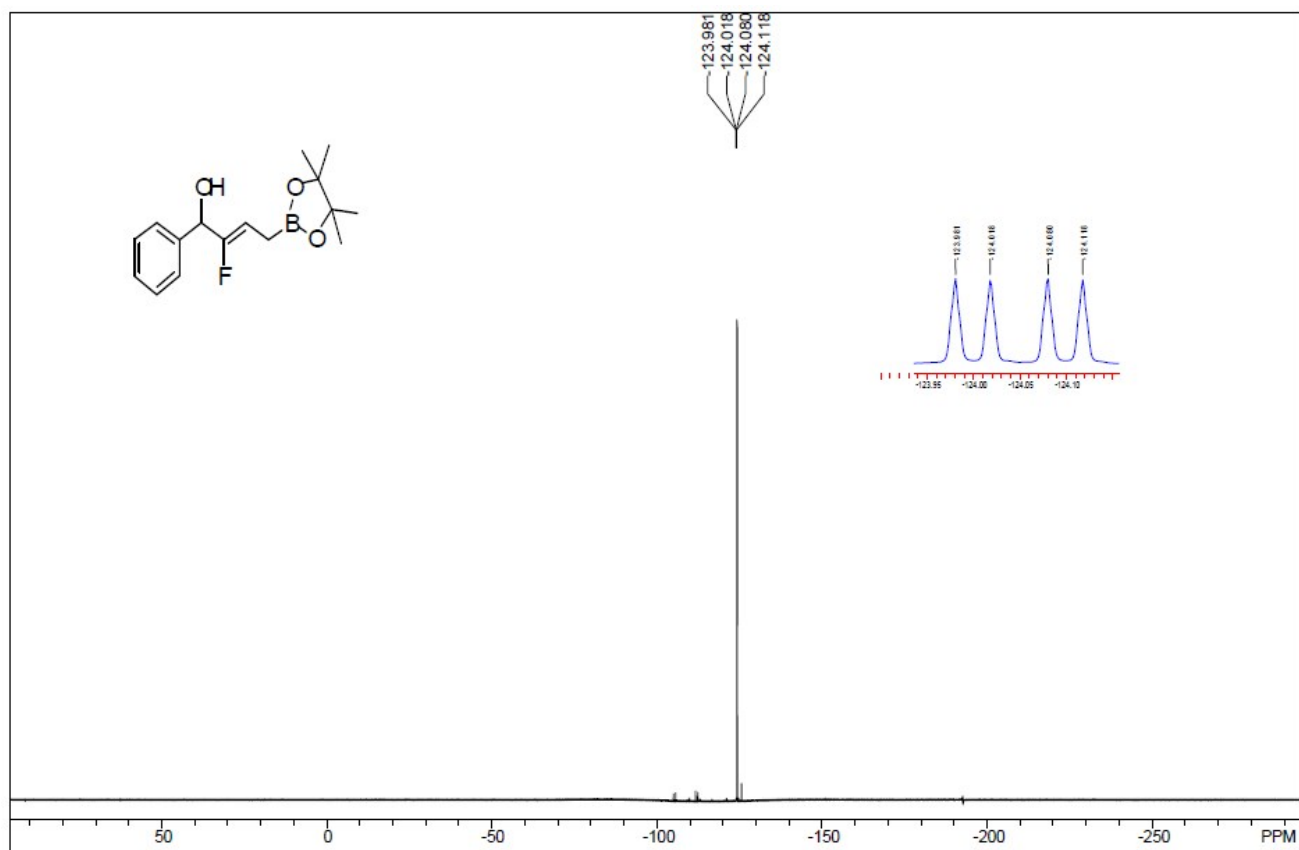



<sup>1</sup>H NMR spectrum of compound **2a**

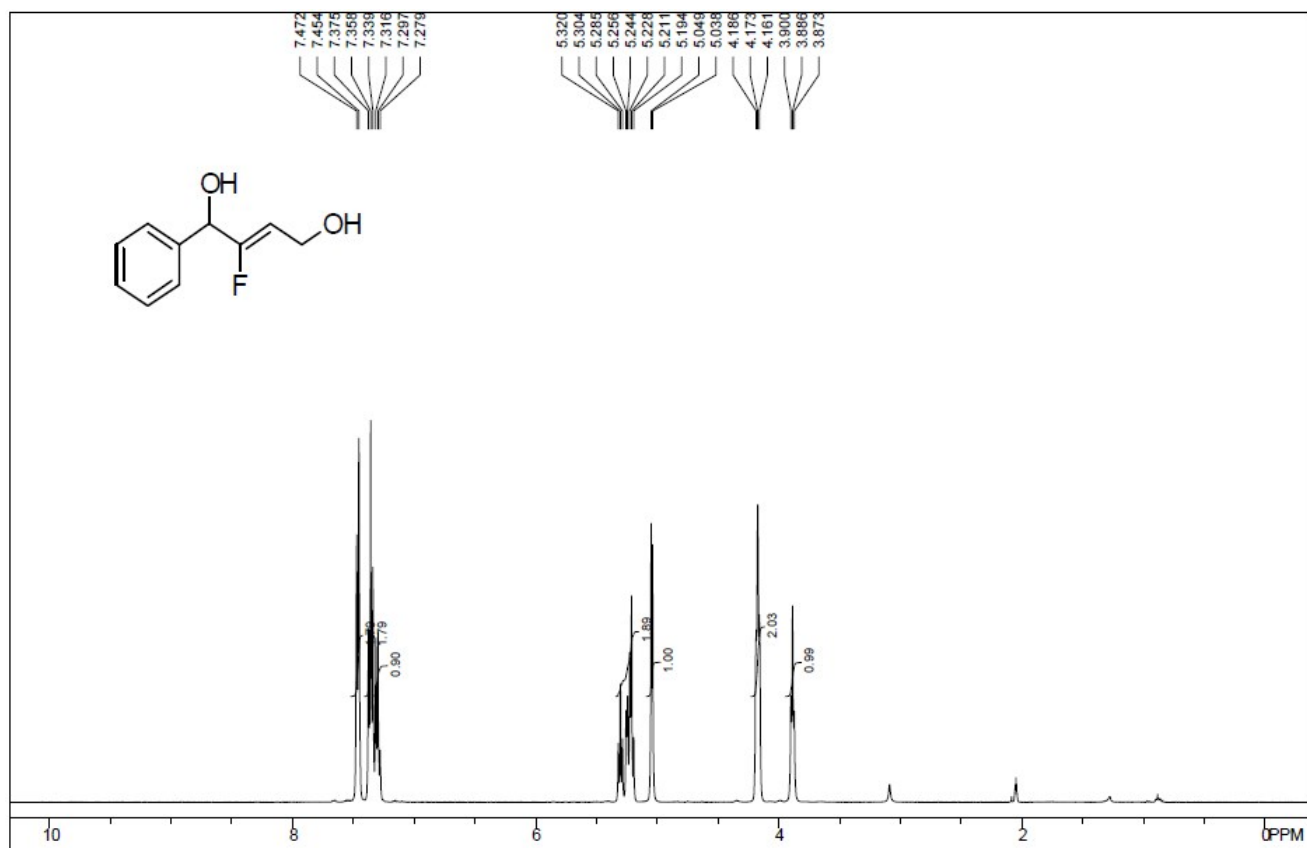

<sup>13</sup>C NMR spectrum of compound **2a**

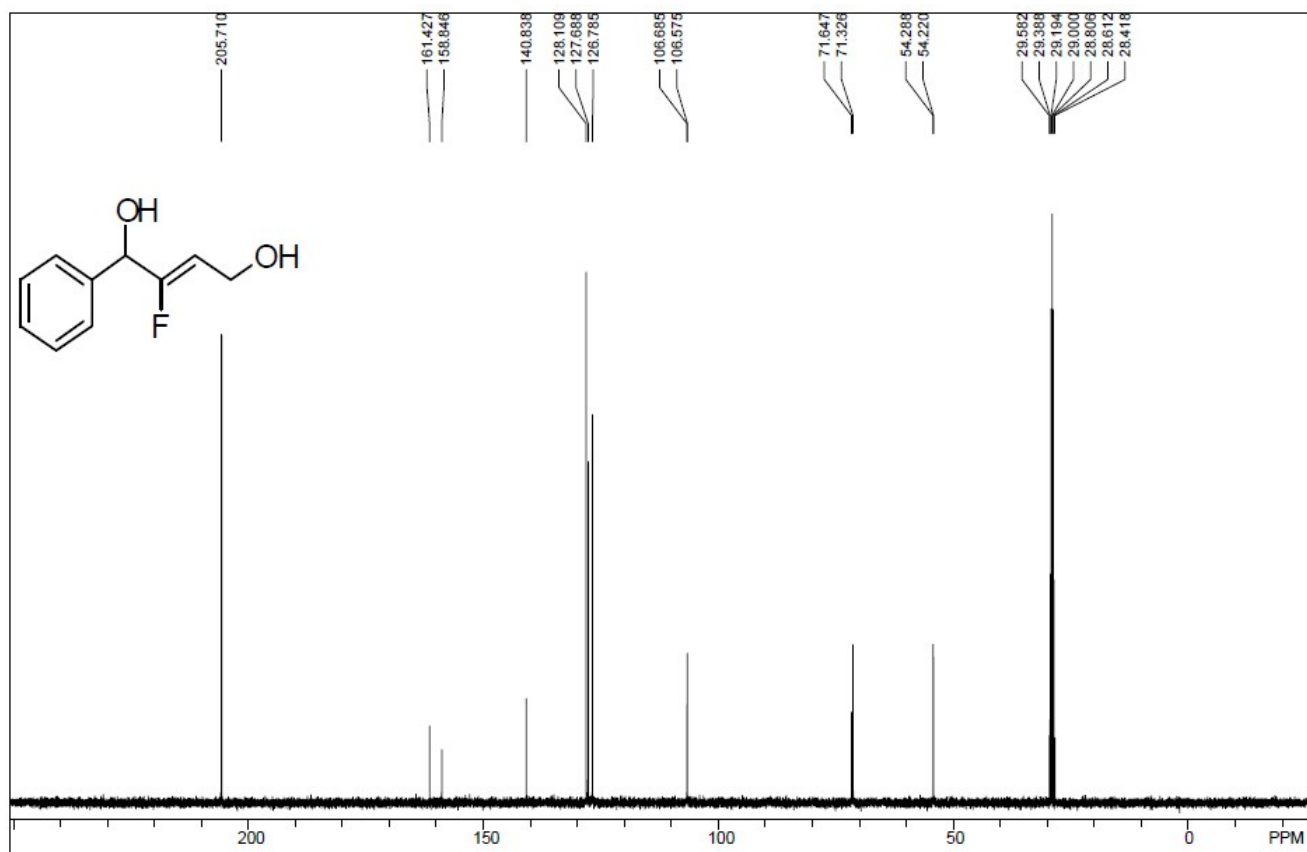

$^{19}\text{F}$  NMR spectrum of compound **2a**

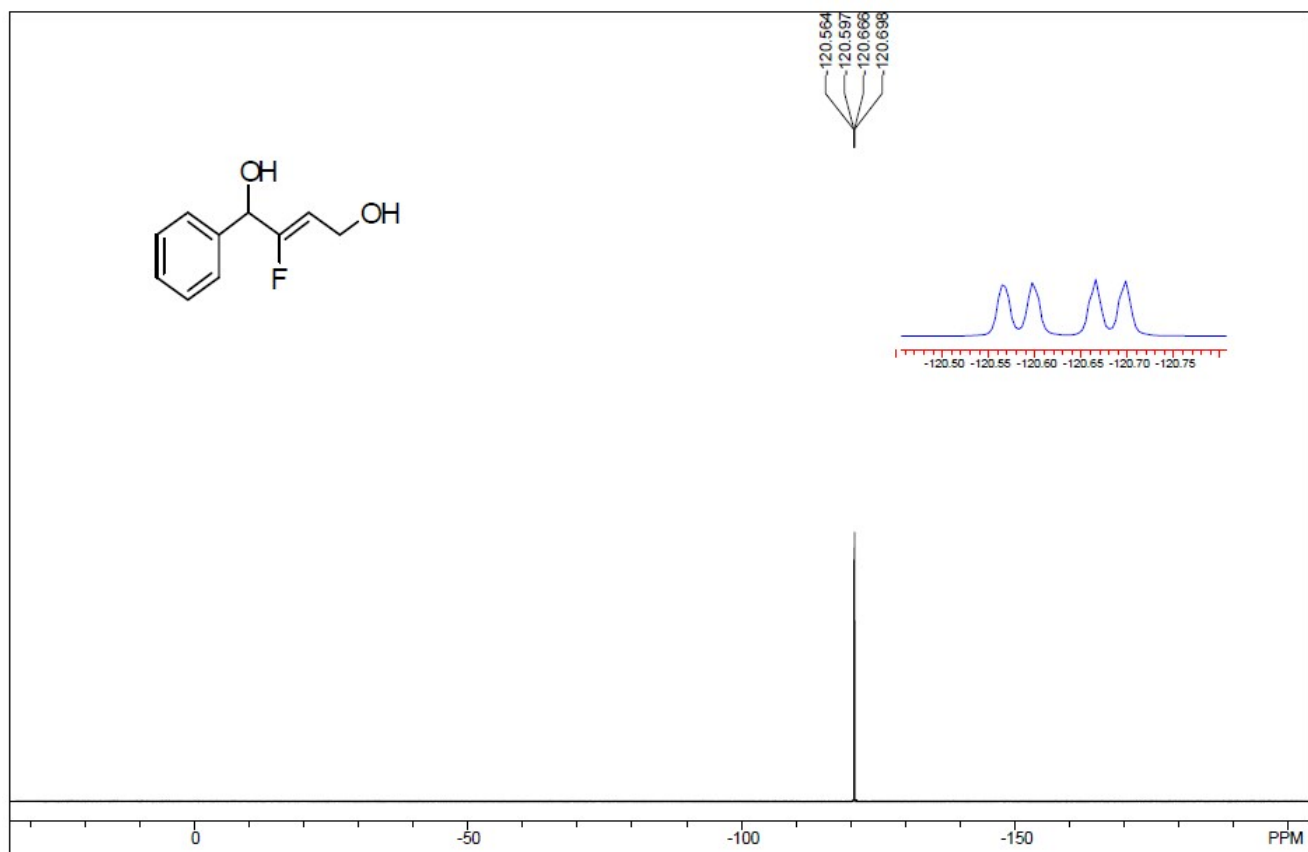

$^1\text{H}$  NMR spectrum of compound **2b**

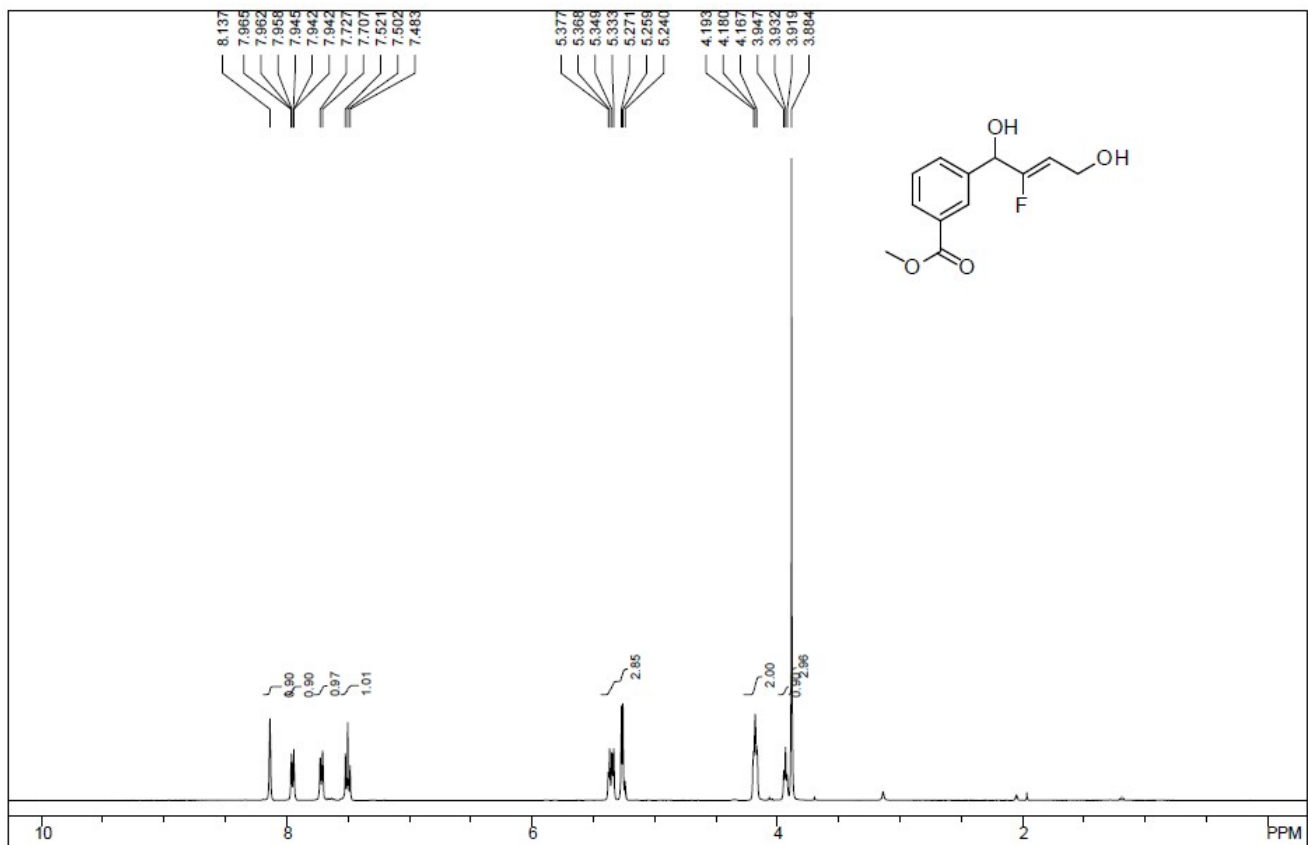

<sup>13</sup>C NMR spectrum of compound **2b**

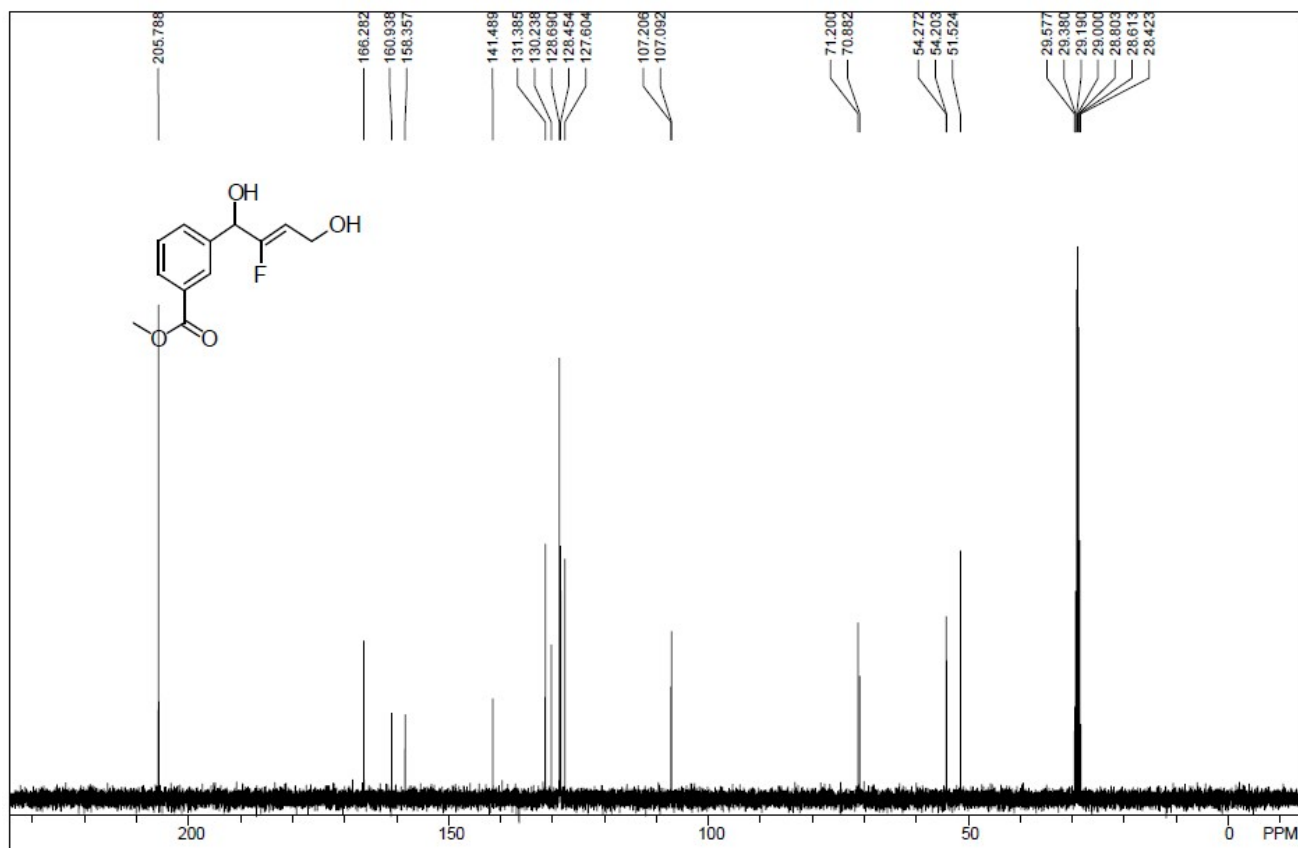

<sup>19</sup>F NMR spectrum of compound **2b**

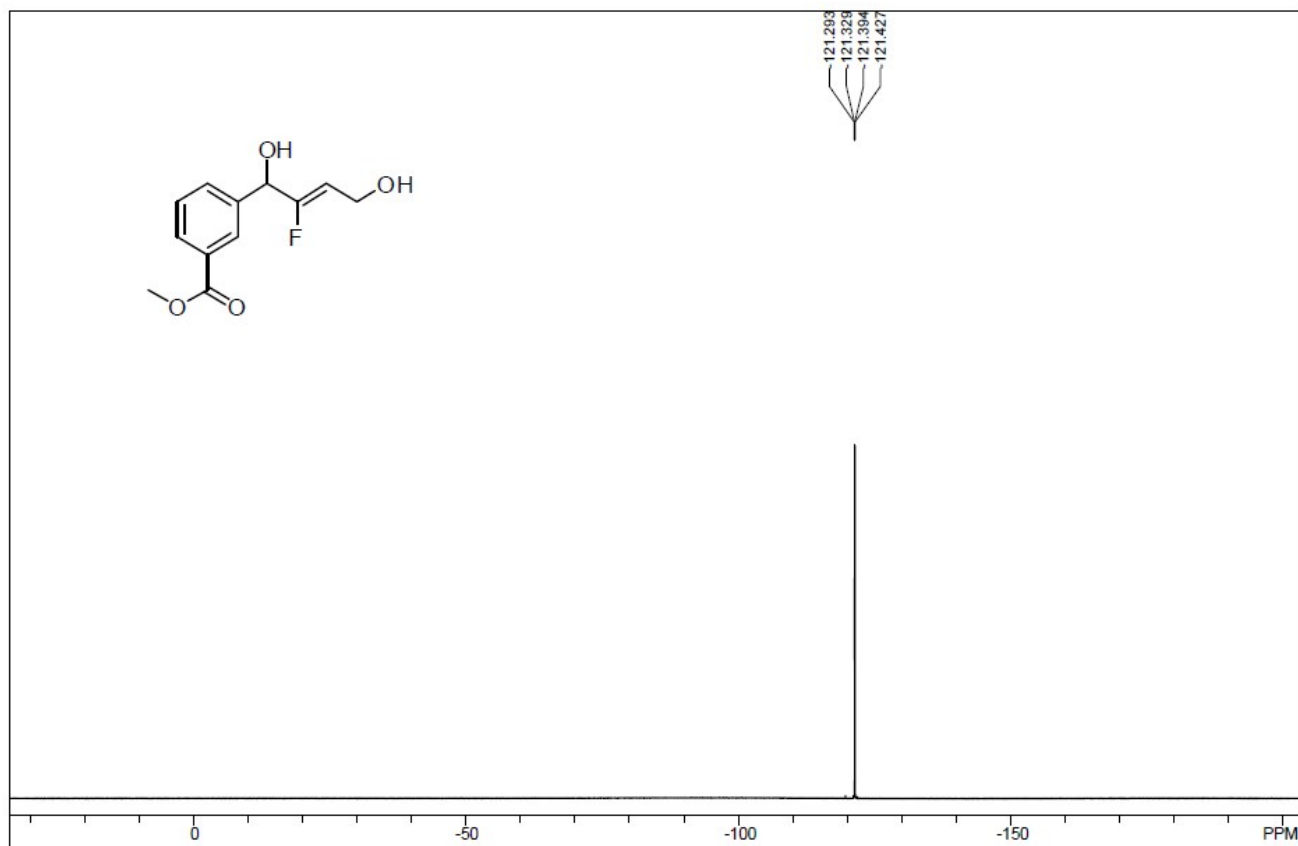

<sup>1</sup>H NMR spectrum of compound **2c**

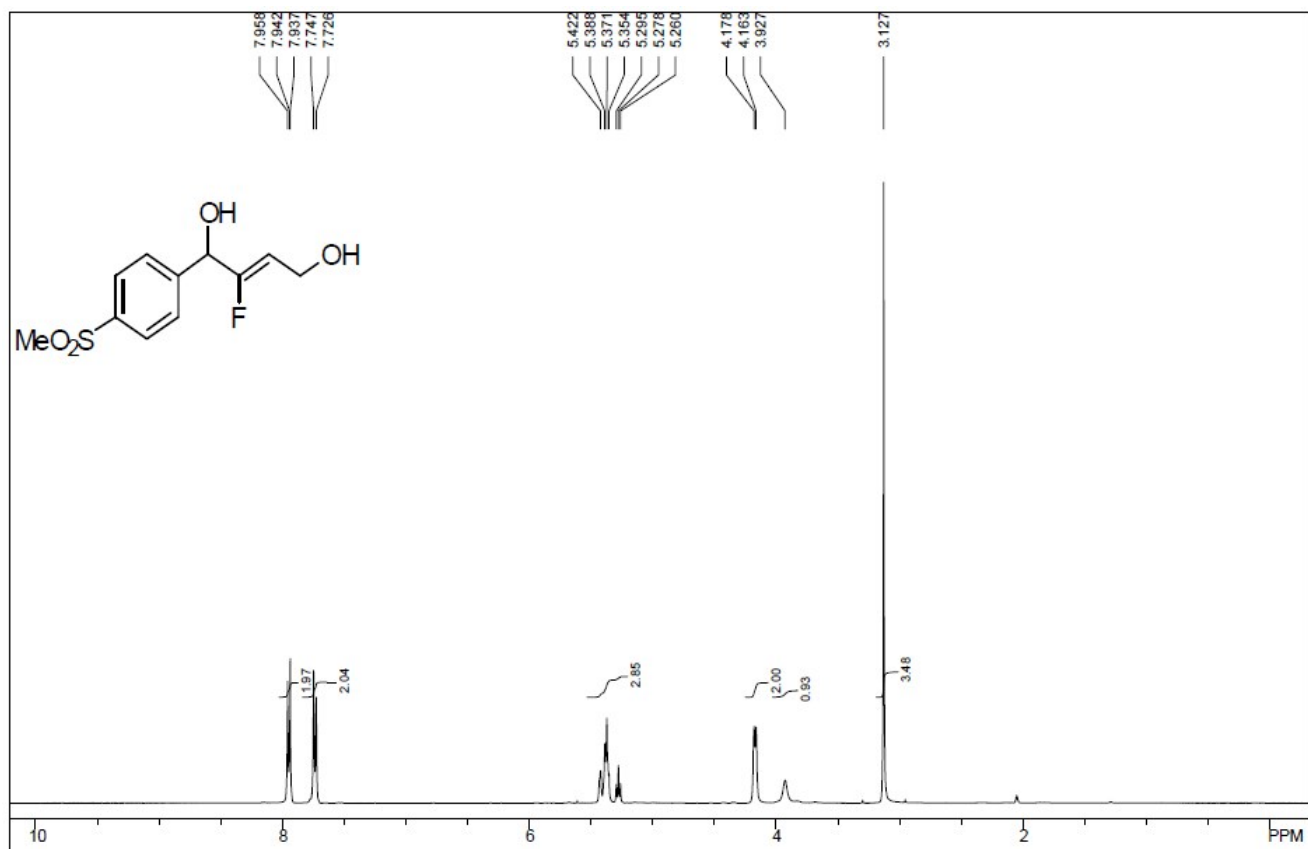

<sup>13</sup>C NMR spectrum of compound **2c**

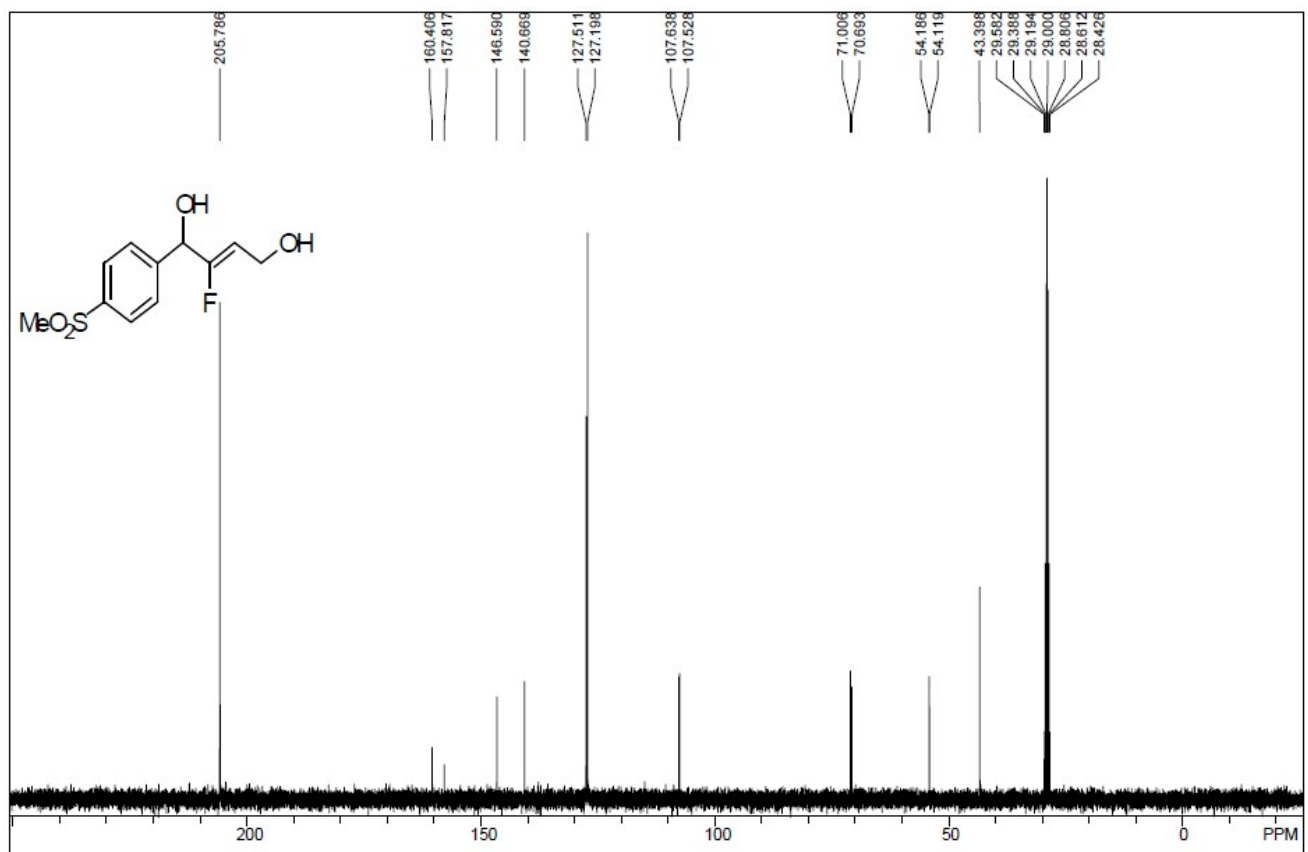

$^{19}\text{F}$  NMR spectrum of compound **2c**

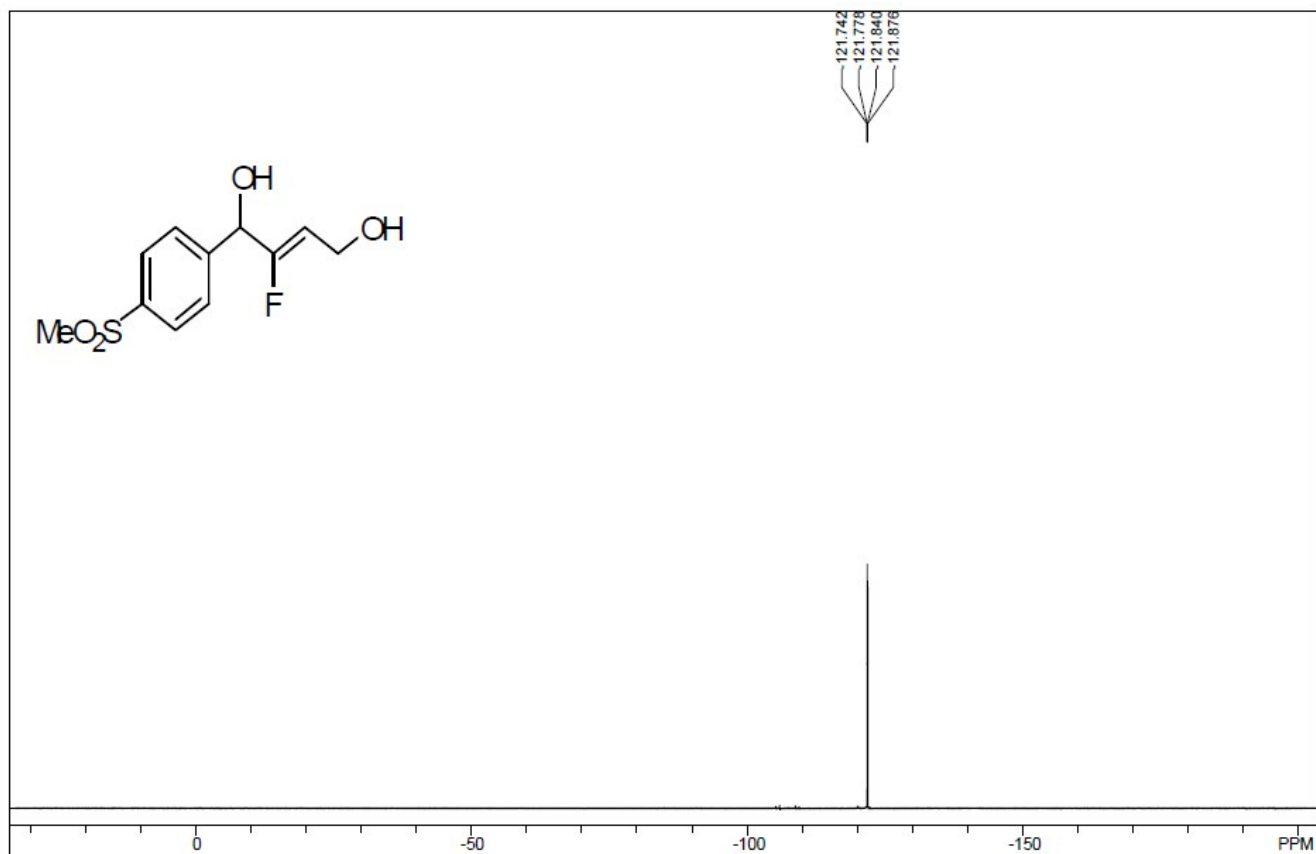

$^1\text{H}$  NMR spectrum of compound **2d**

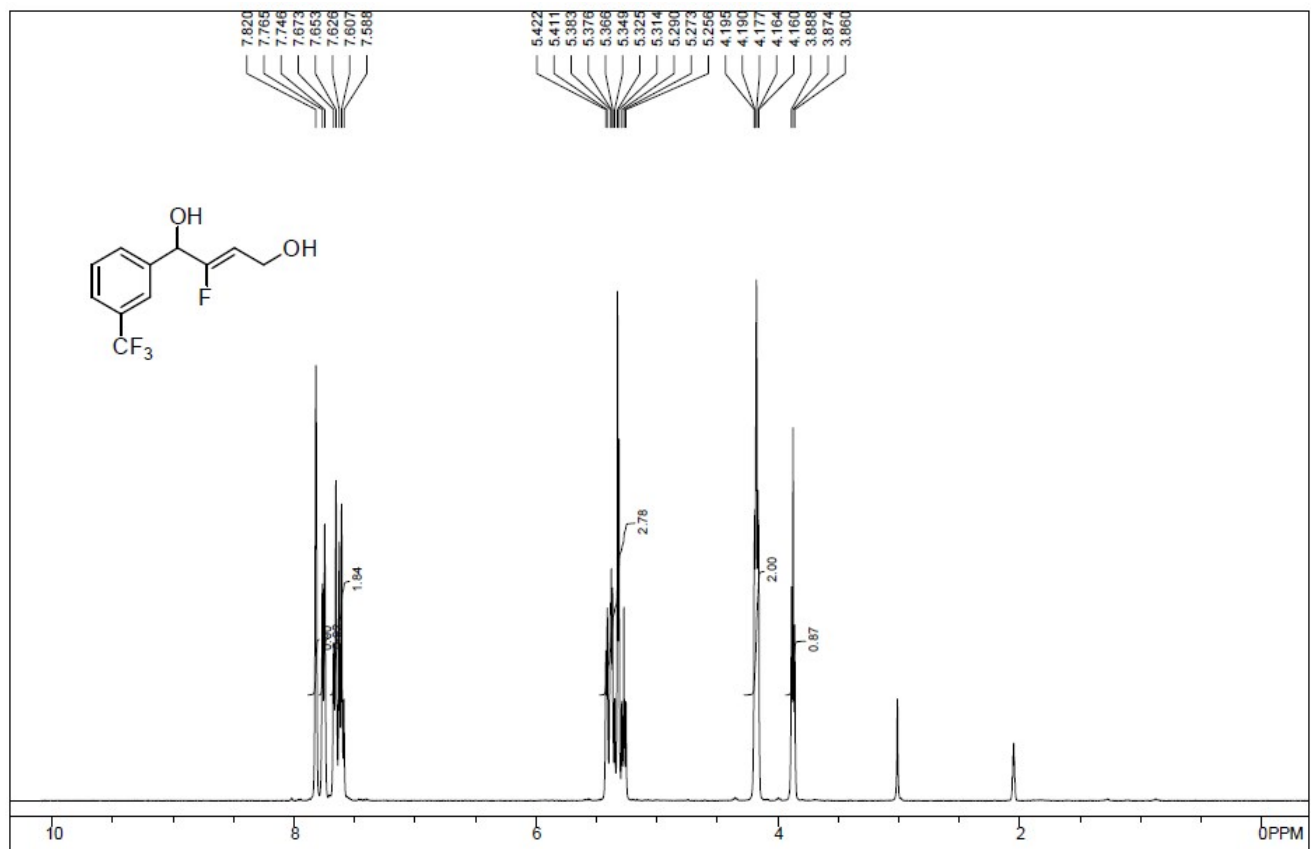

$^{13}\text{C}$  NMR spectrum of compound **2d**

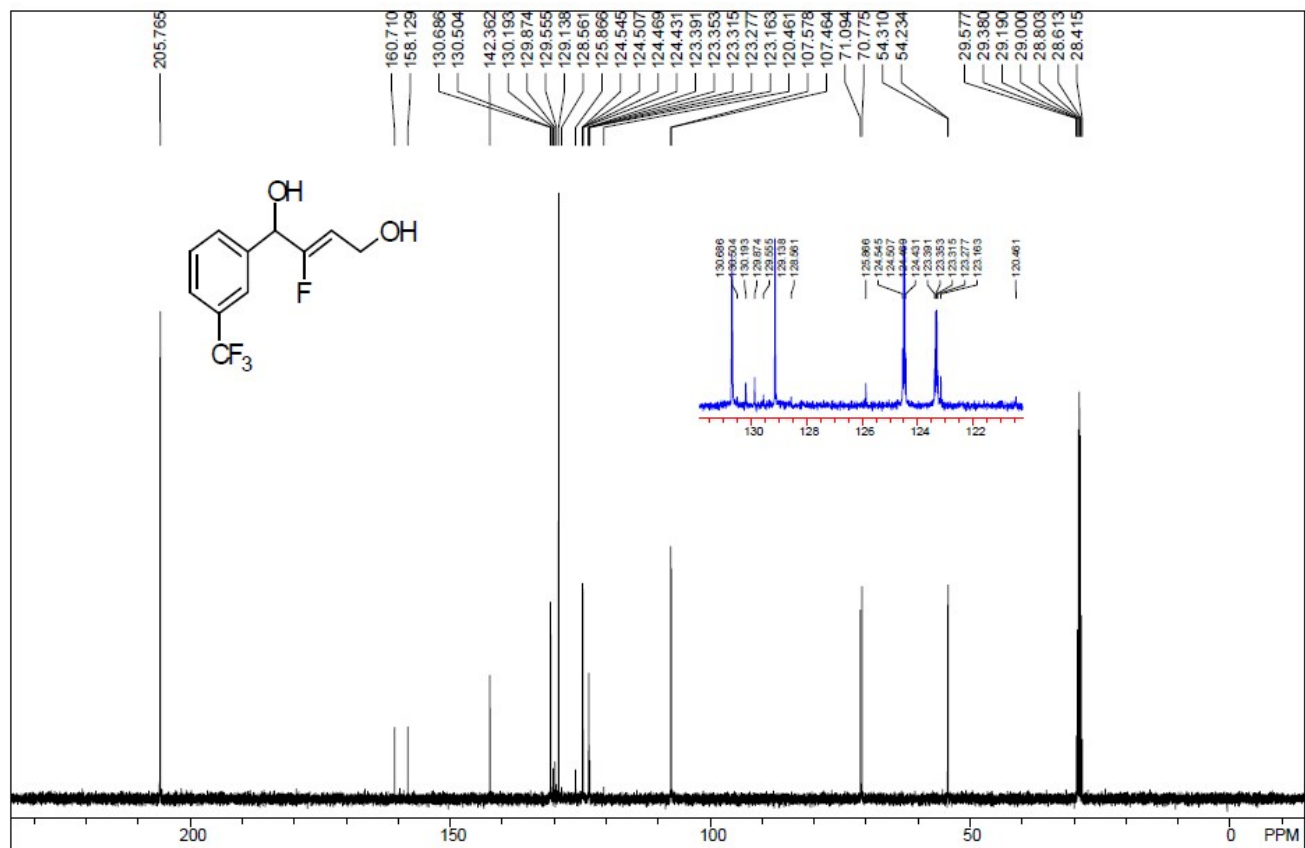

$^{19}\text{F}$  NMR spectrum of compound **2d**

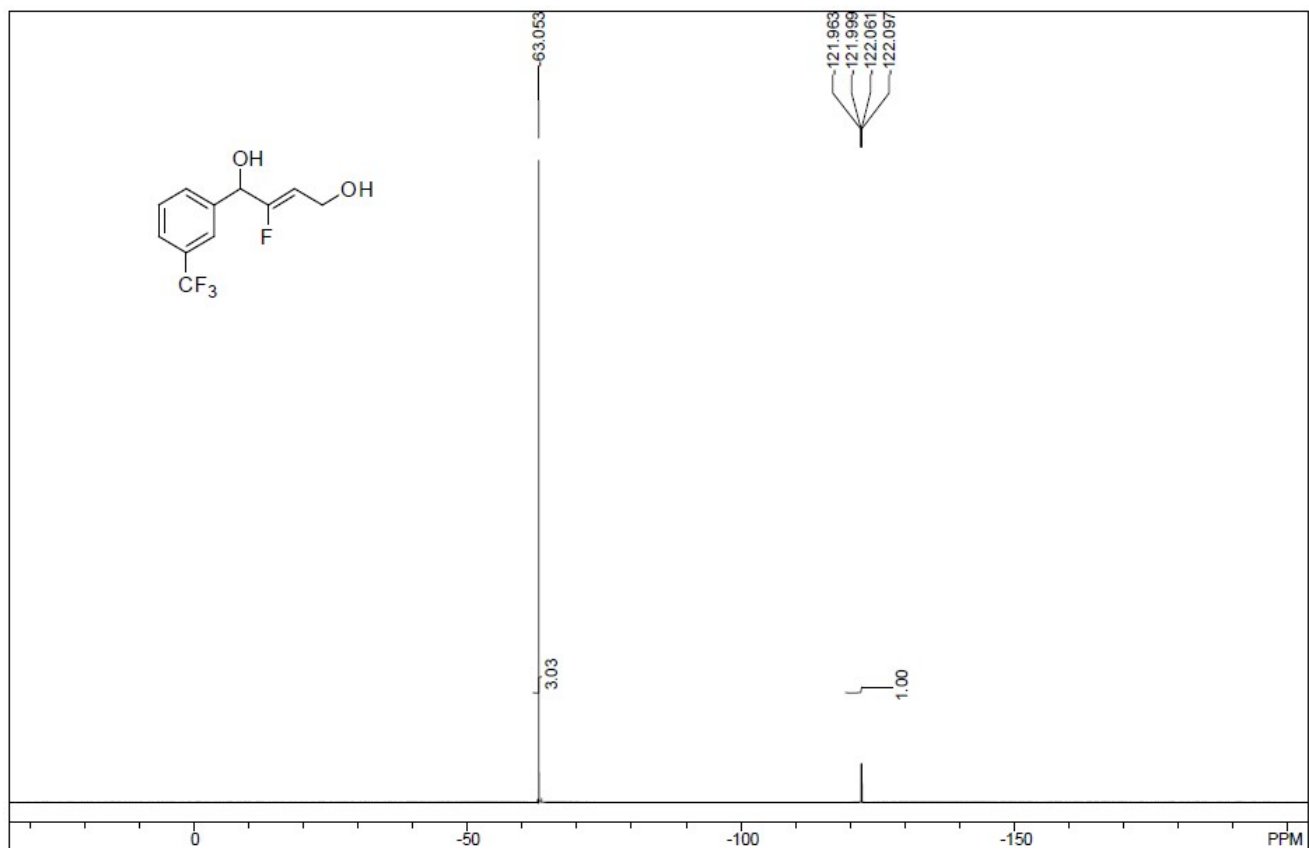

$^1\text{H}$  NMR spectrum of compound **2e**

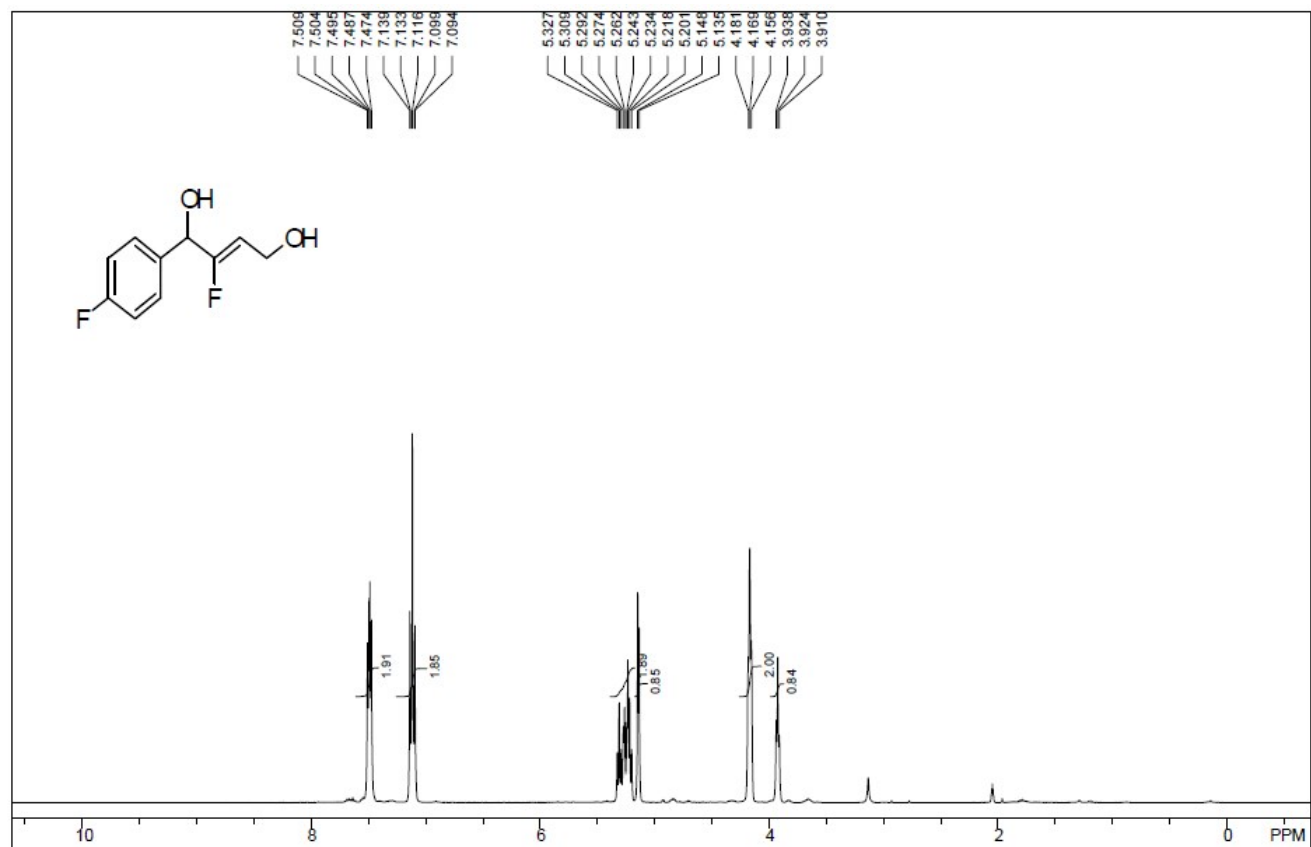

$^{13}\text{C}$  NMR spectrum of compound **2e**

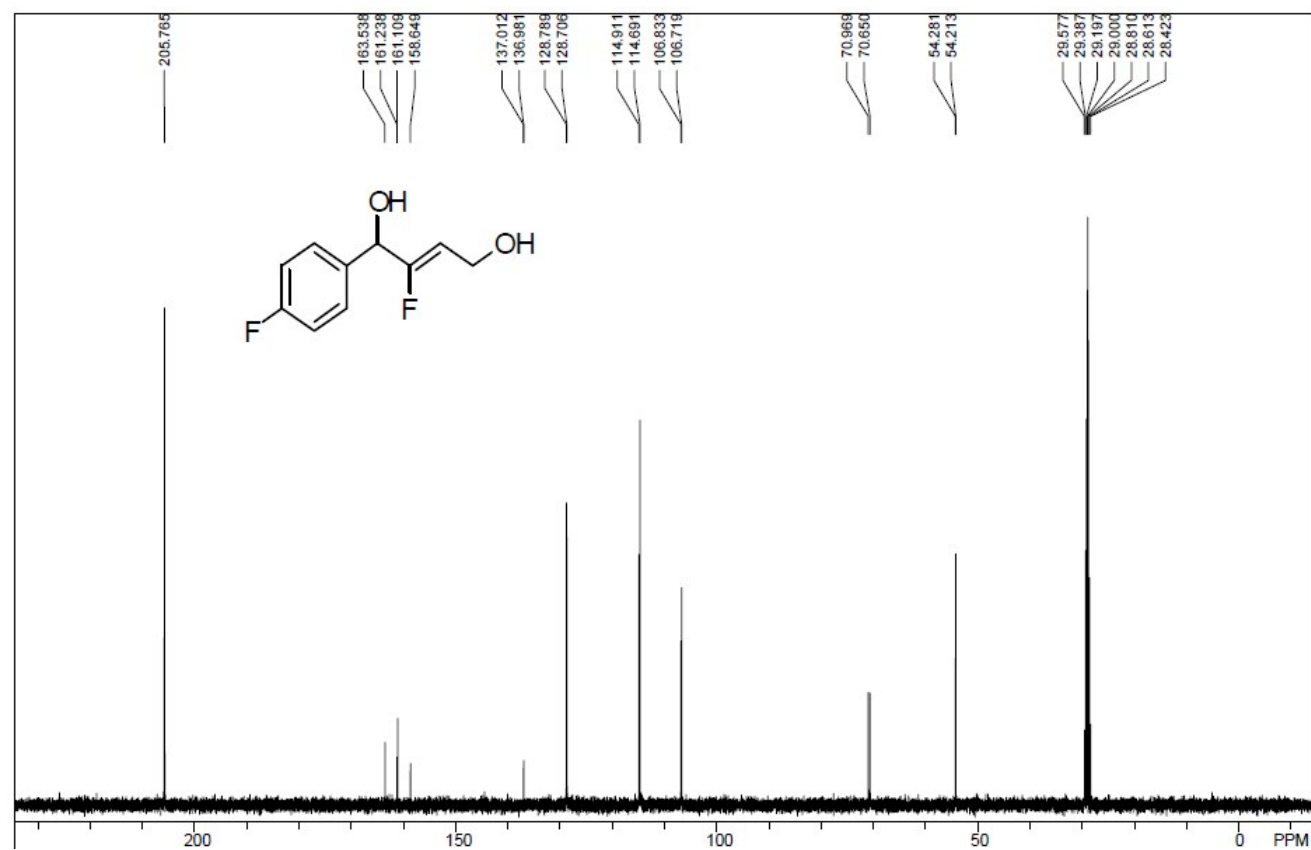

<sup>19</sup>F NMR spectrum of compound **2e**

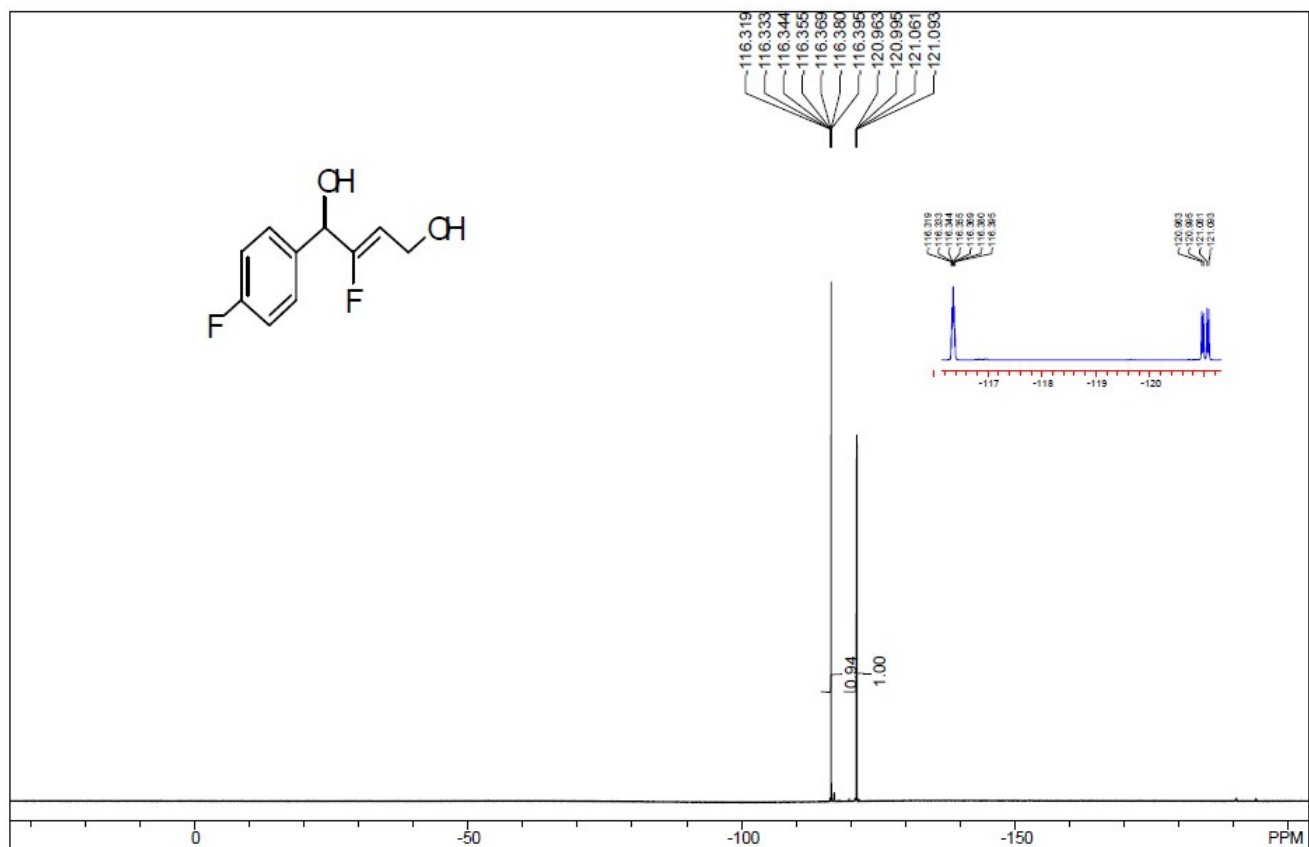

<sup>1</sup>H NMR spectrum of compound **2g**

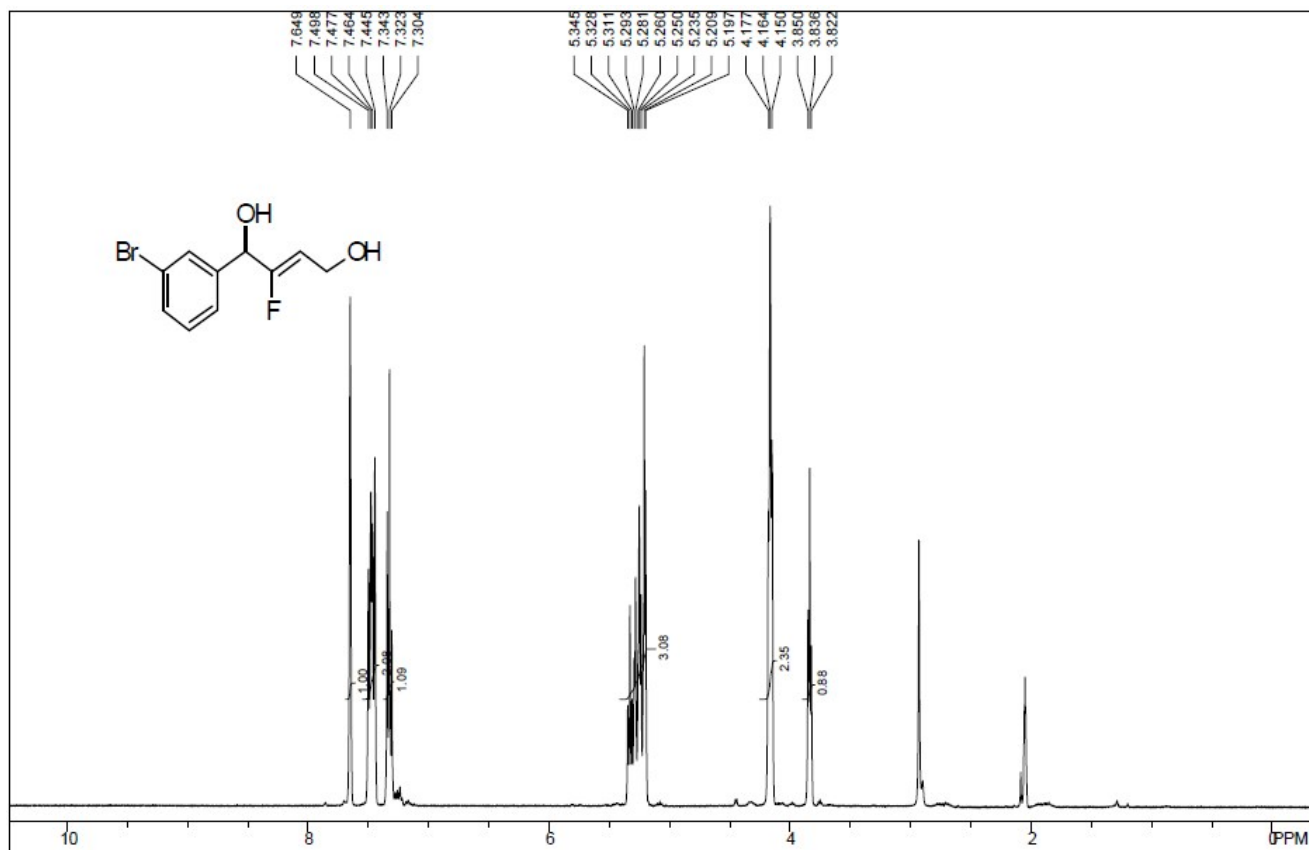



$^{13}\text{C}$  NMR spectrum of compound **2g**

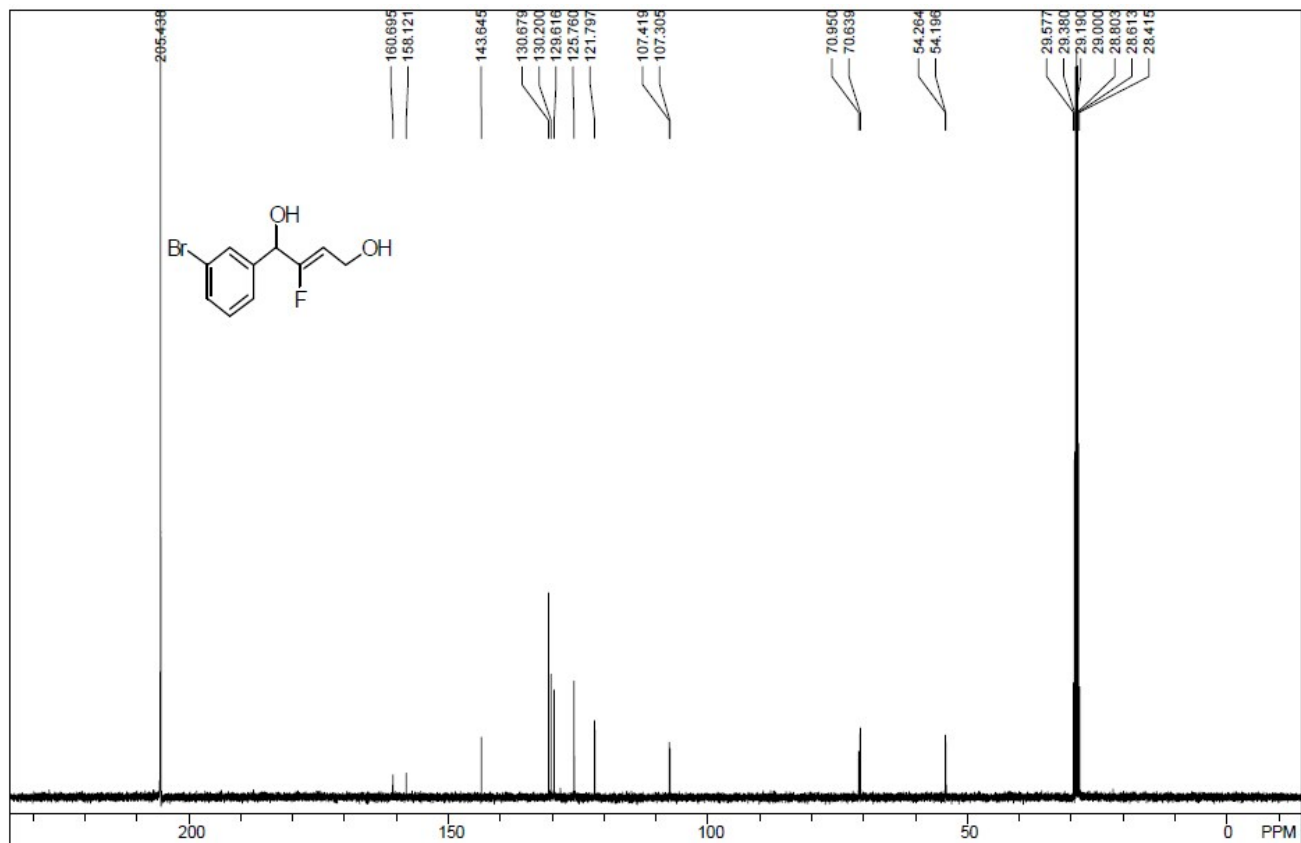

$^{19}\text{F}$  NMR spectrum of compound **2g**

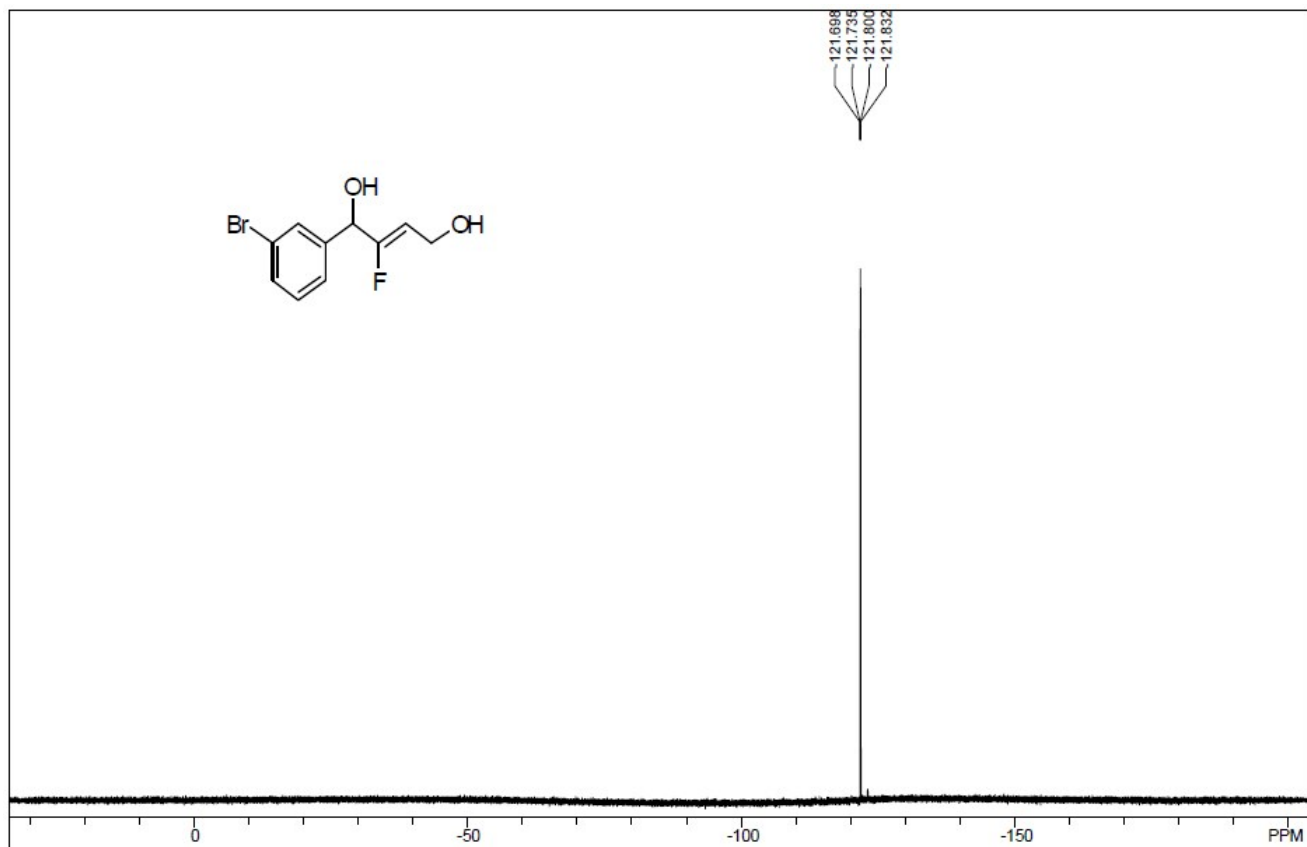

<sup>1</sup>H NMR spectrum of compound **2h**

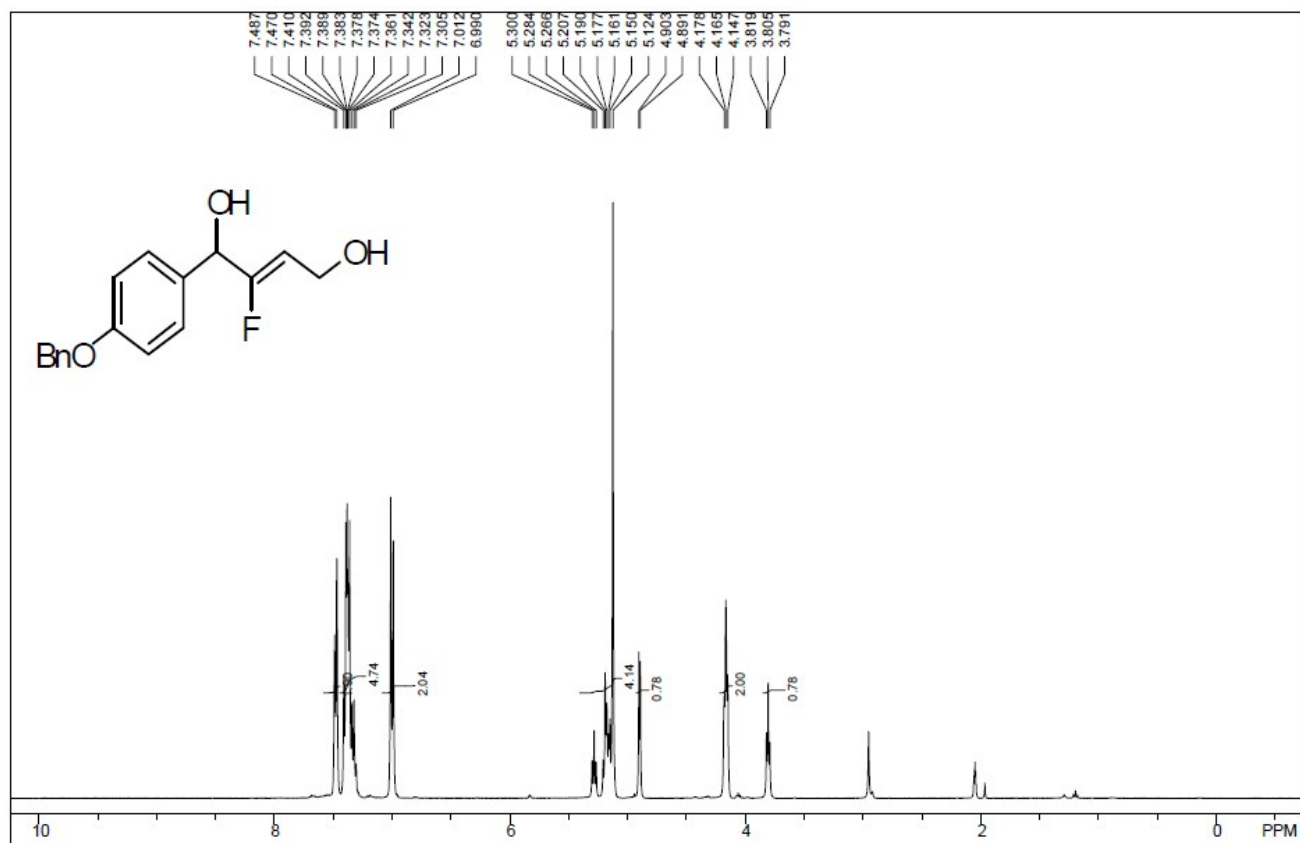

<sup>13</sup>C NMR spectrum of compound **2h**

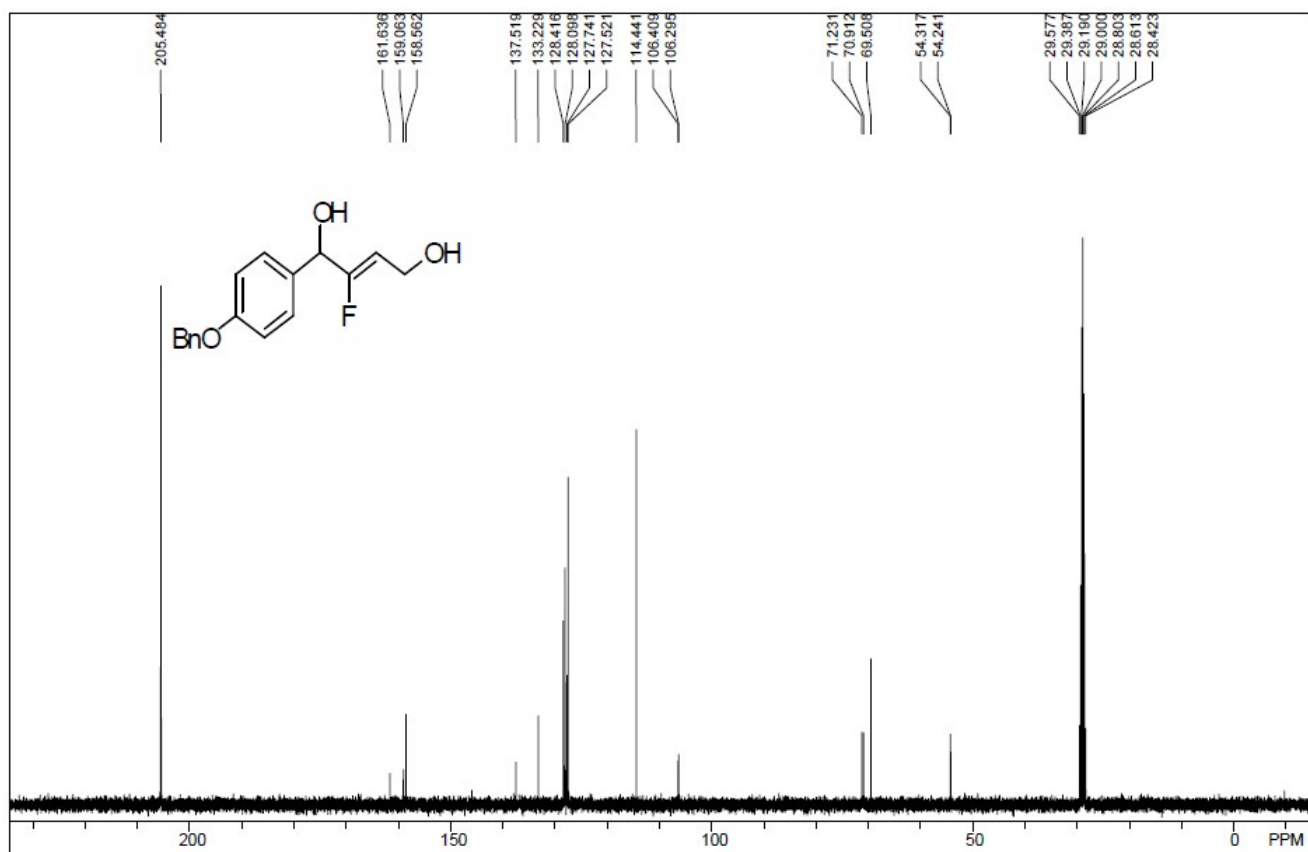

$^{19}\text{F}$  NMR spectrum of compound **2h**

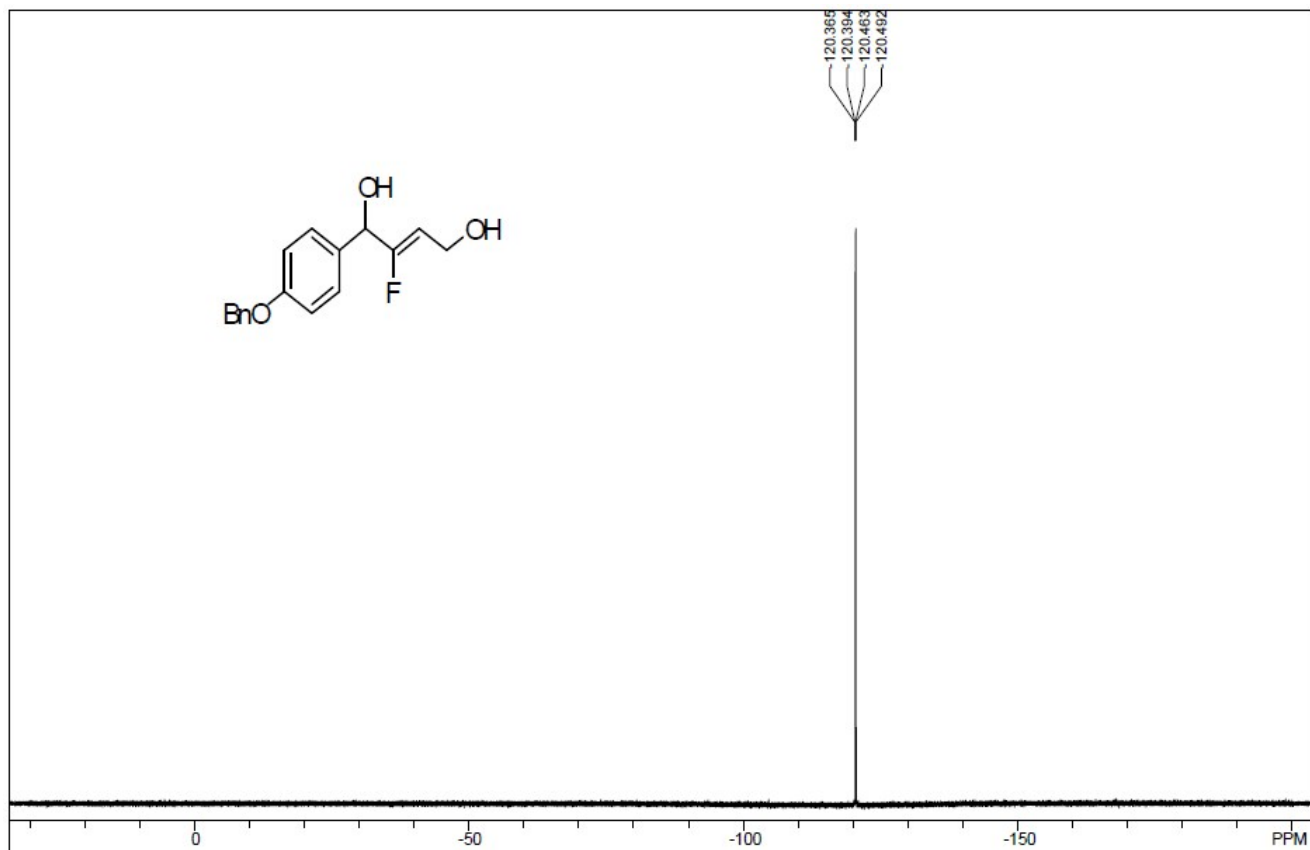

$^1\text{H}$  NMR spectrum of compound **2j**

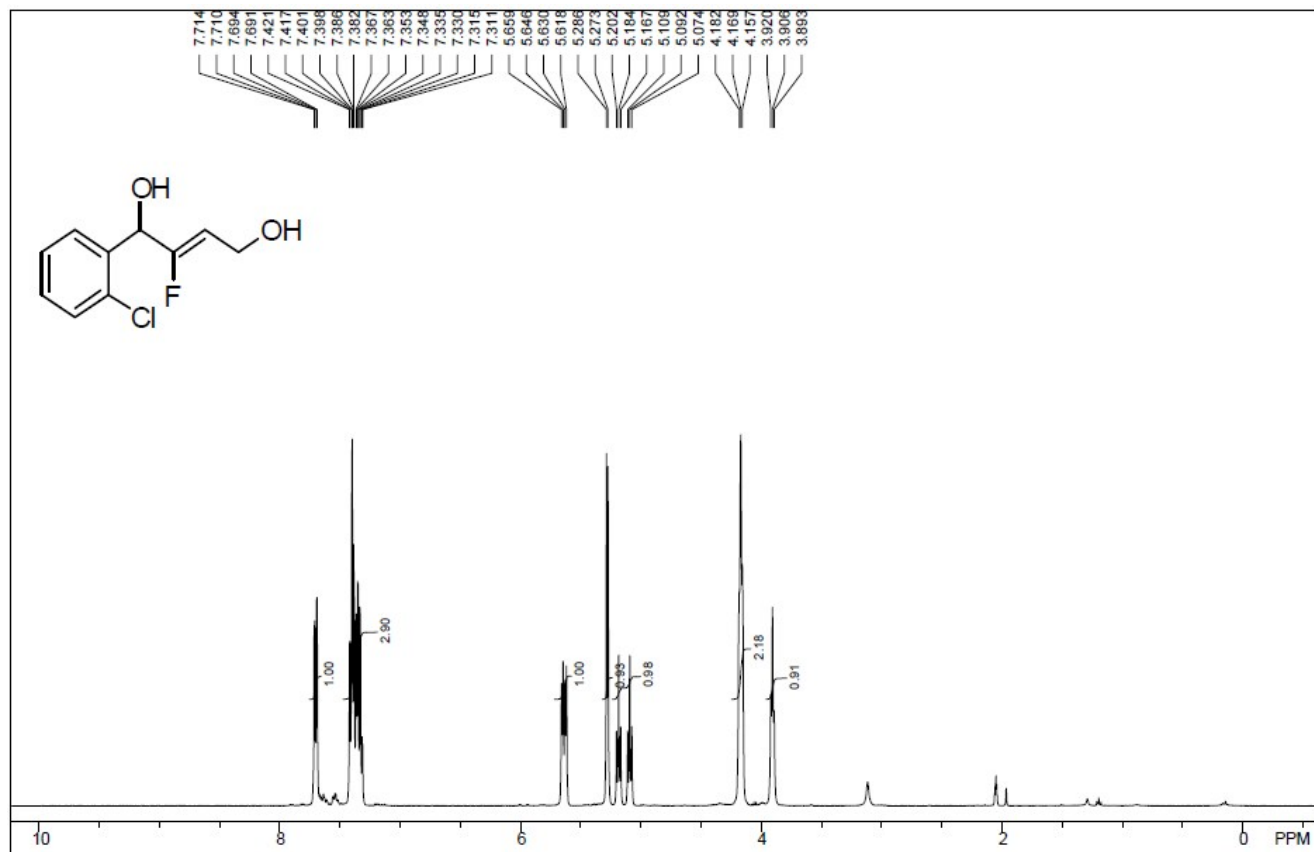

$^{13}\text{C}$  NMR spectrum of compound **2j**

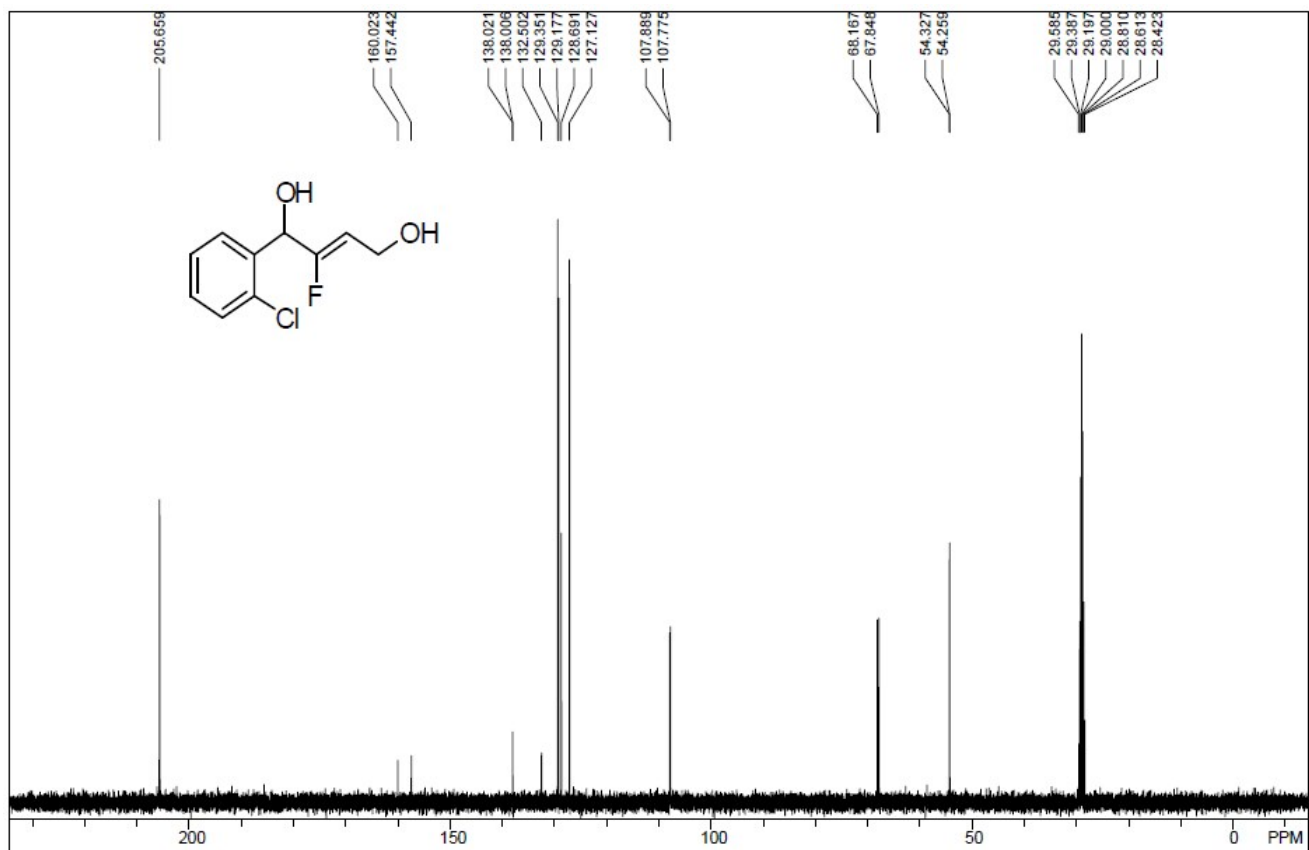

$^{19}\text{F}$  NMR spectrum of compound **2j**

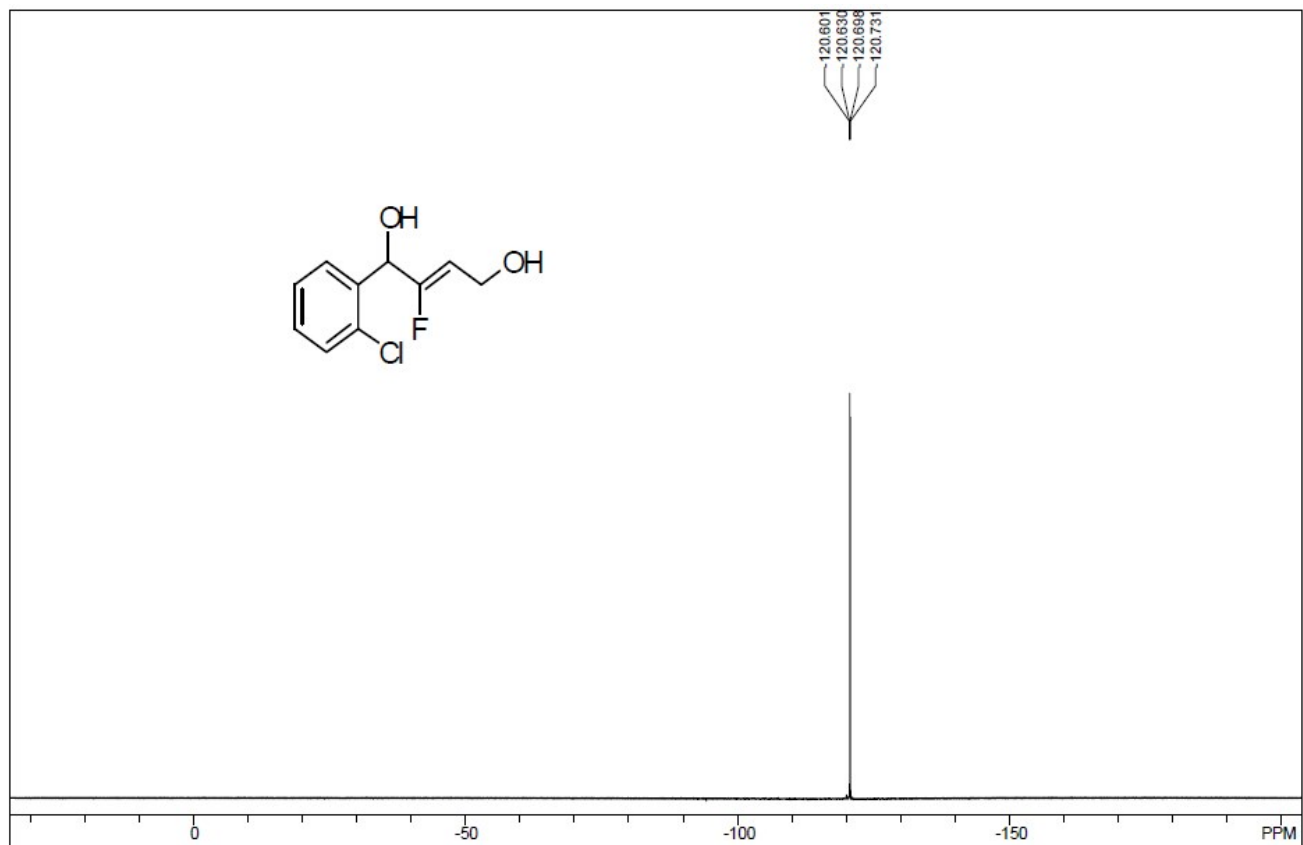

$^1\text{H}$  NMR spectrum of compound **2k**

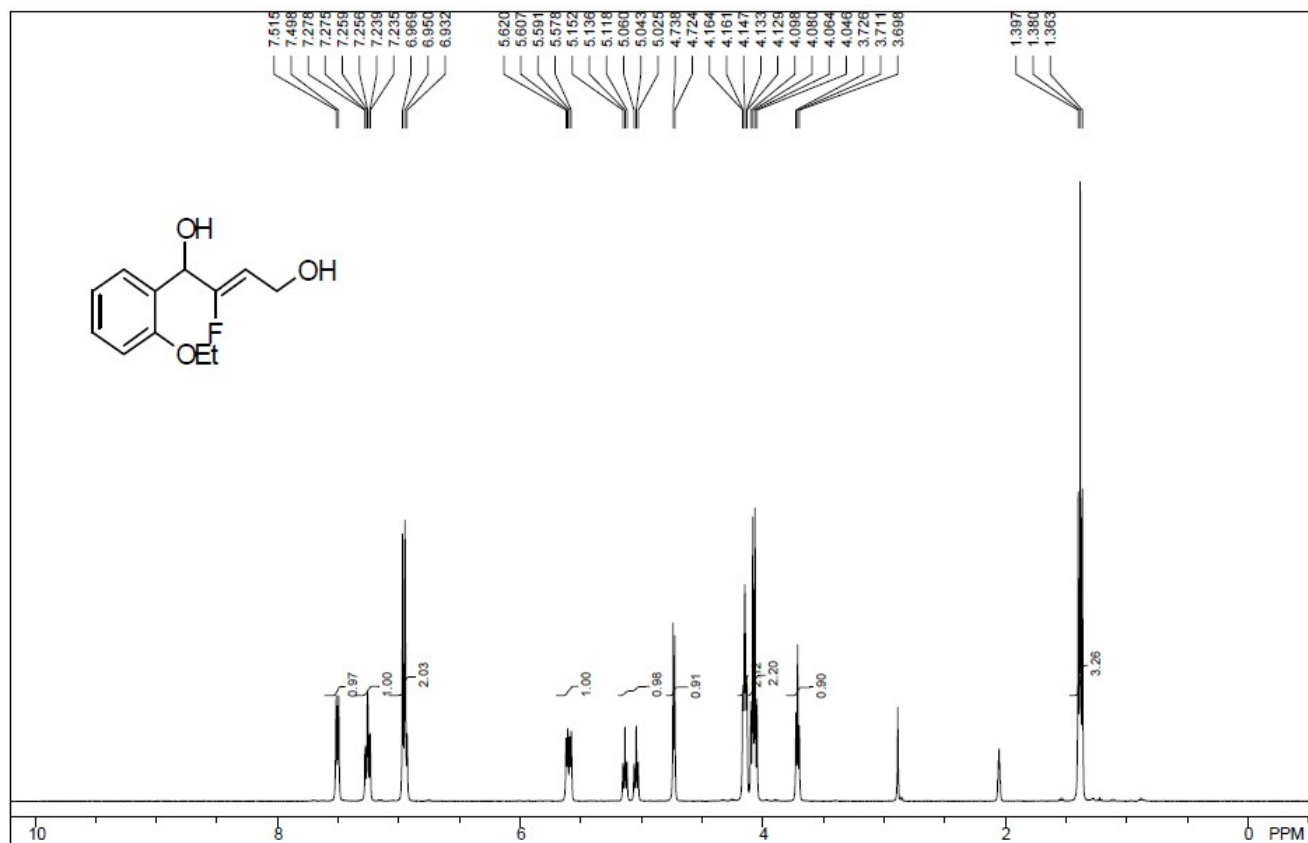

$^{13}\text{C}$  NMR spectrum of compound **2k**

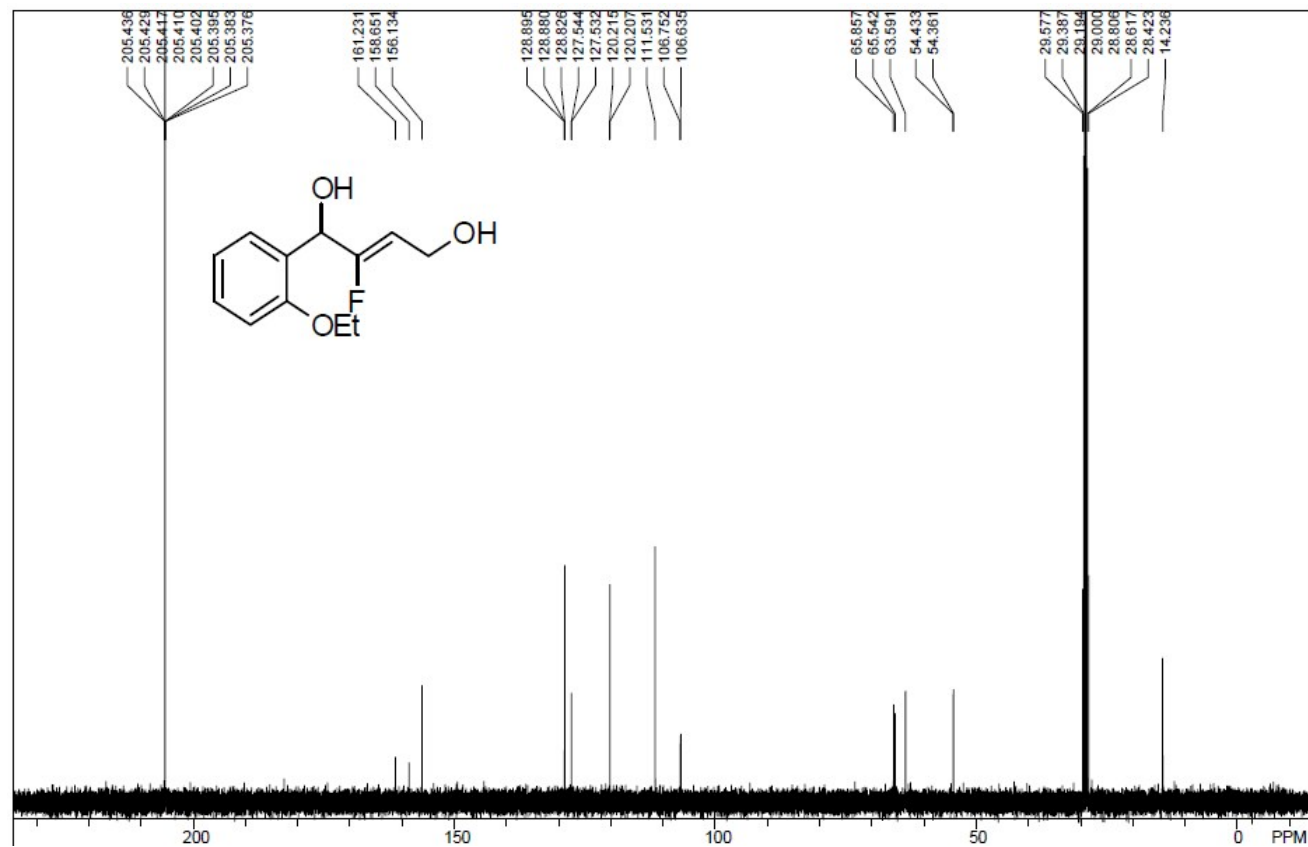

$^{19}\text{F}$  NMR spectrum of compound **2k**

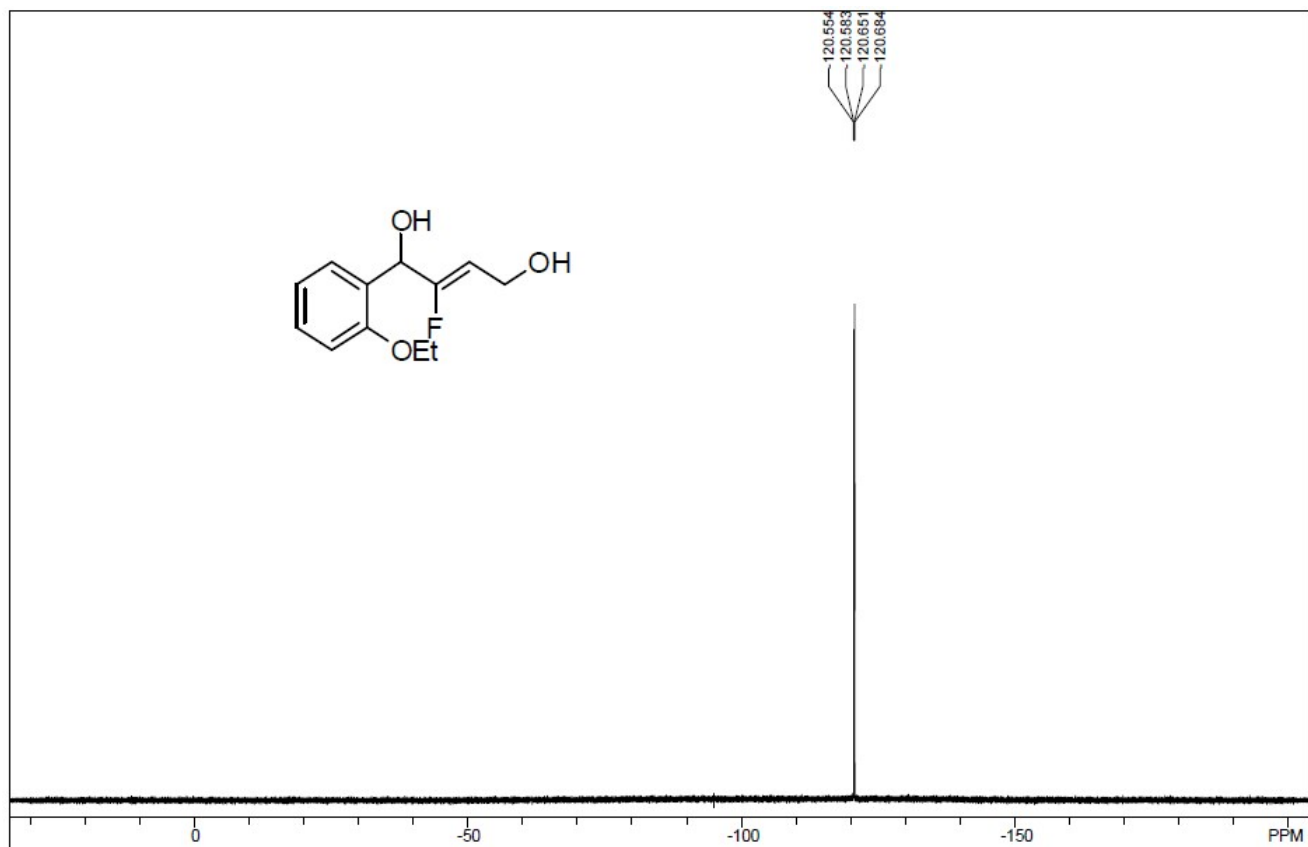

$^1\text{H}$  NMR spectrum of compound **2l**

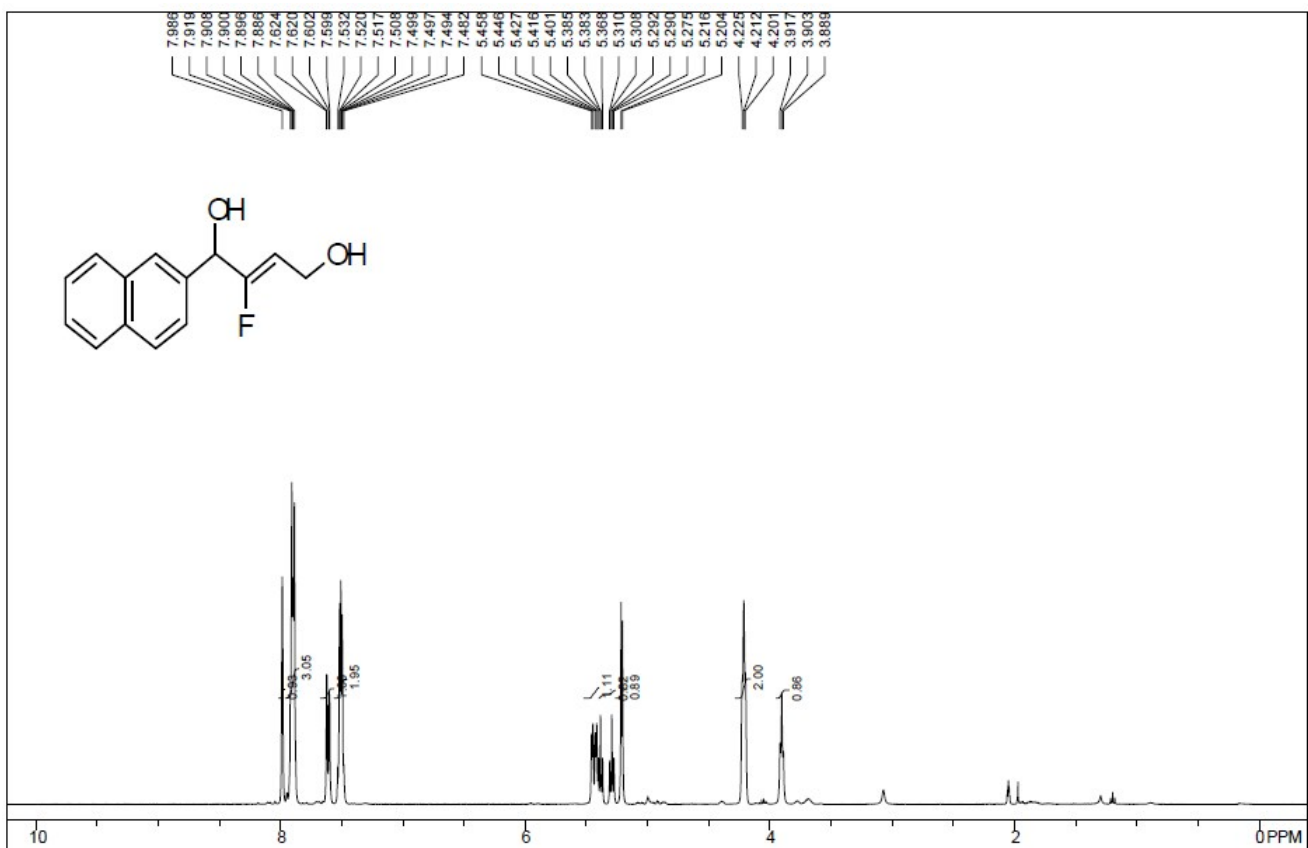

<sup>13</sup>C NMR spectrum of compound **21**

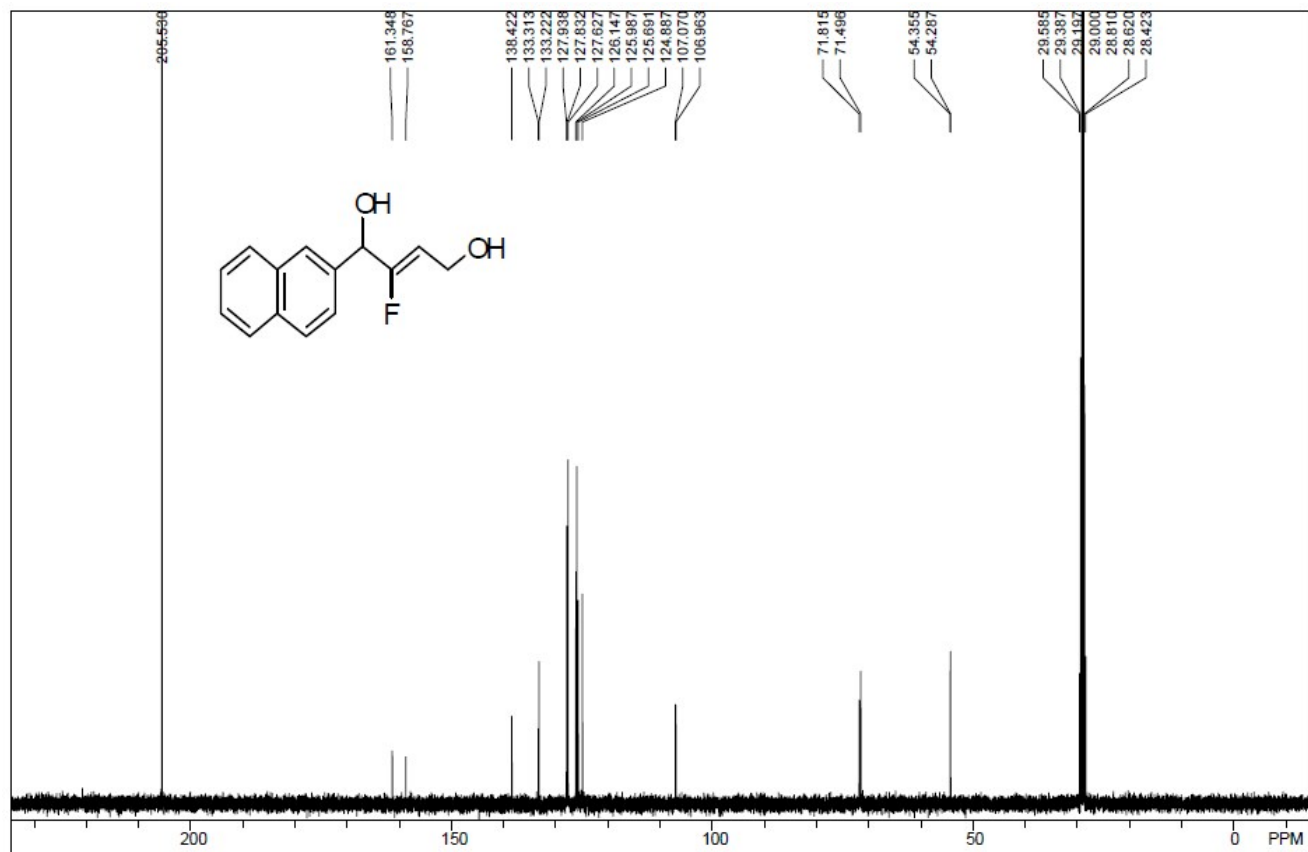

<sup>19</sup>F NMR spectrum of compound **21**

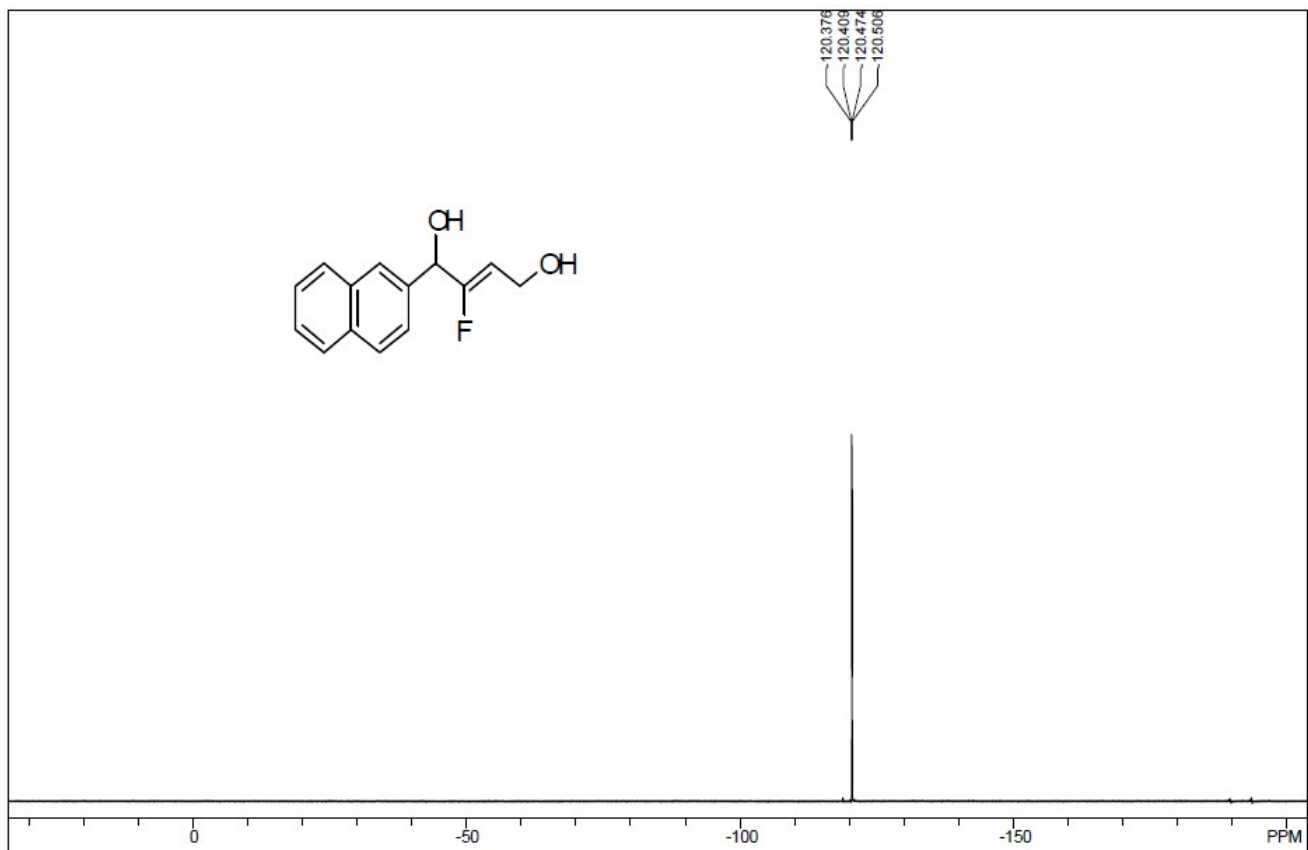

<sup>1</sup>H NMR spectrum of compound **2m**

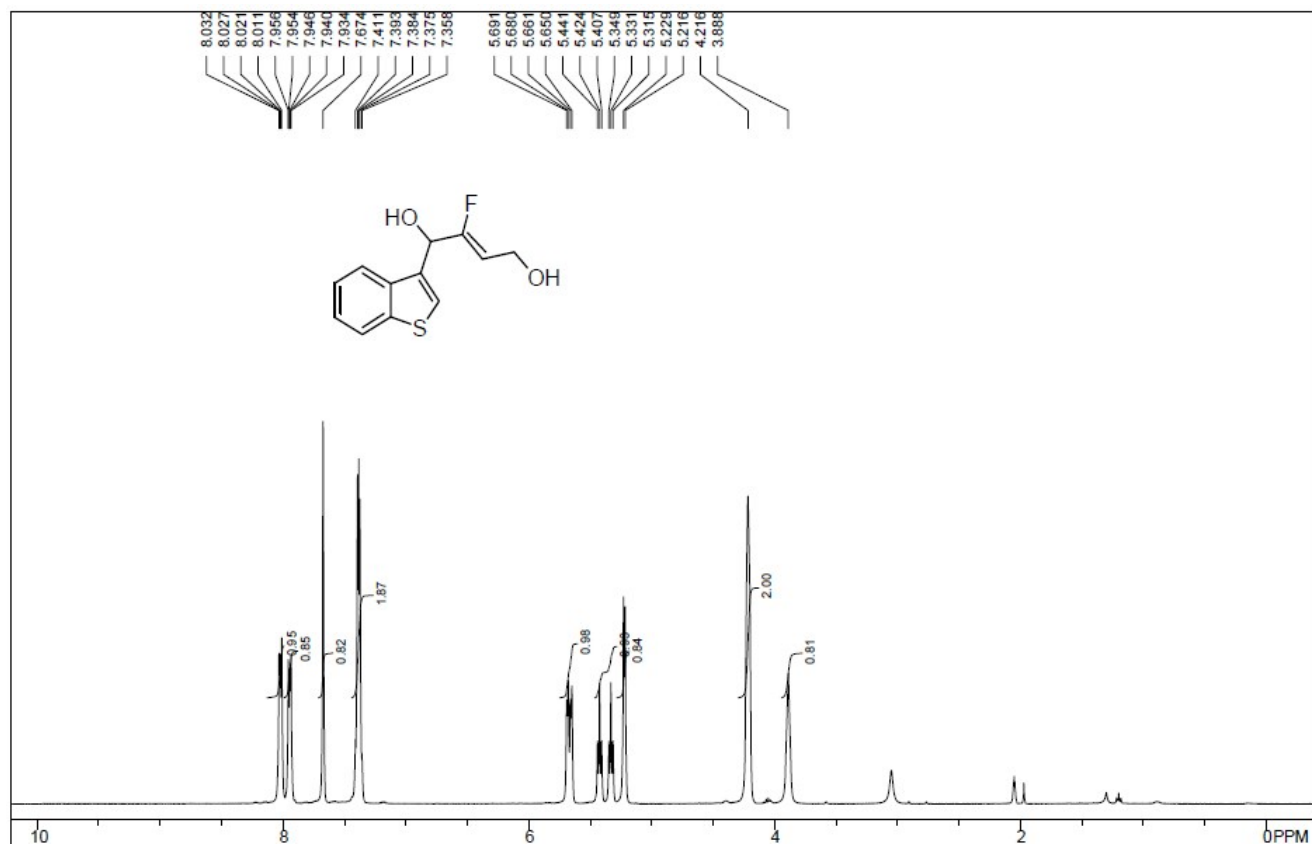

<sup>13</sup>C NMR spectrum of compound **2m**

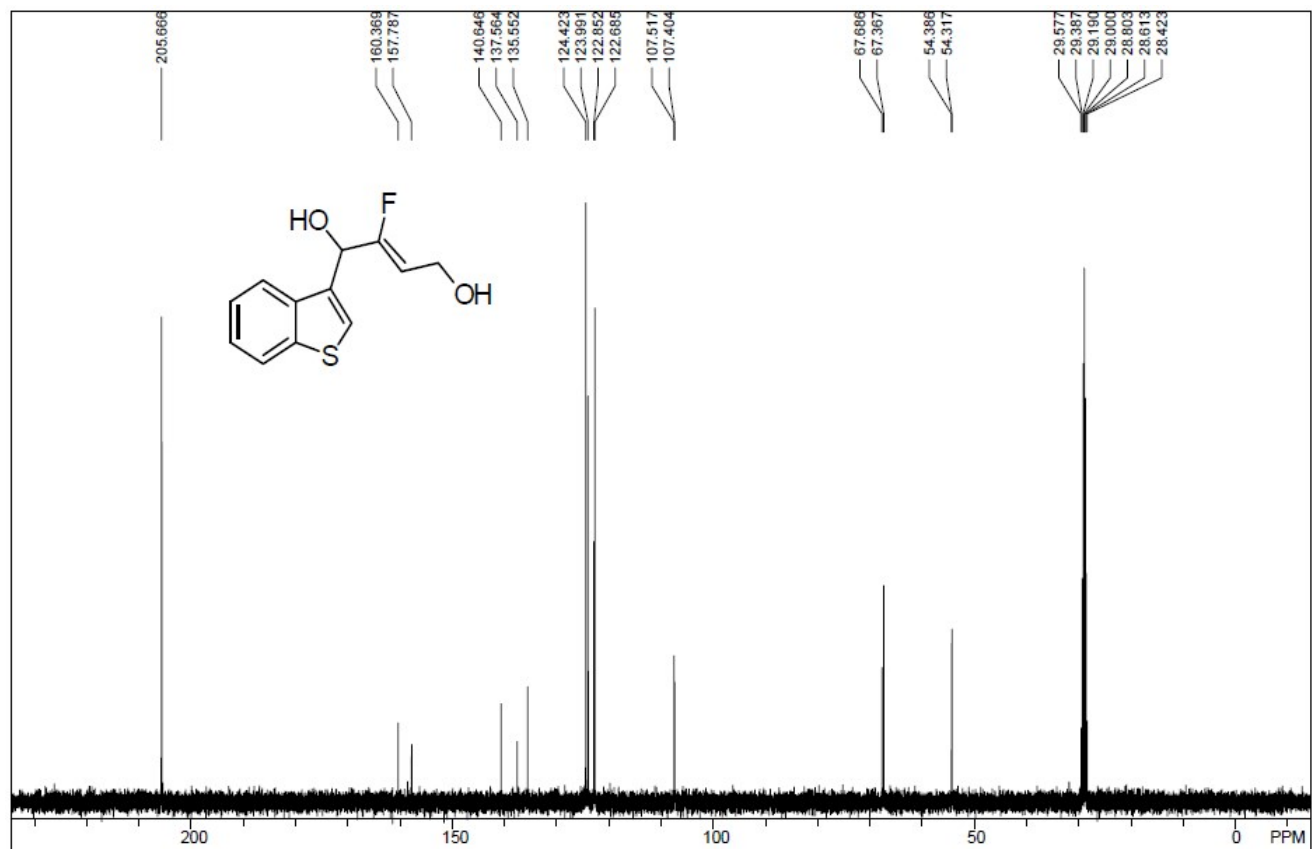



$^{19}\text{F}$  NMR spectrum of compound **2m**

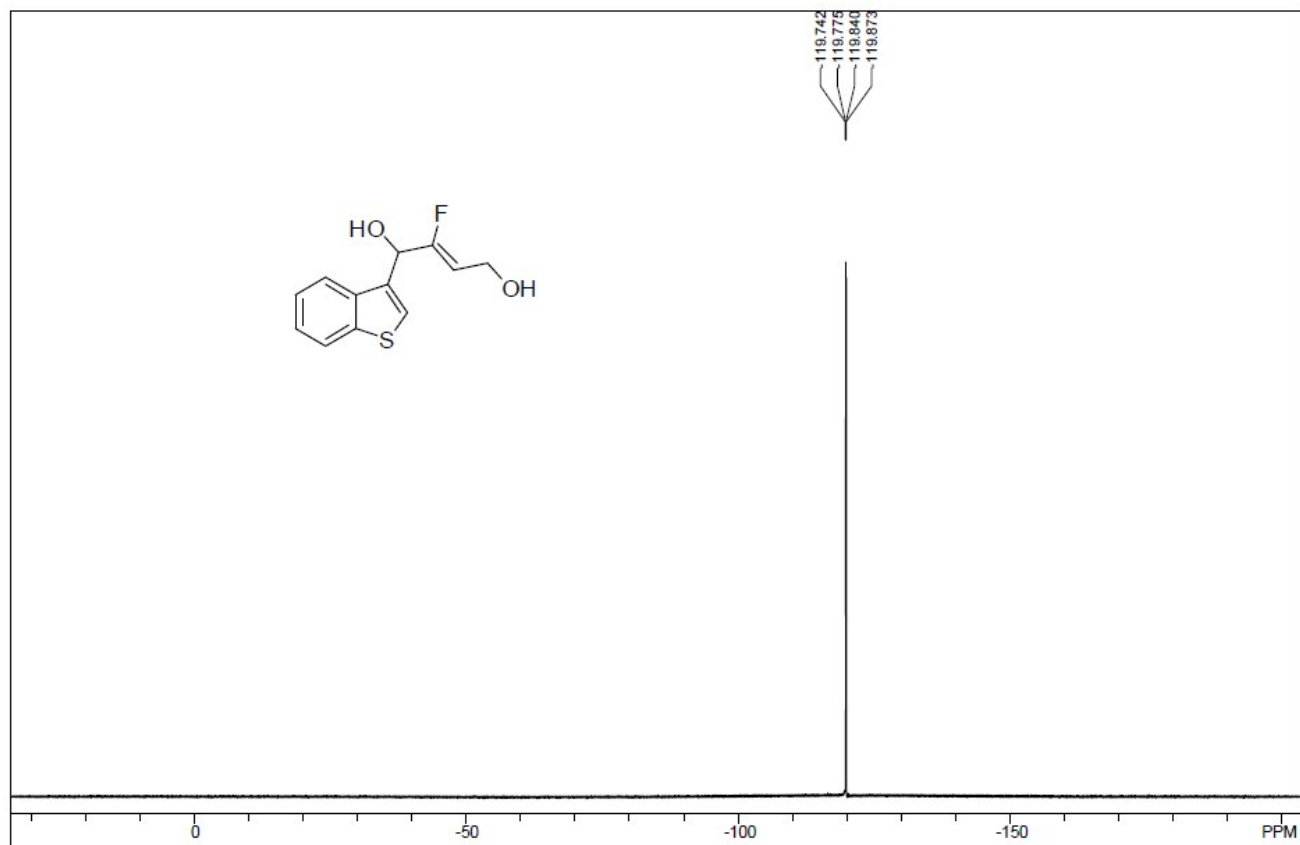

$^1\text{H}$  NMR spectrum of compound **2n**

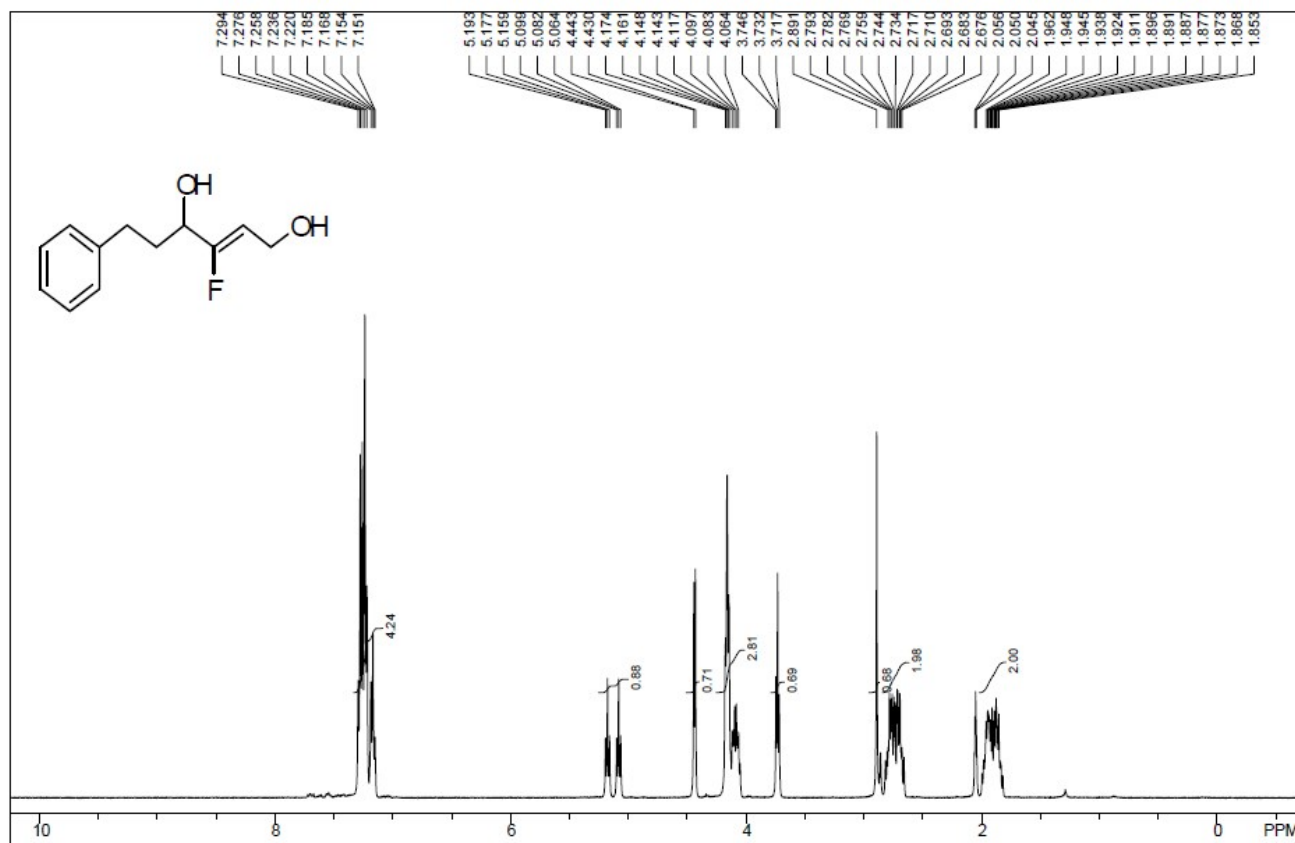

### <sup>13</sup>C NMR spectrum of compound **2n**

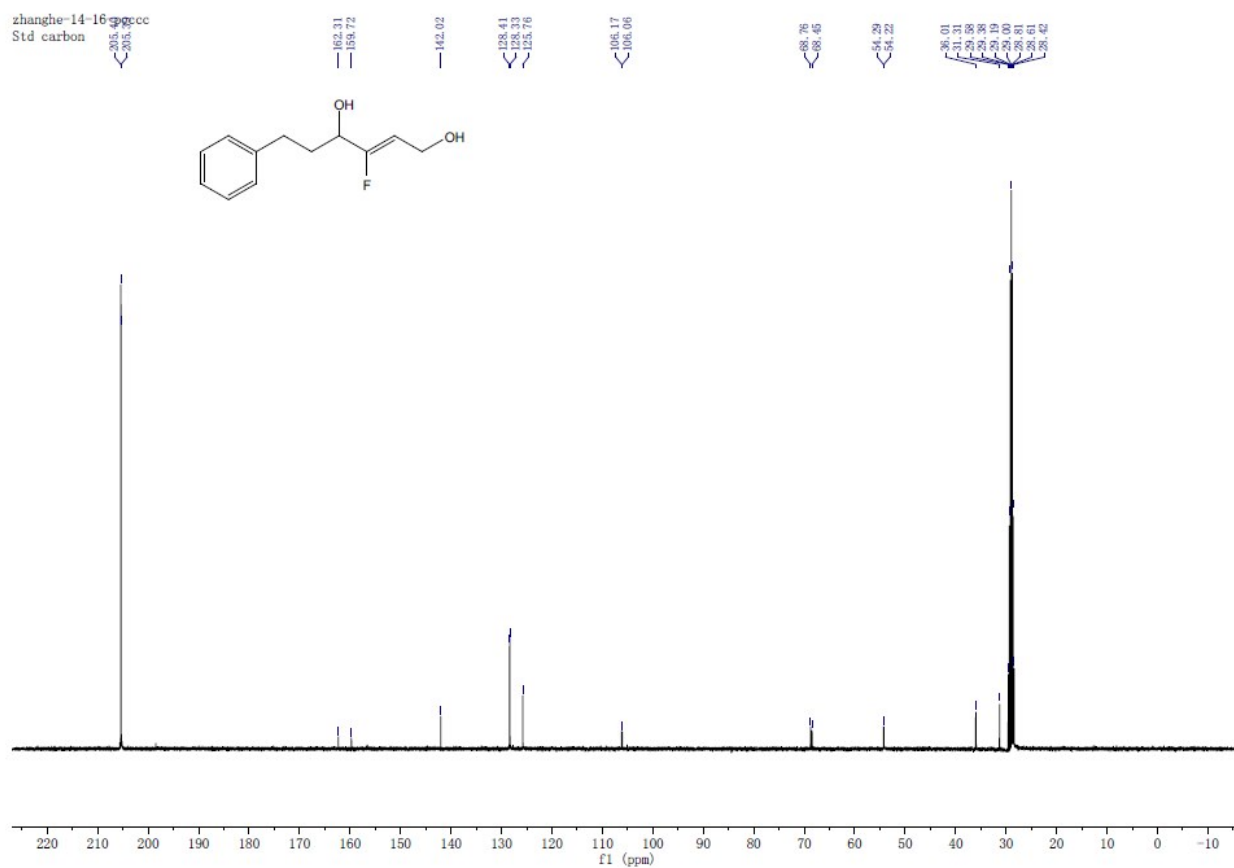

### <sup>19</sup>F NMR spectrum of compound **2n**

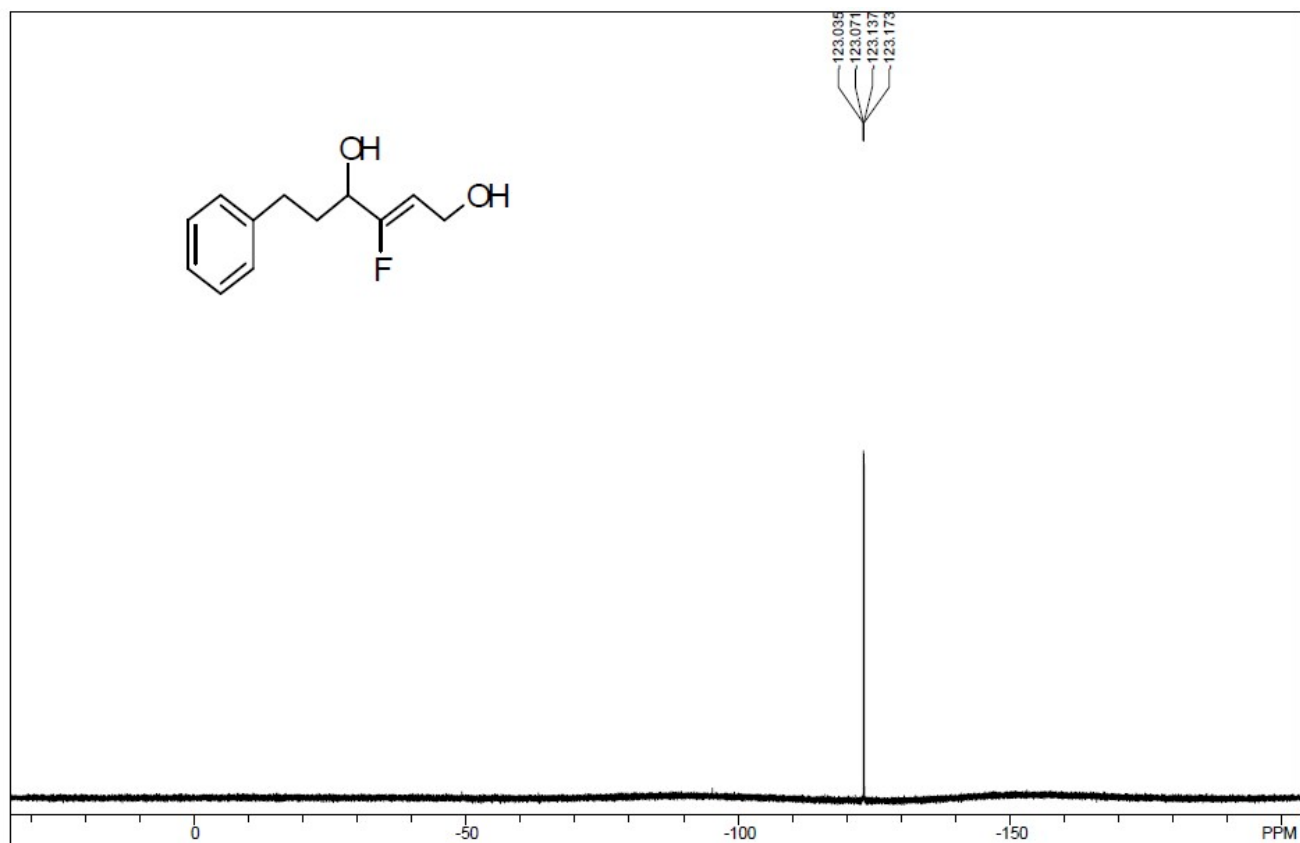

<sup>1</sup>H NMR spectrum of compound **2o**

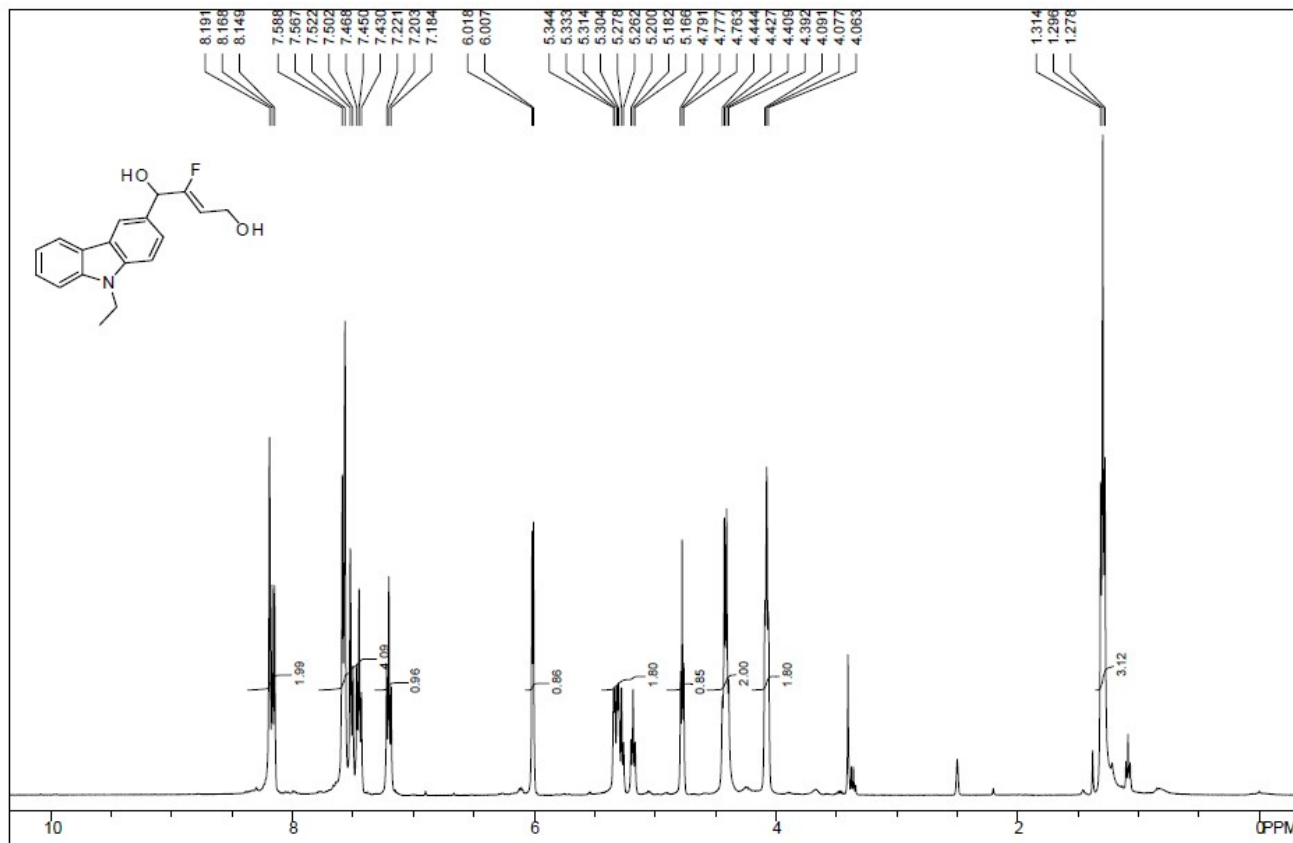

<sup>13</sup>C NMR spectrum of compound **2o**

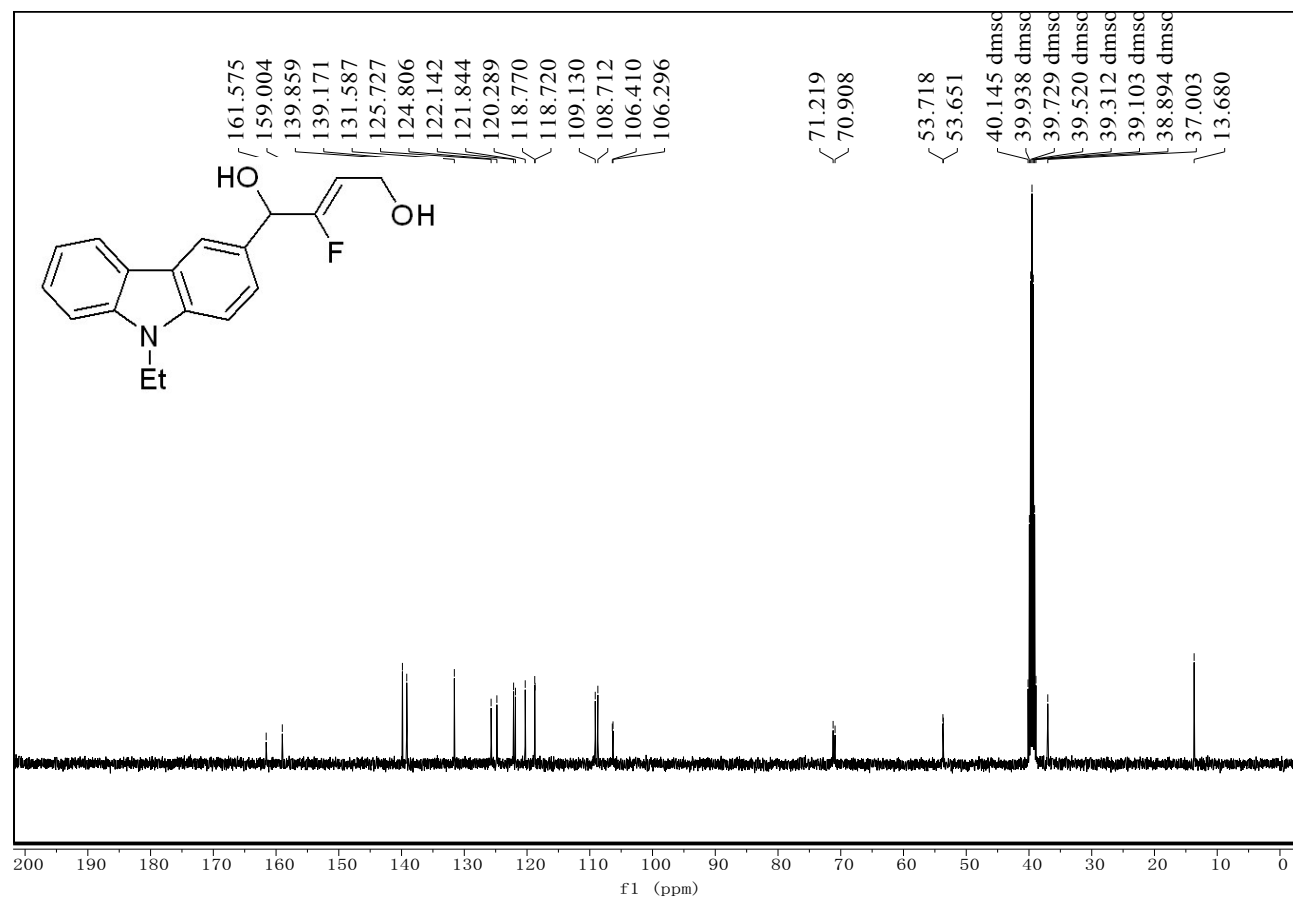

<sup>19</sup>F NMR spectrum of compound **2o**

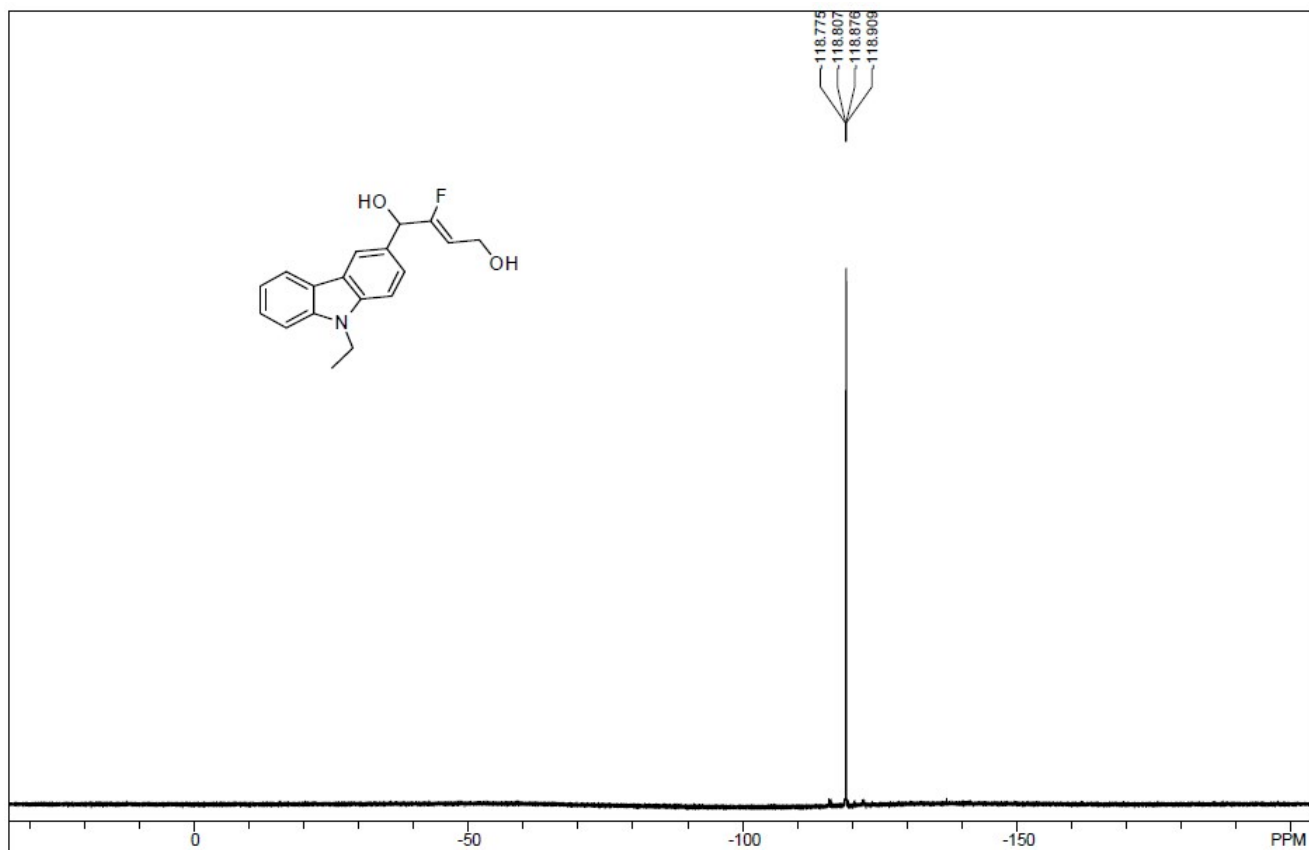

<sup>1</sup>H NMR spectrum of compound **2p**

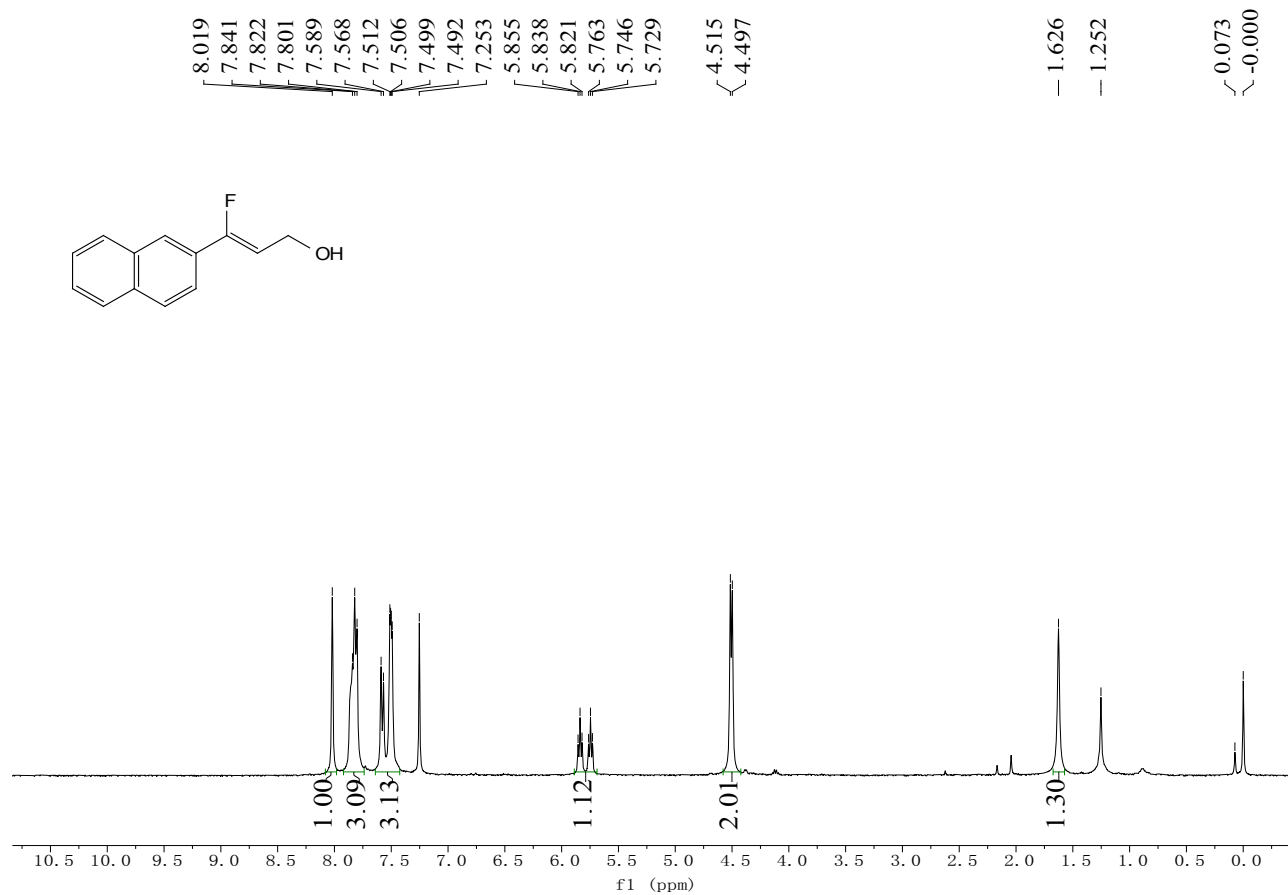

<sup>13</sup>C NMR spectrum of compound **2p**

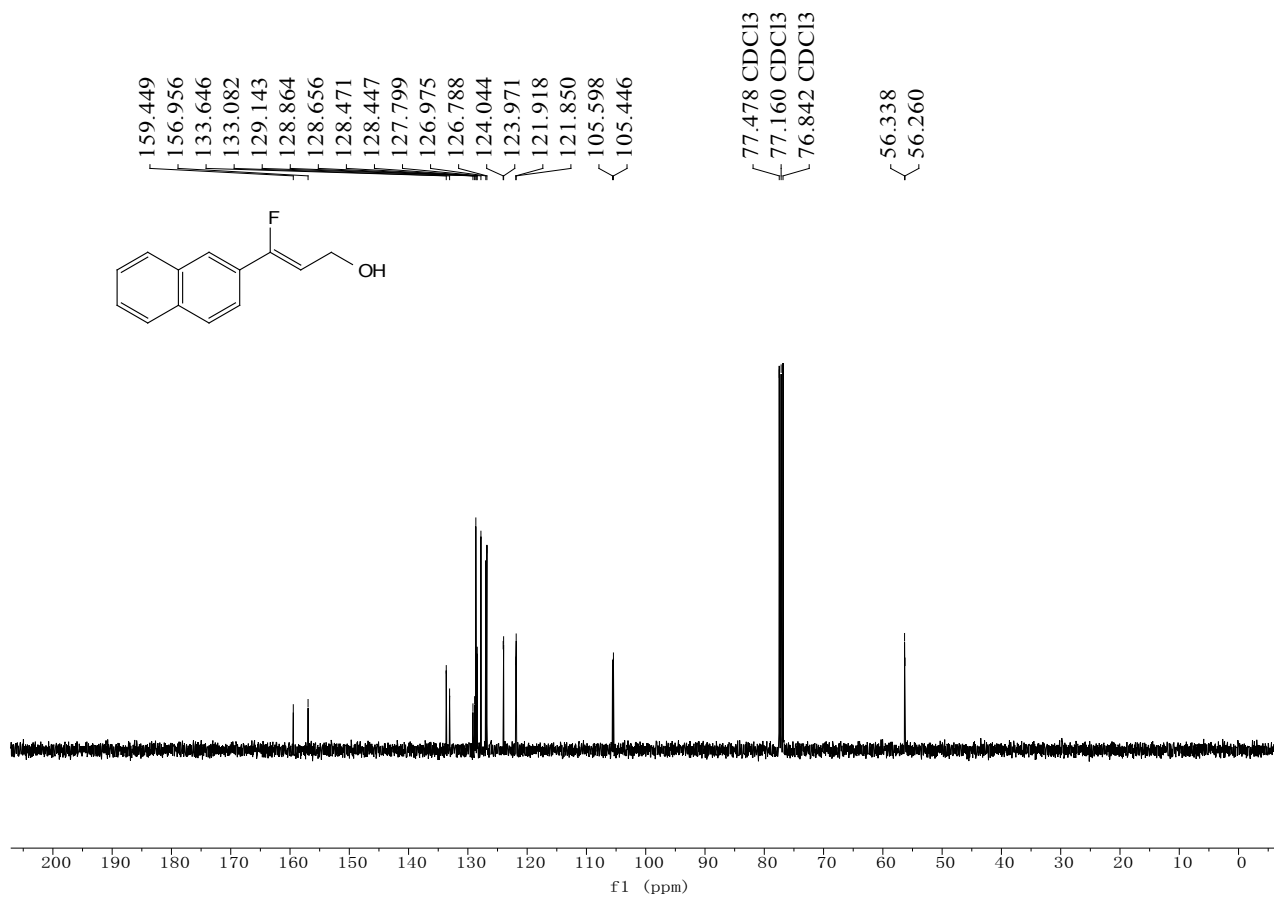

<sup>19</sup>F NMR spectrum of compound **2p**

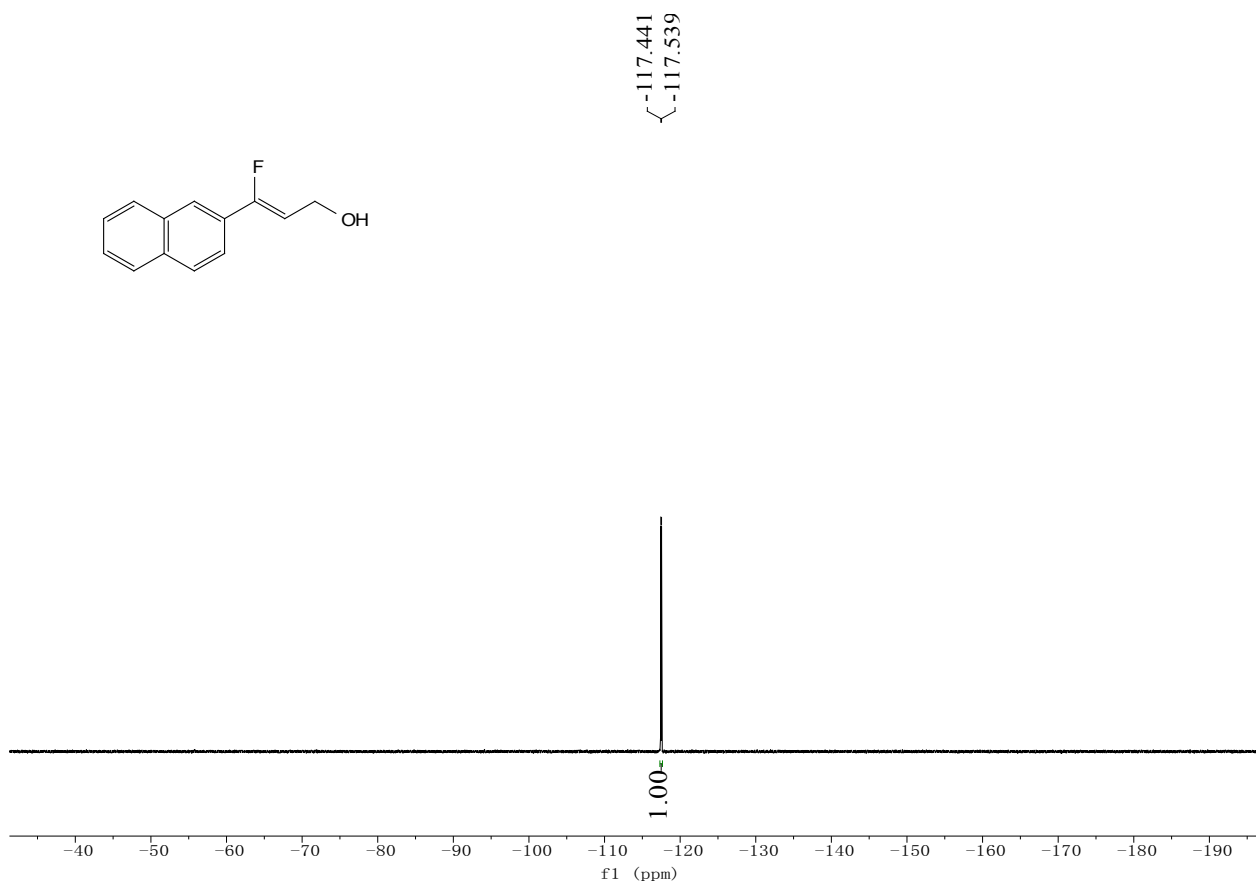

<sup>1</sup>H NMR spectrum of compound **2h**''

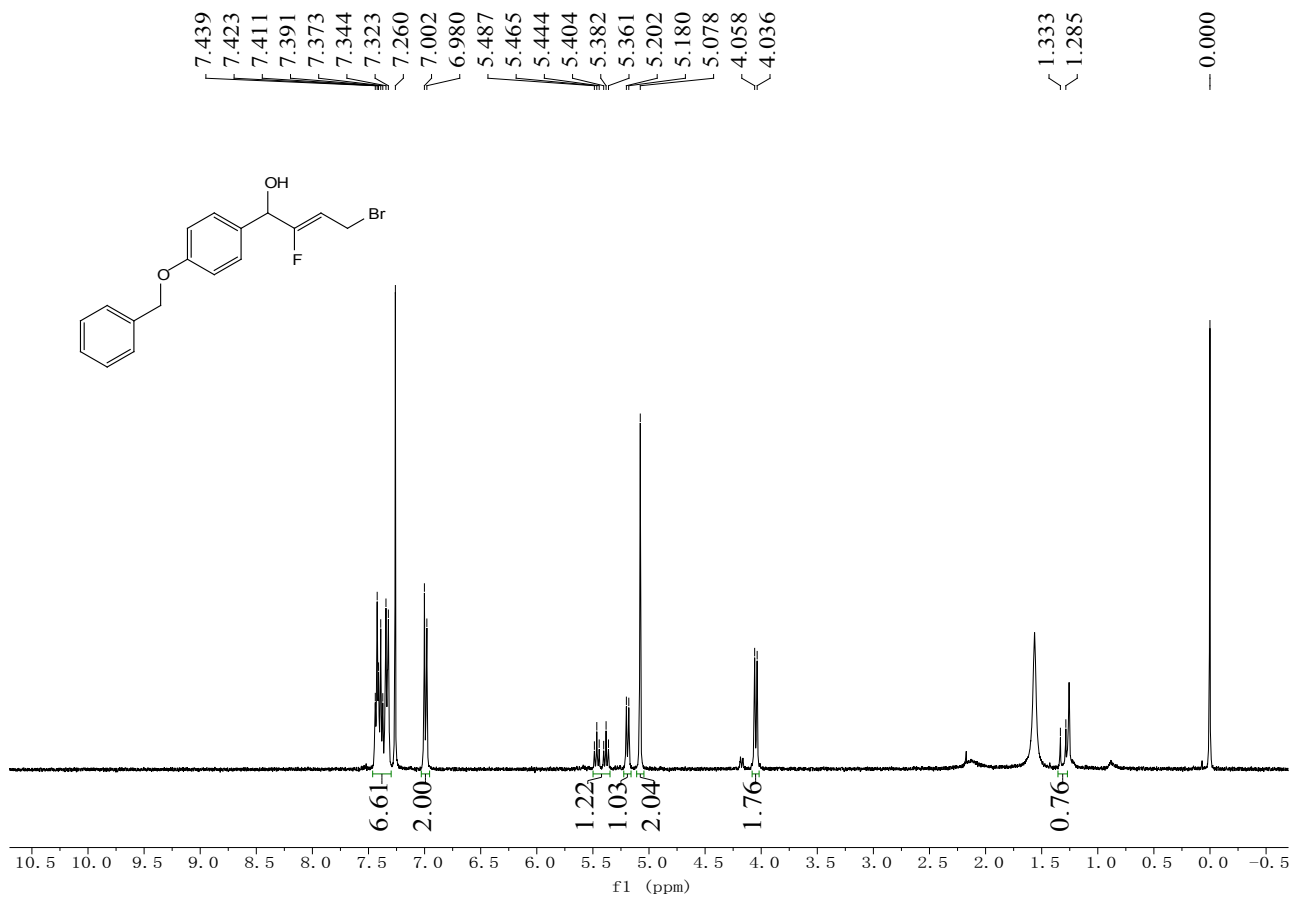

<sup>13</sup>C NMR spectrum of compound **2h**''

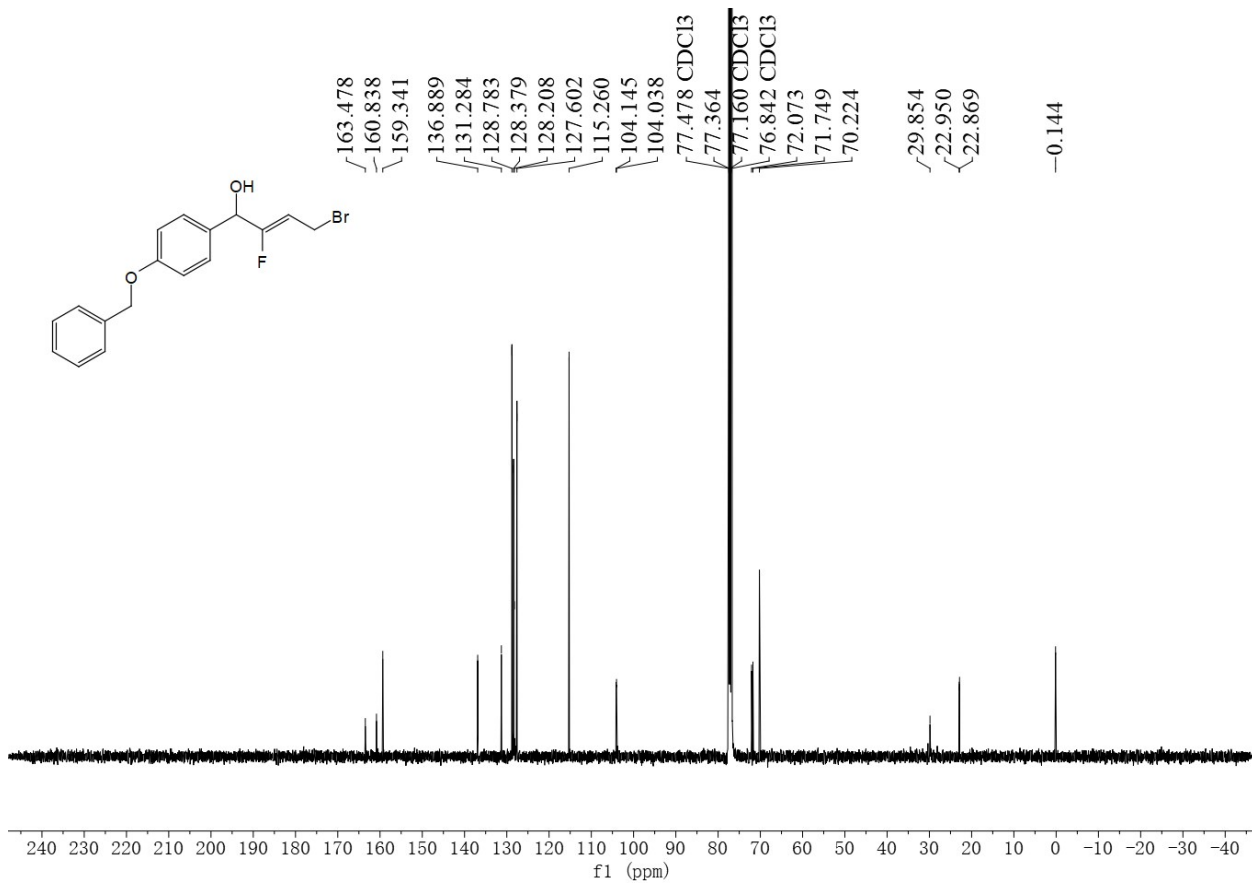

$^{19}\text{F}$  NMR spectrum of compound **2h''**

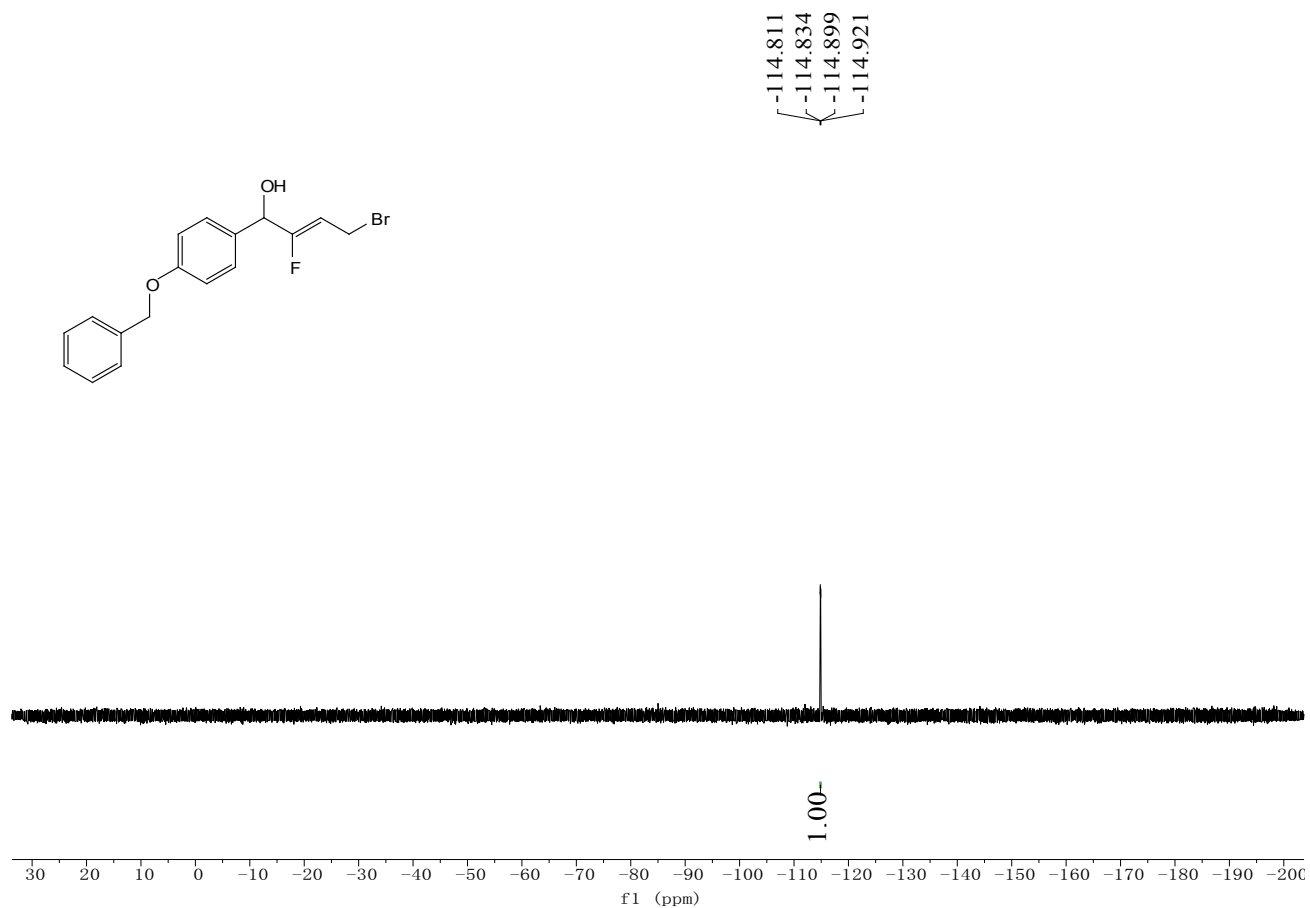

$^1\text{H}$  NMR spectrum of compound **3a**

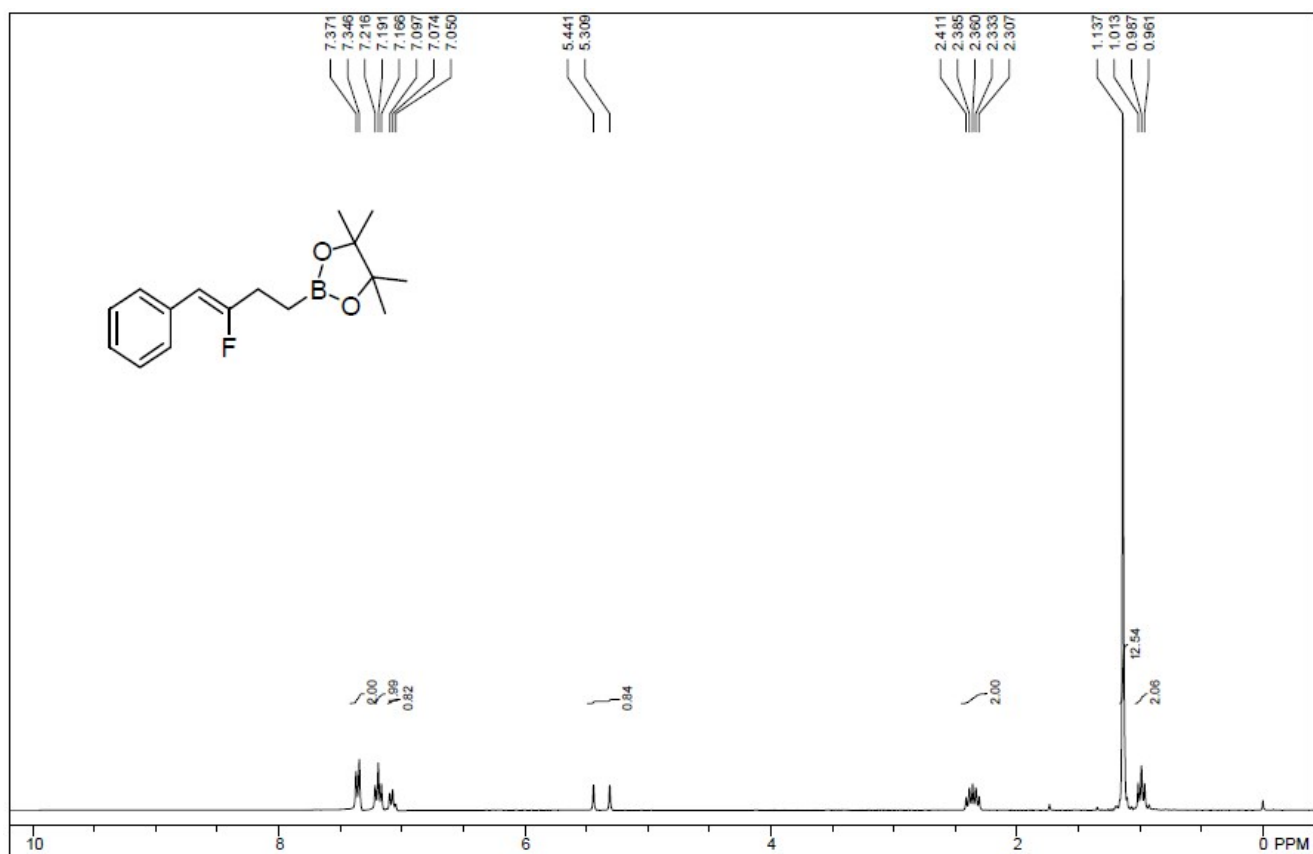

<sup>13</sup>C NMR spectrum of compound **3a**

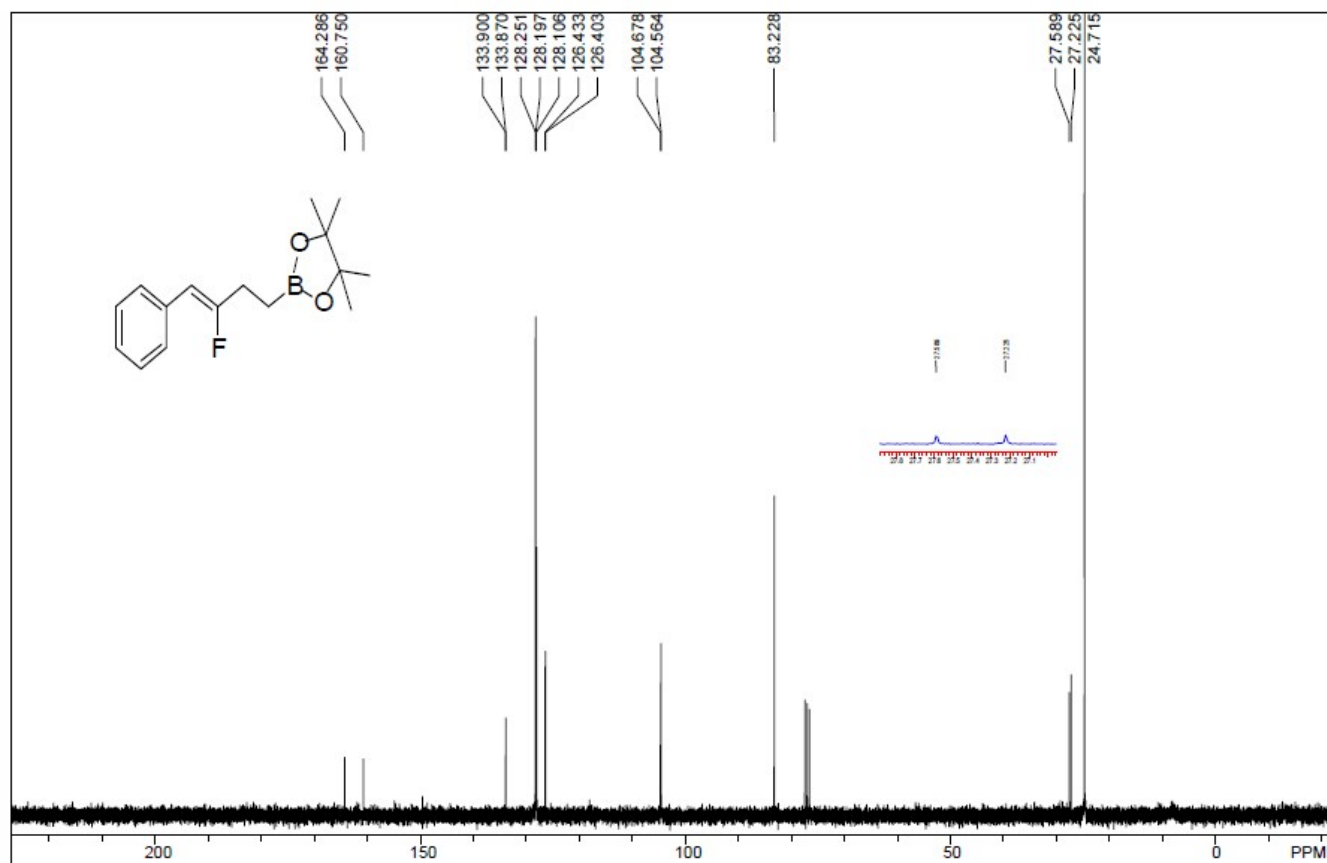

<sup>19</sup>F NMR spectrum of compound **3a**

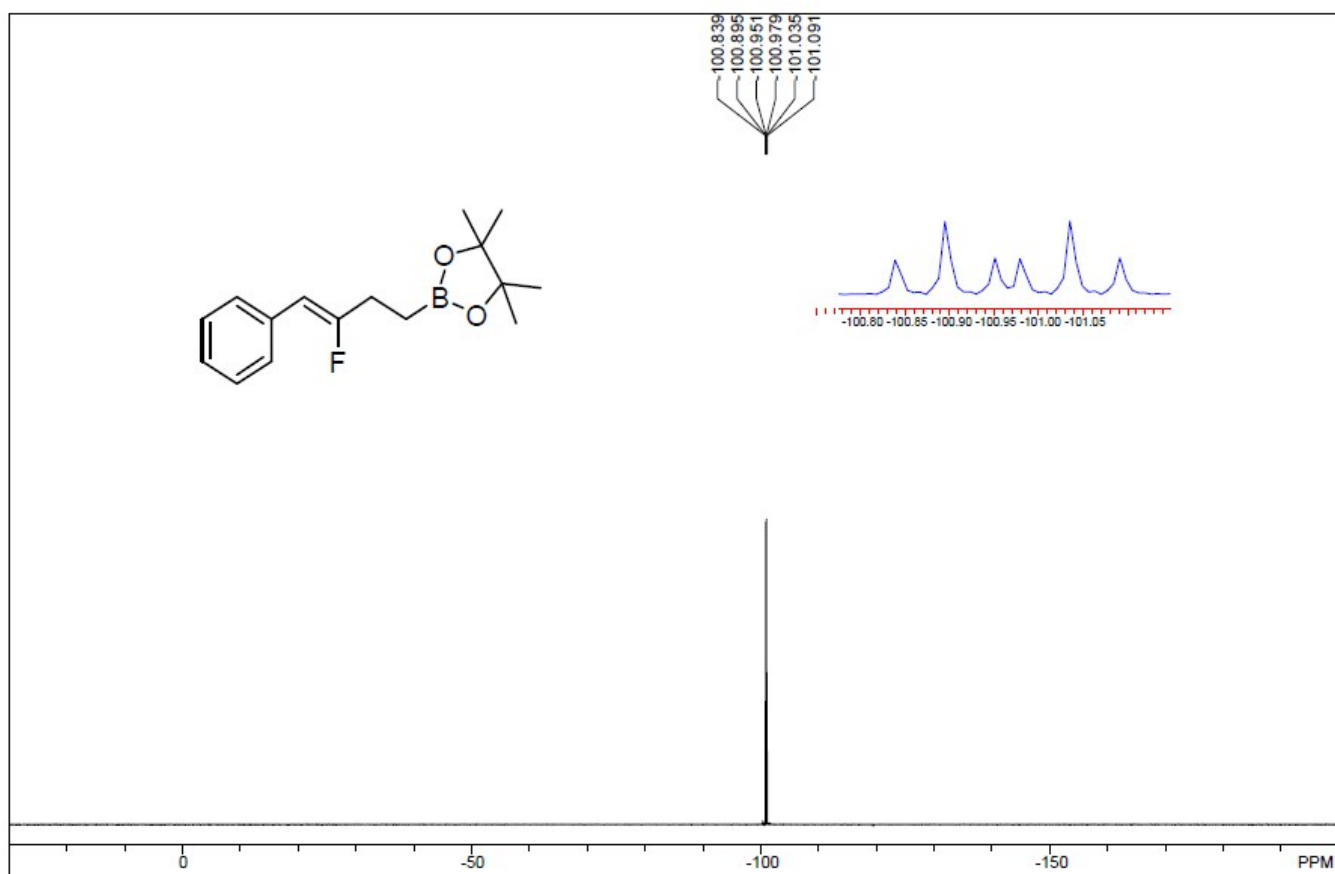



<sup>1</sup>H NMR spectrum of compound **3b**

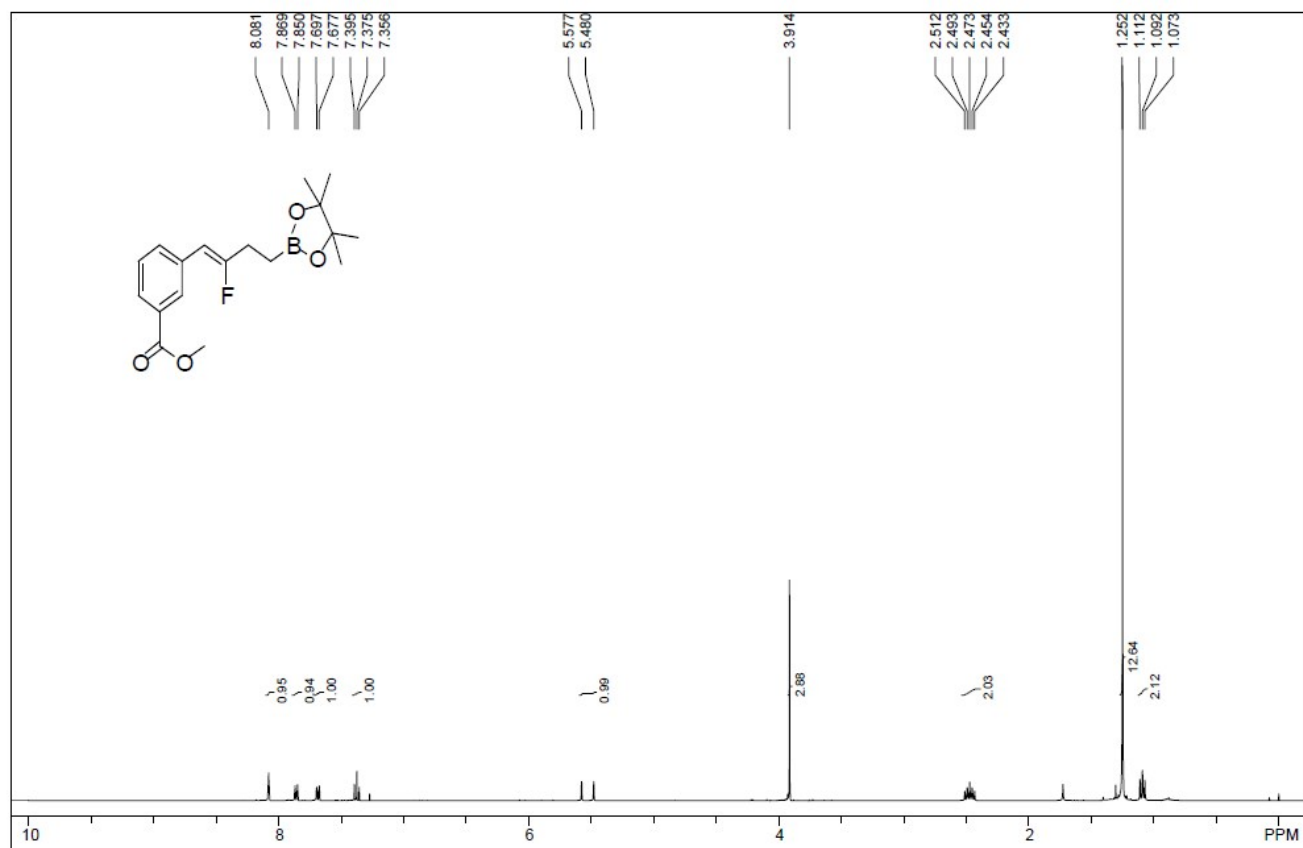

<sup>13</sup>C NMR spectrum of compound **3b**

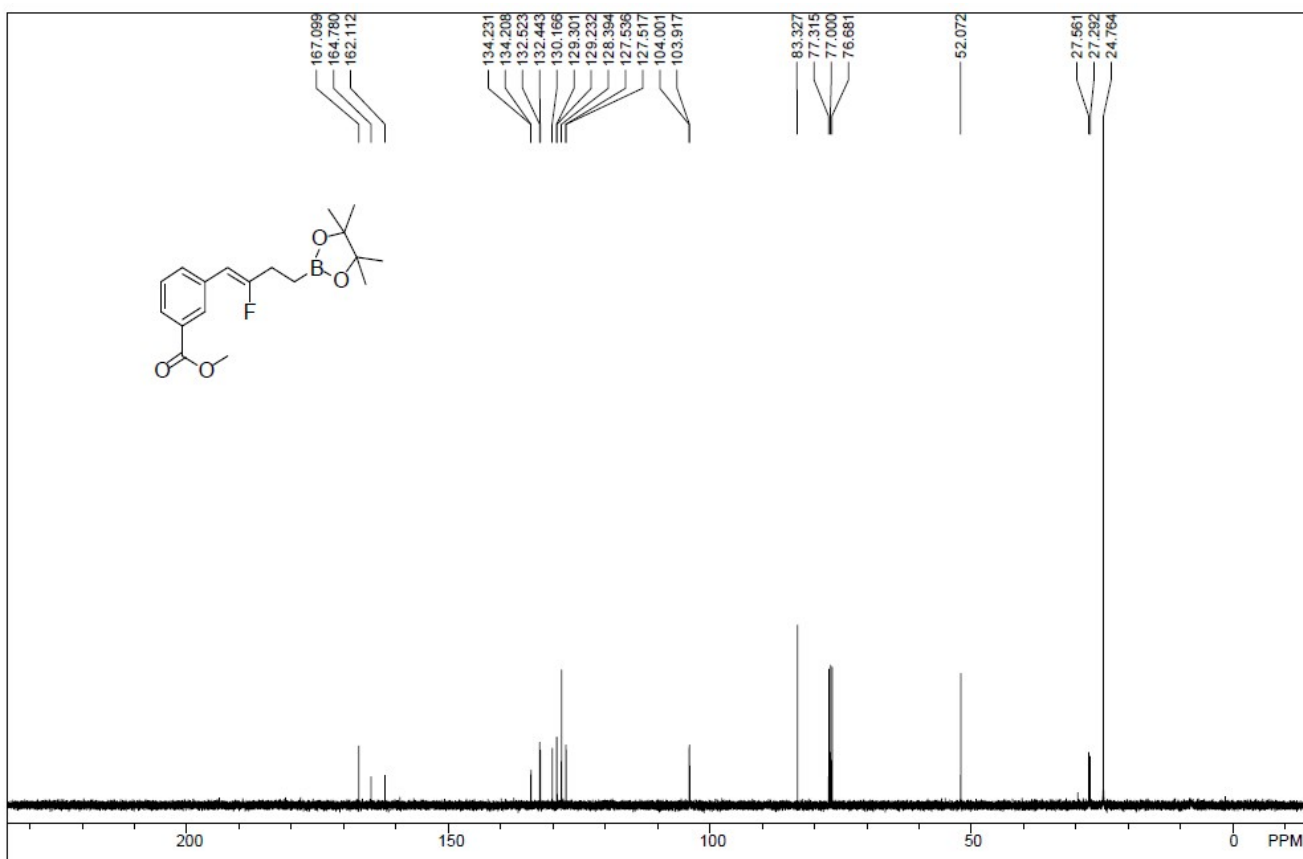

$^{19}\text{F}$  NMR spectrum of compound **3b**

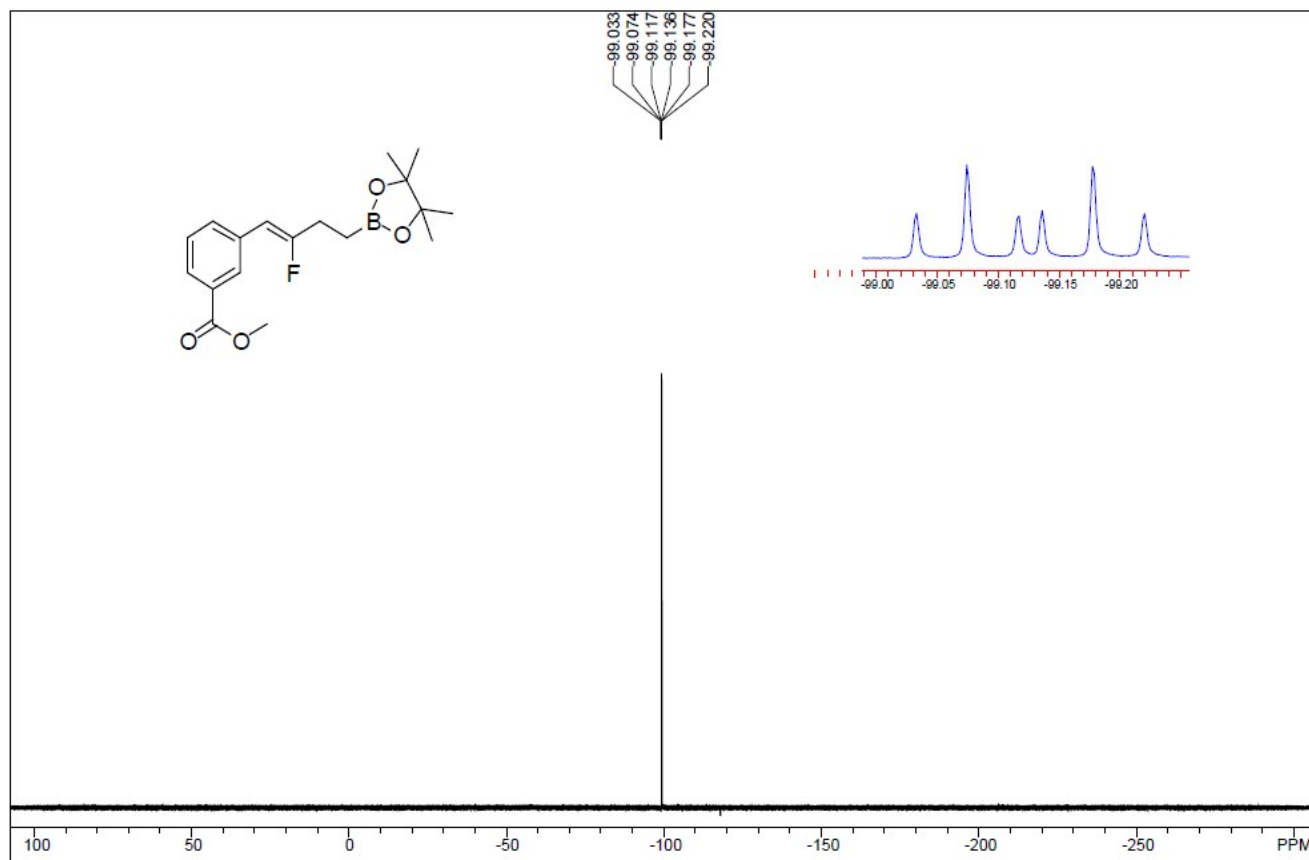

$^1\text{H}$  NMR spectrum of compound **3c**

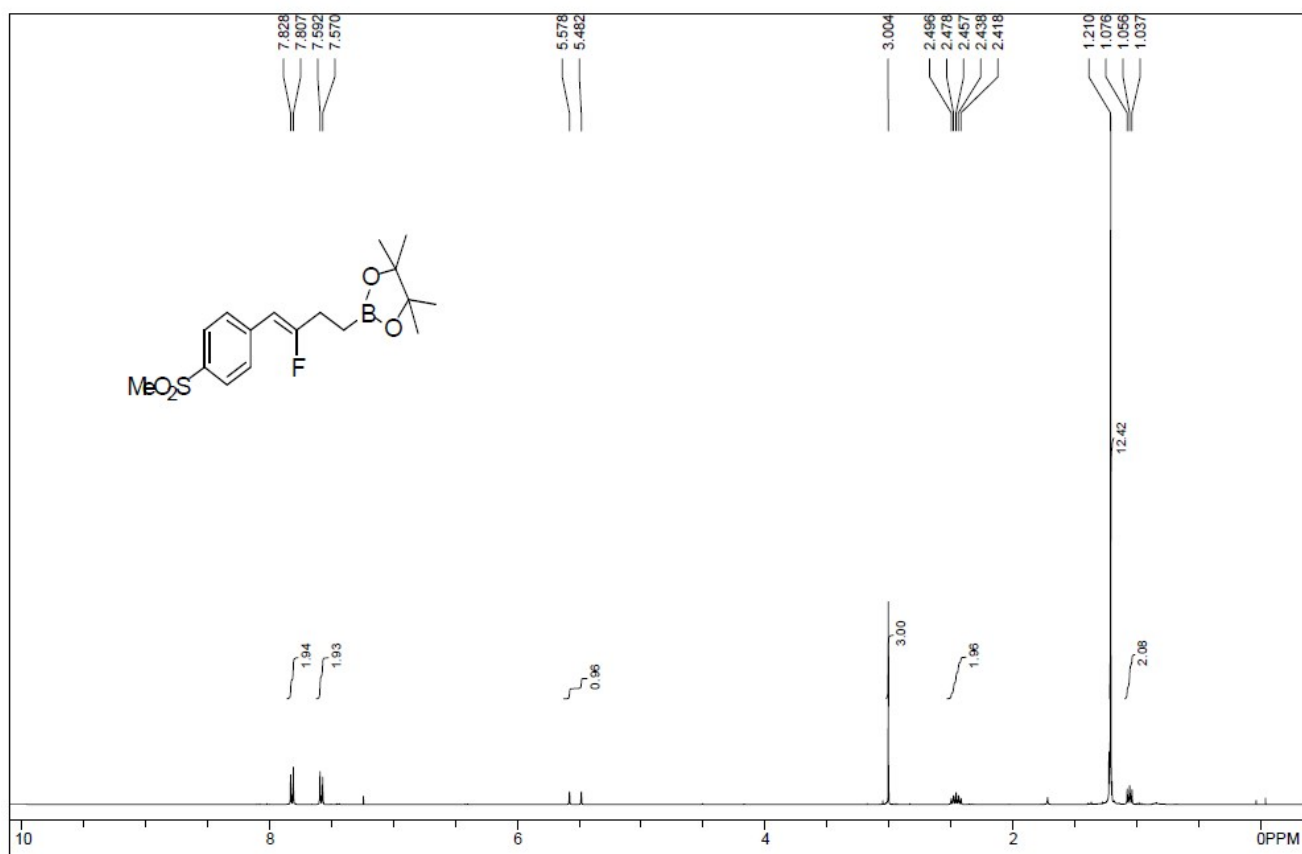

<sup>13</sup>C NMR spectrum of compound **3c**

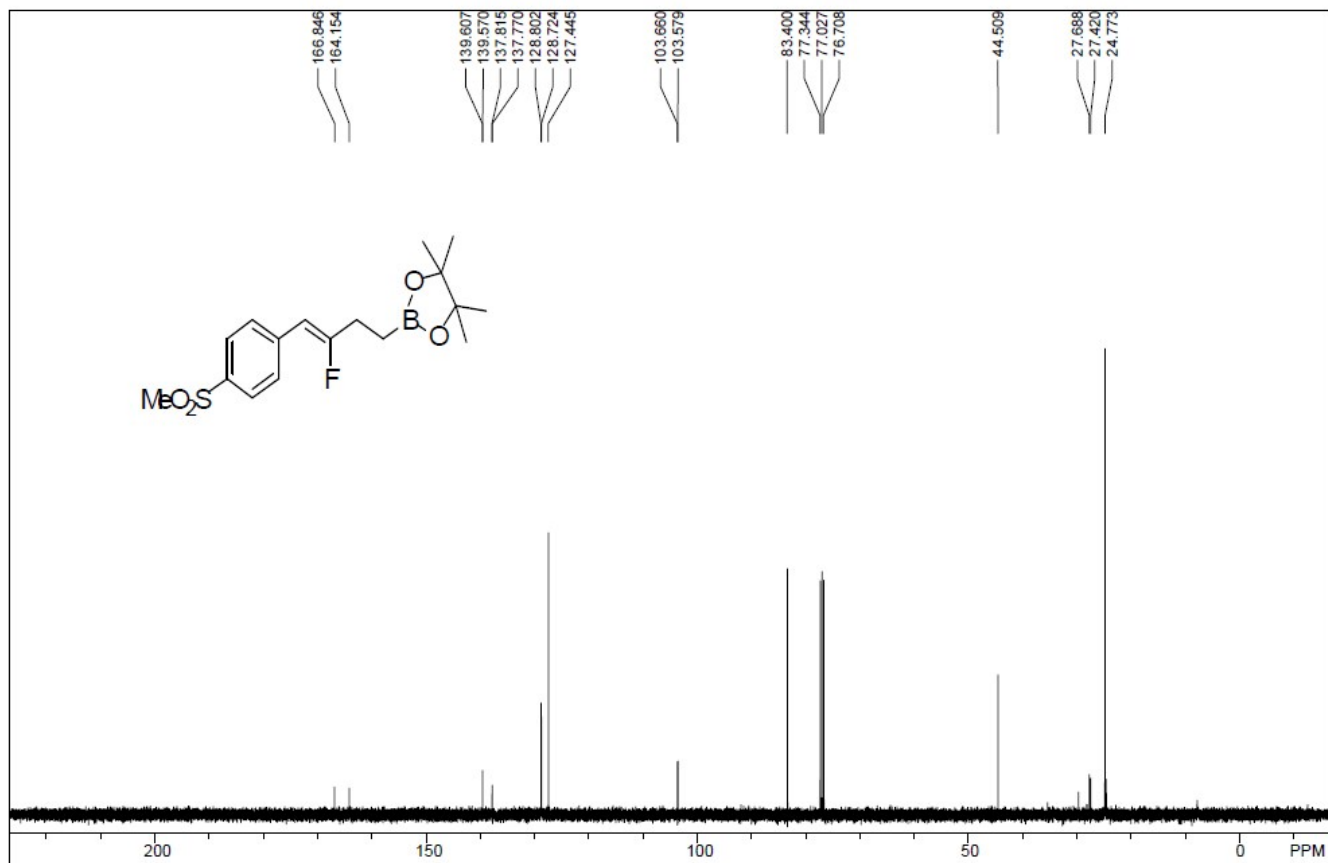

<sup>19</sup>F NMR spectrum of compound **3c**

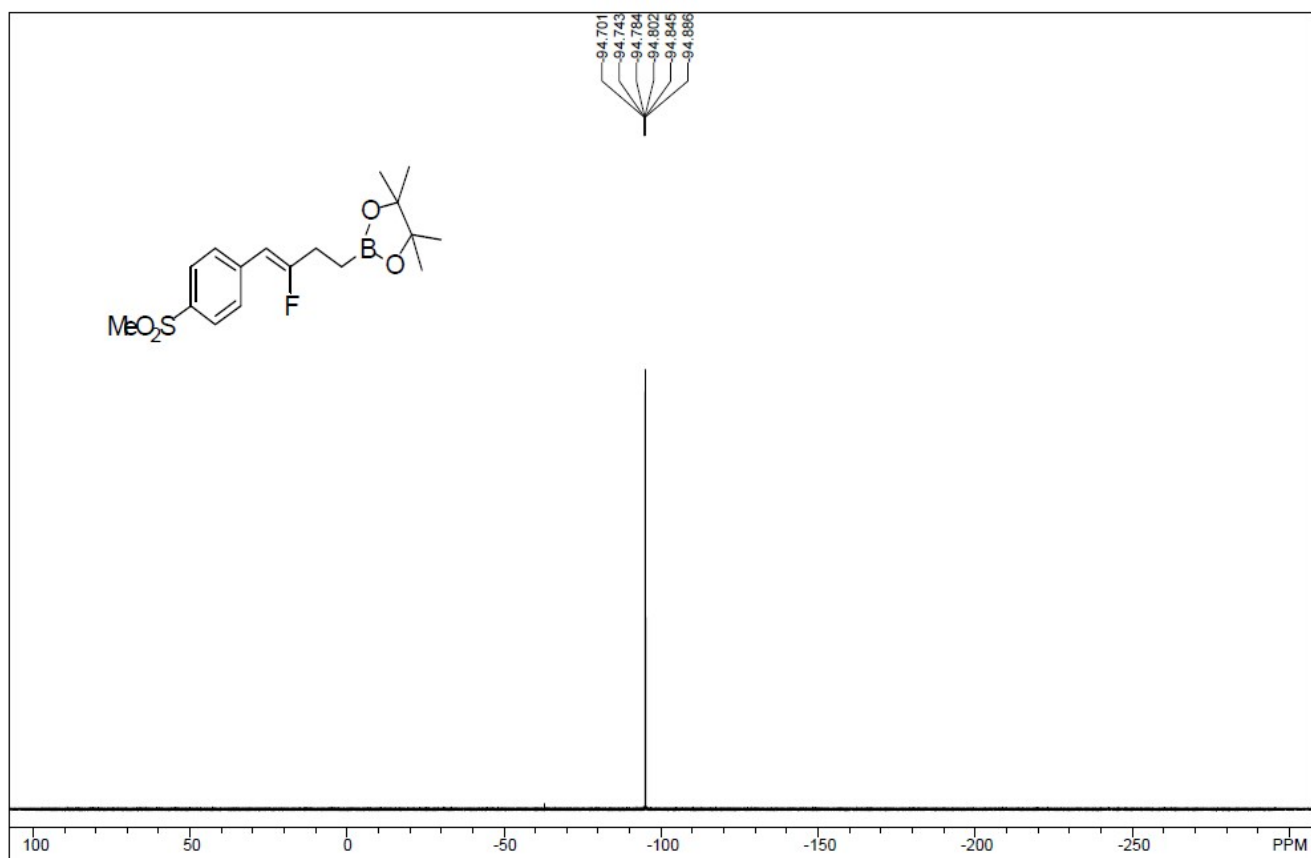

$^1\text{H}$  NMR spectrum of compound **3d**

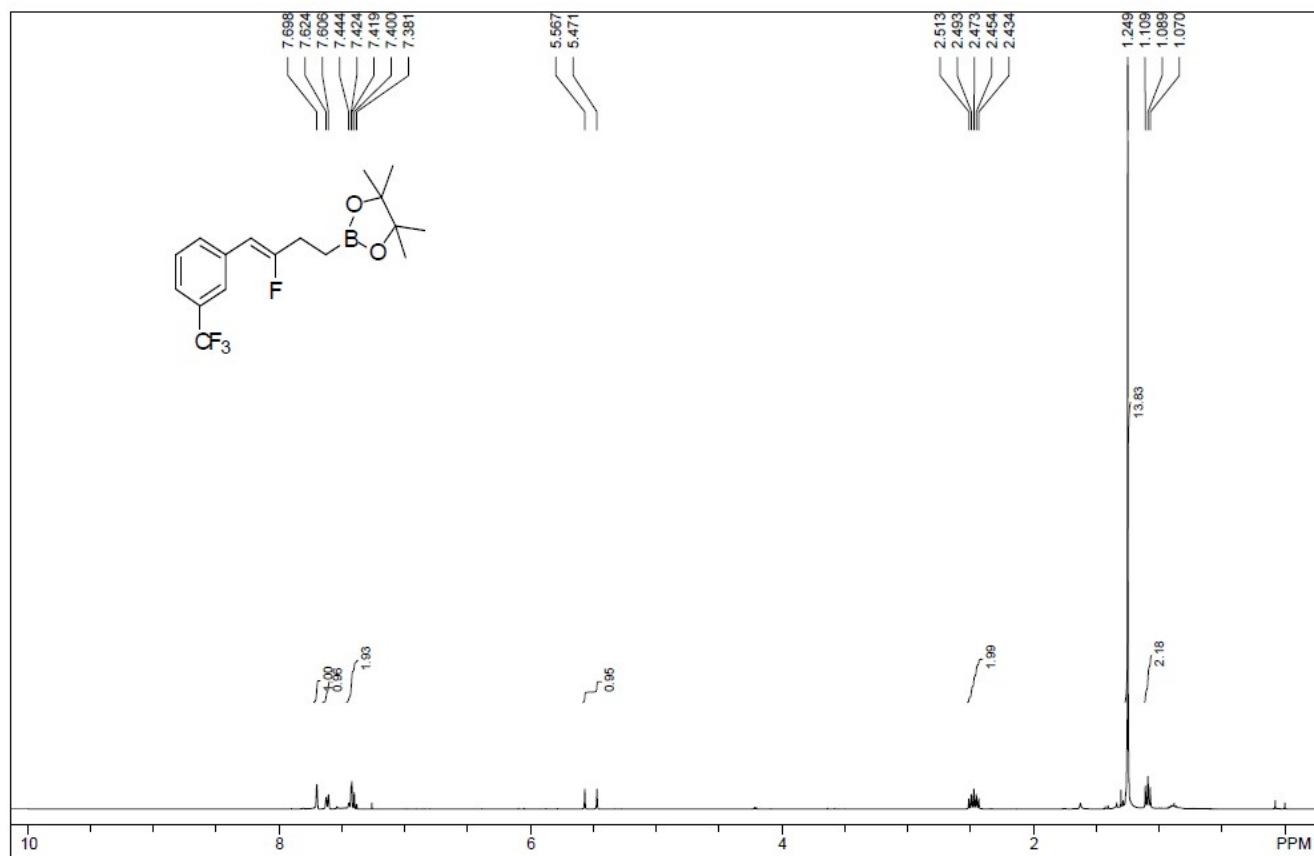

$^{13}\text{C}$  NMR spectrum of compound **3d**

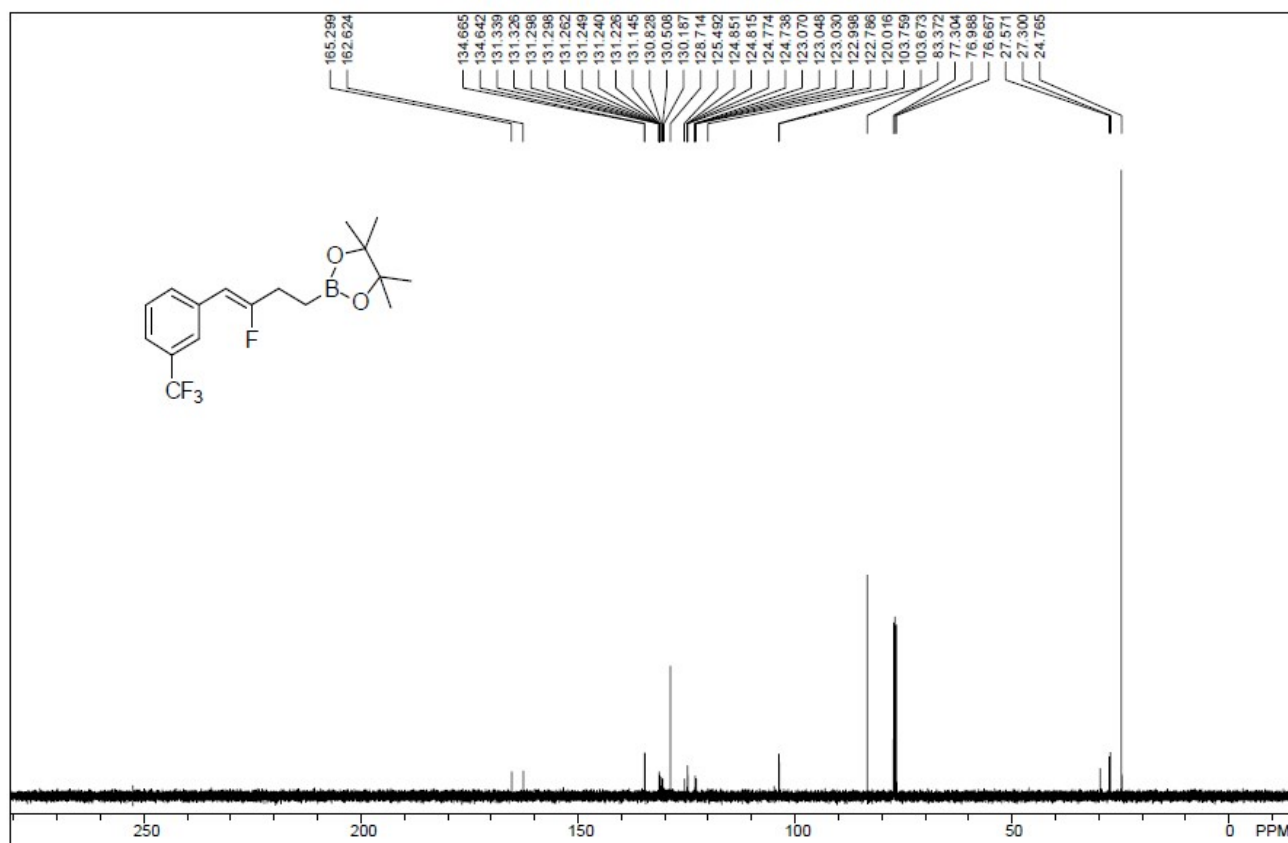

$^{19}\text{F}$  NMR spectrum of compound **3d**

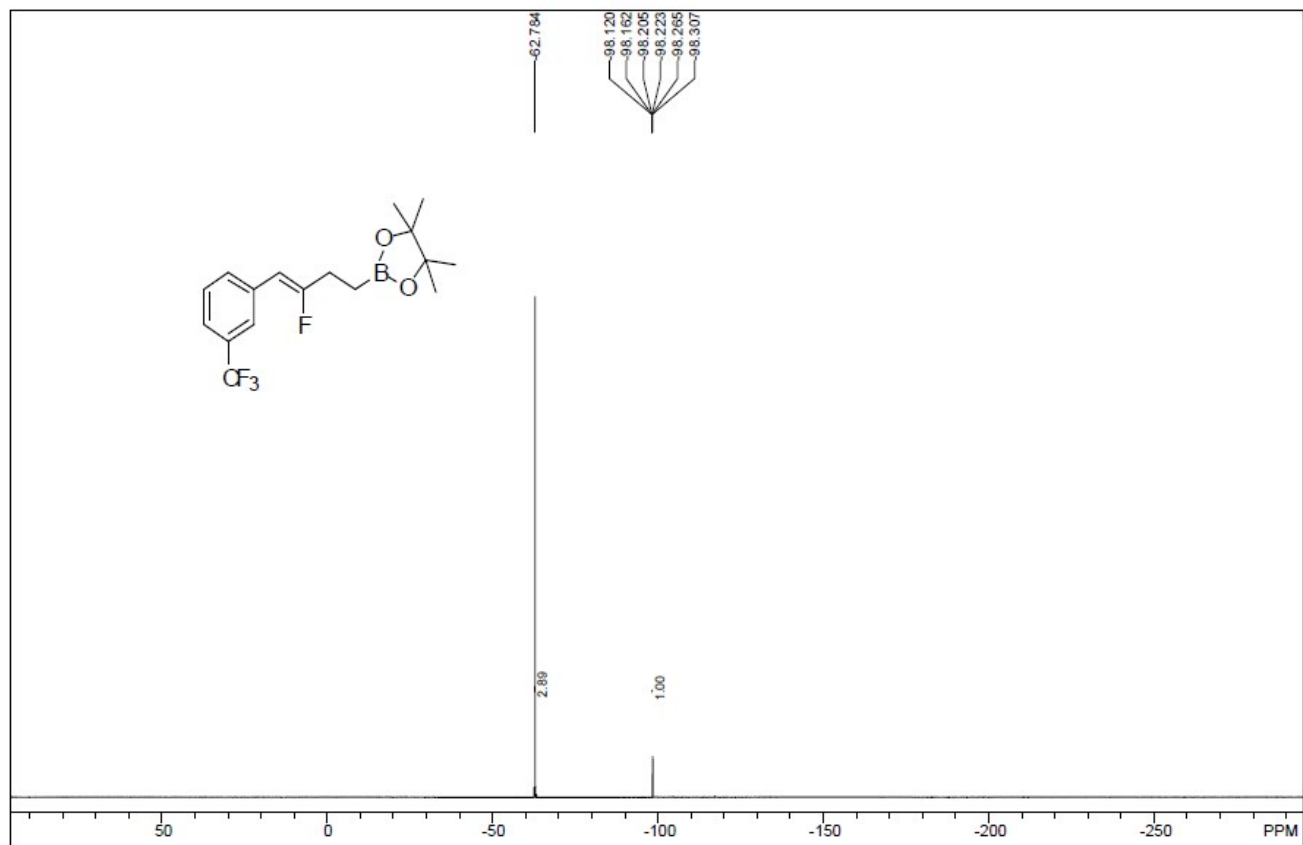

$^1\text{H}$  NMR spectrum of compound **3e**

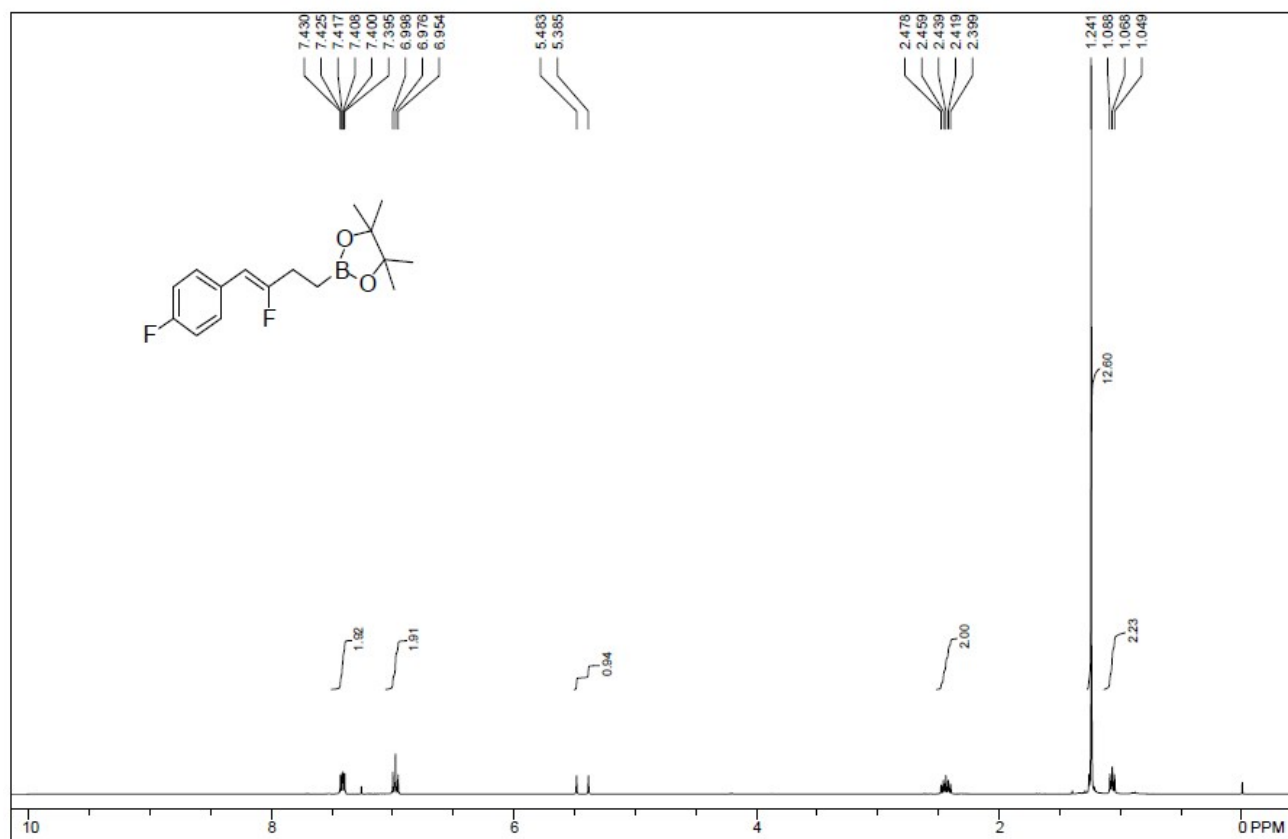

<sup>13</sup>C NMR spectrum of compound **3e**

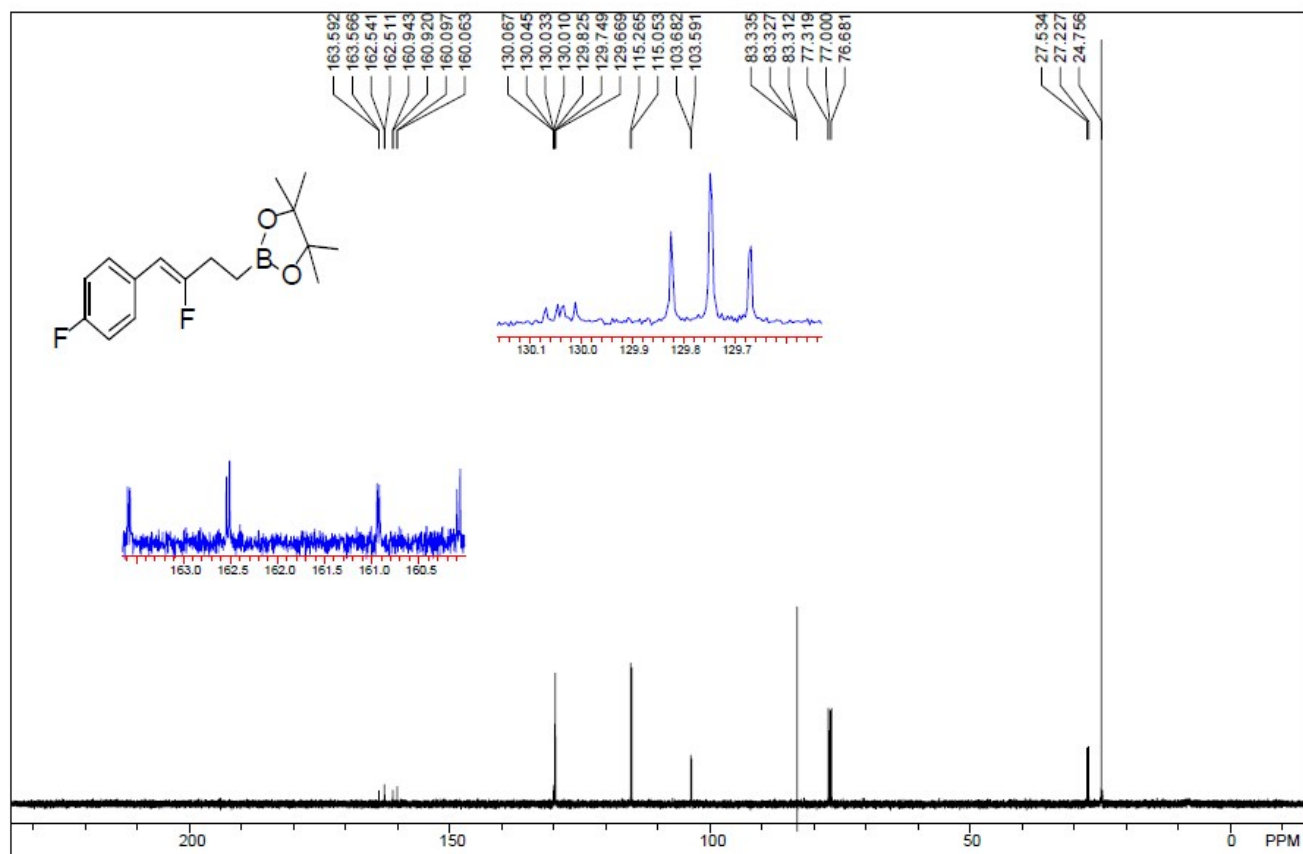

<sup>19</sup>F NMR spectrum of compound **3e**

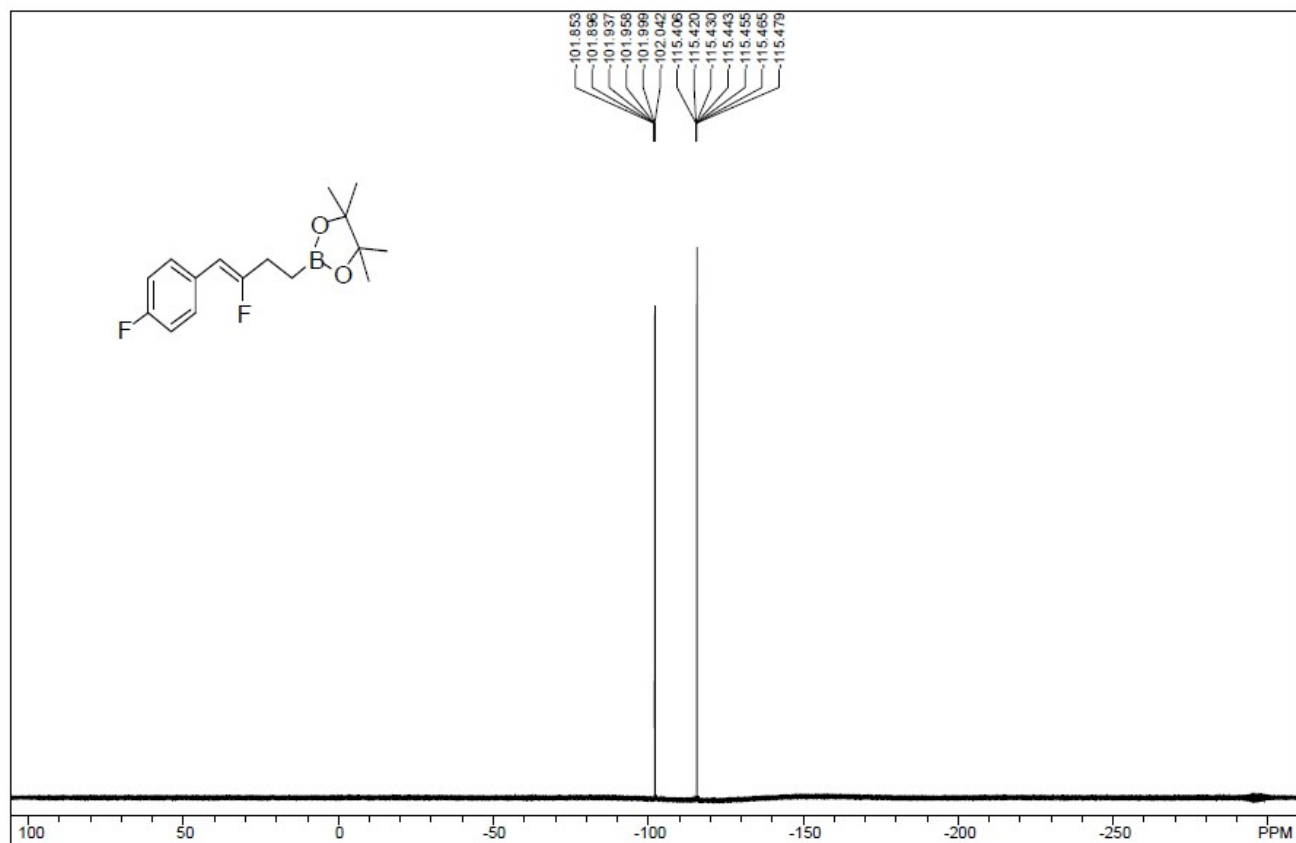

$^1\text{H}$  NMR spectrum of compound **3f**

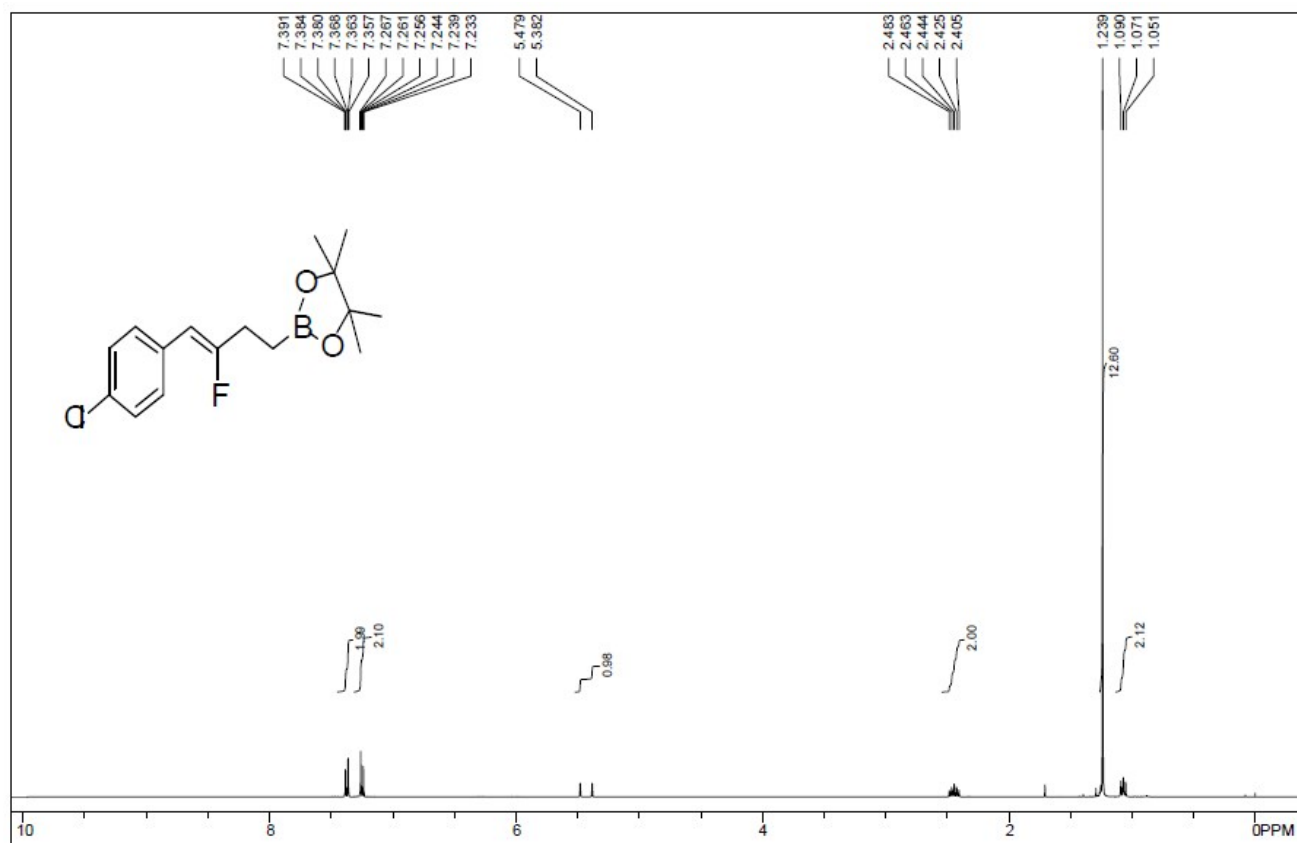

$^{13}\text{C}$  NMR spectrum of compound **3f**

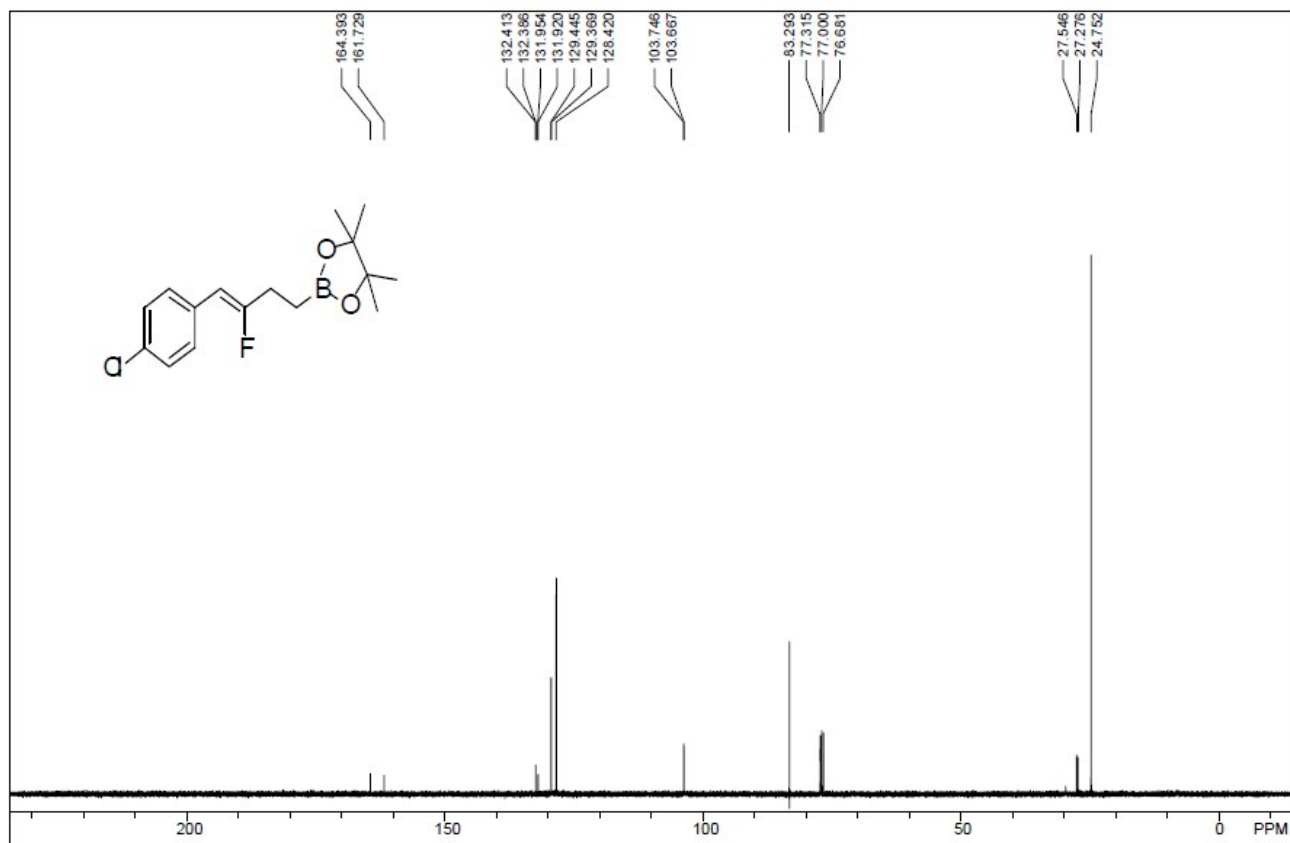

$^{19}\text{F}$  NMR spectrum of compound **3f**

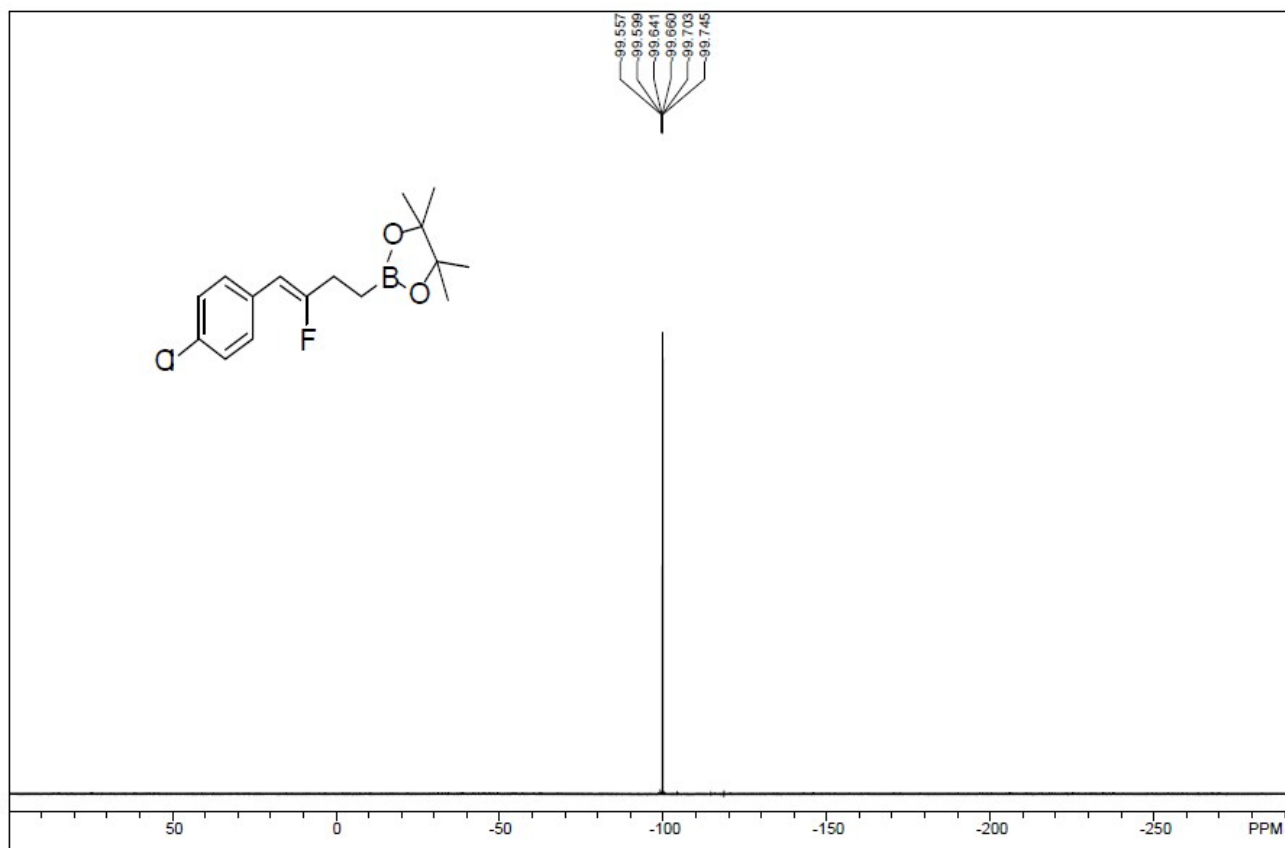

$^1\text{H}$  NMR spectrum of compound **3g**

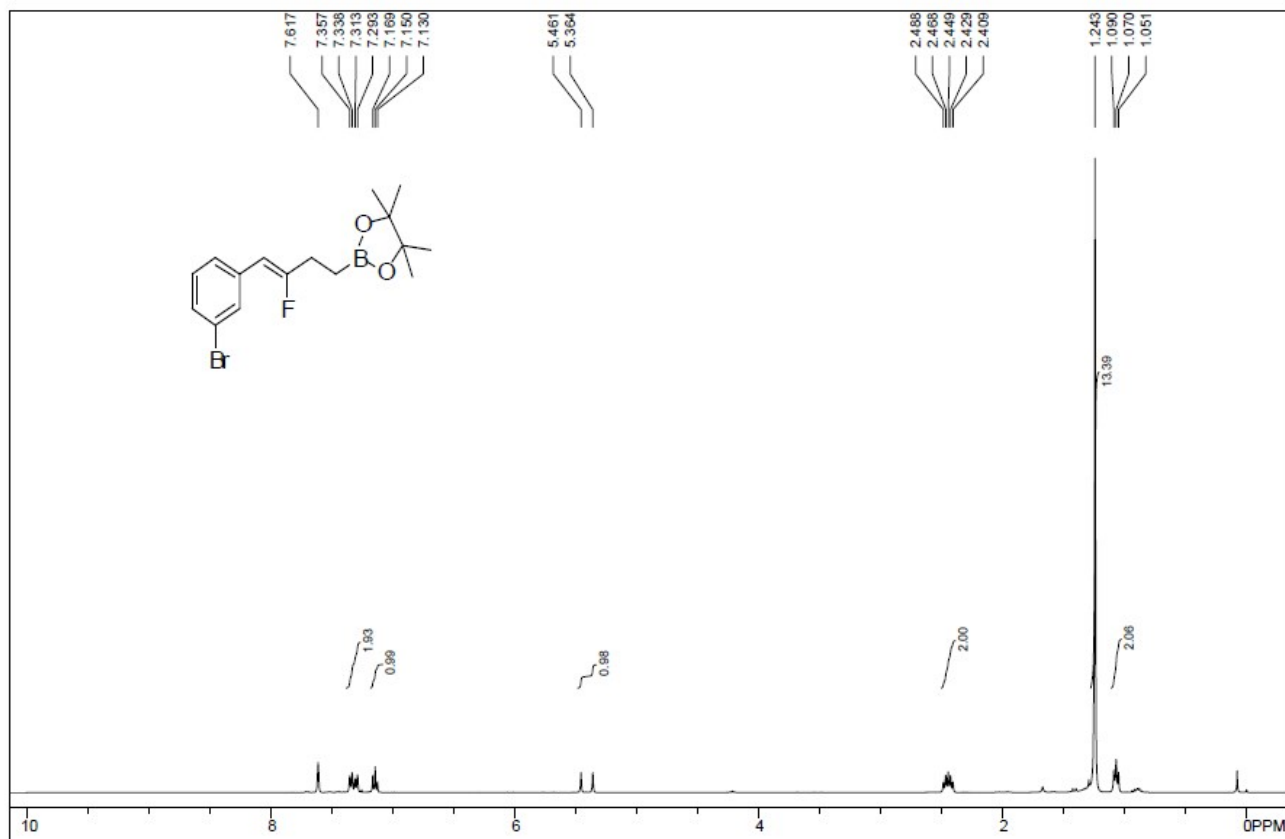



<sup>13</sup>C NMR spectrum of compound **3g**

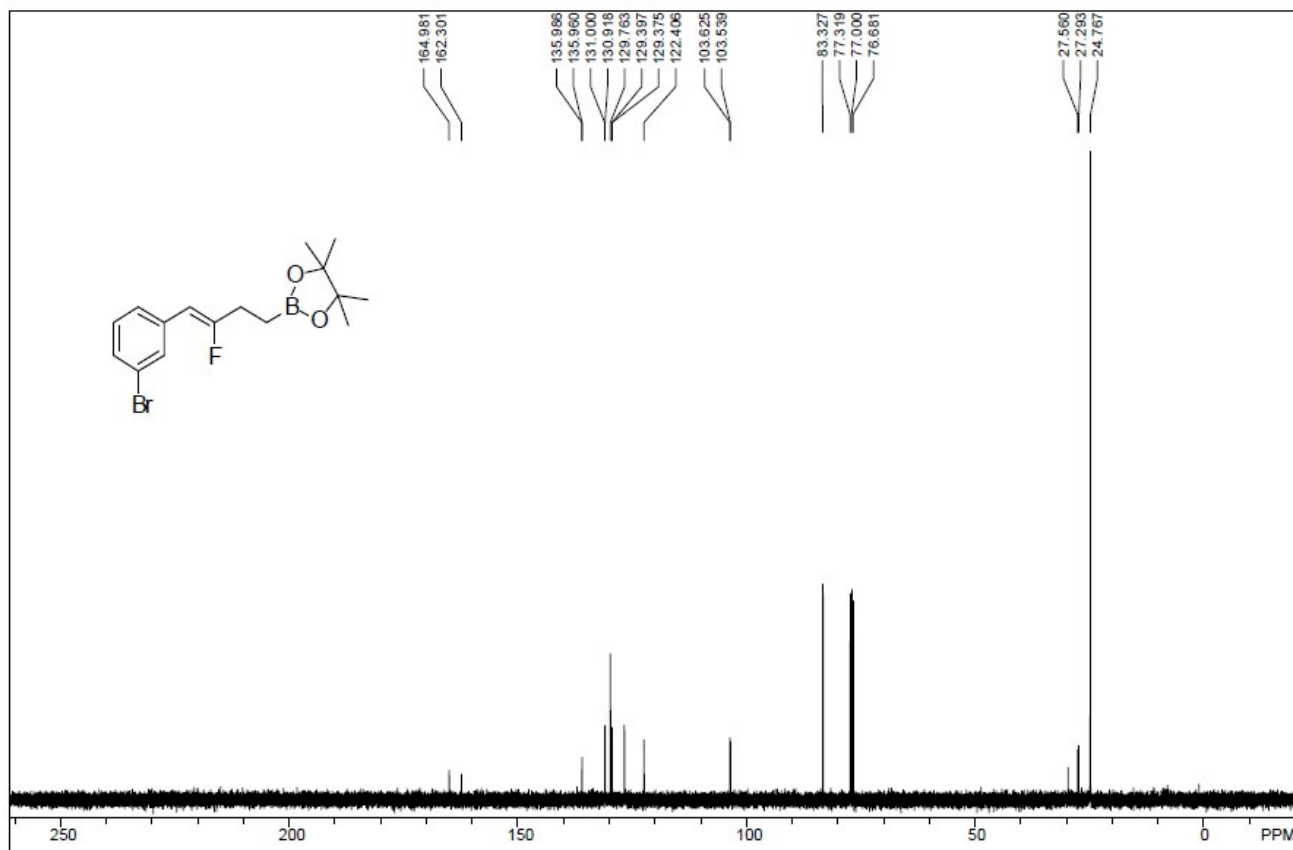

<sup>19</sup>F NMR spectrum of compound **3g**

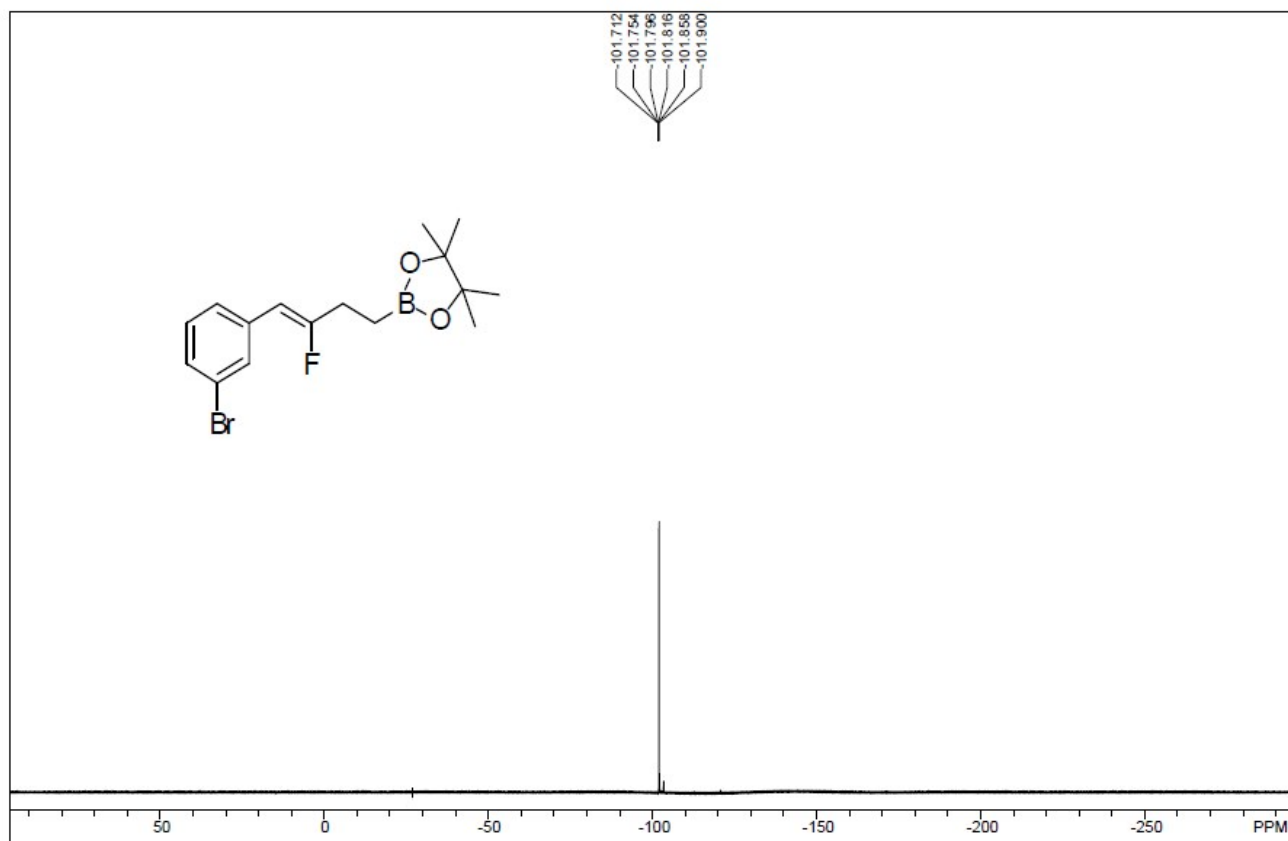

<sup>1</sup>H NMR spectrum of compound **3h**

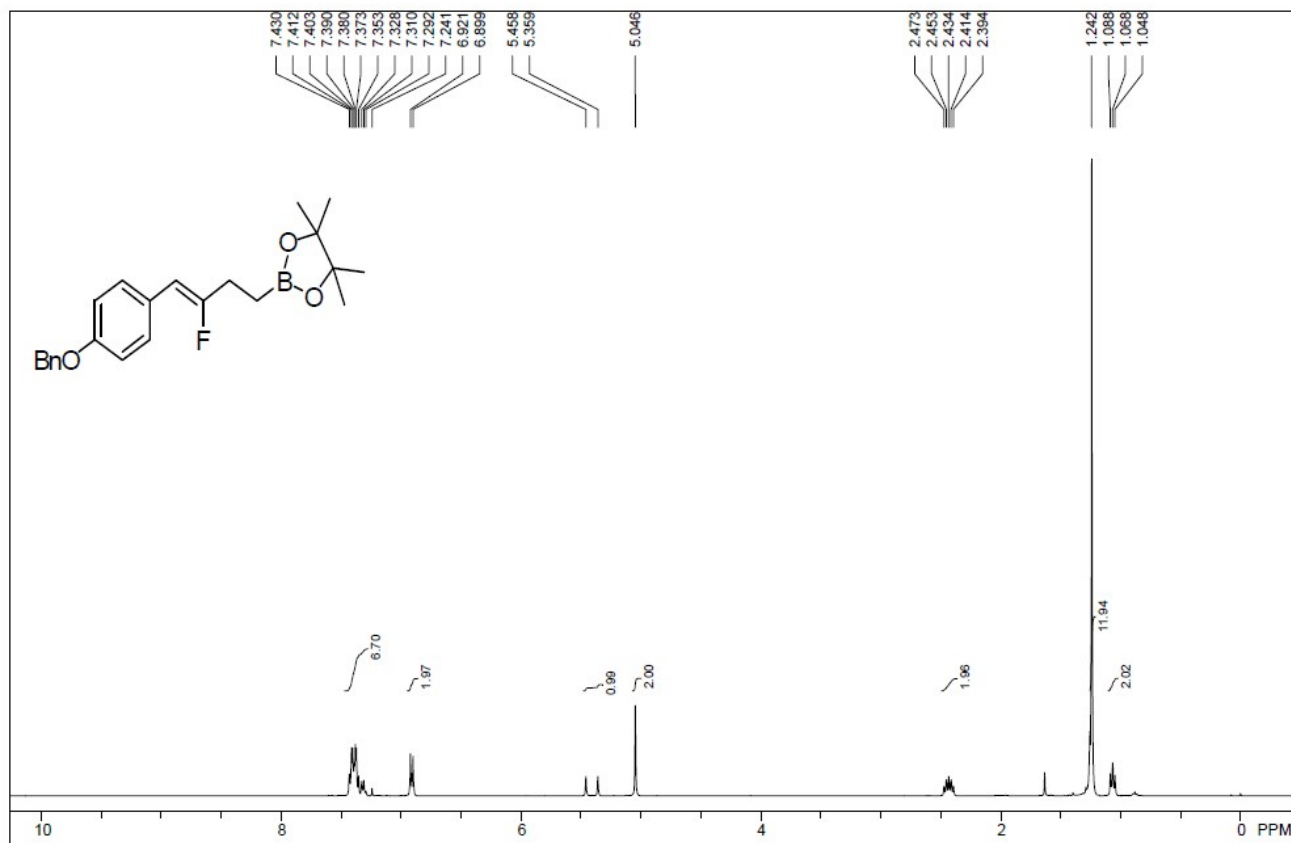

<sup>13</sup>C NMR spectrum of compound **3h**

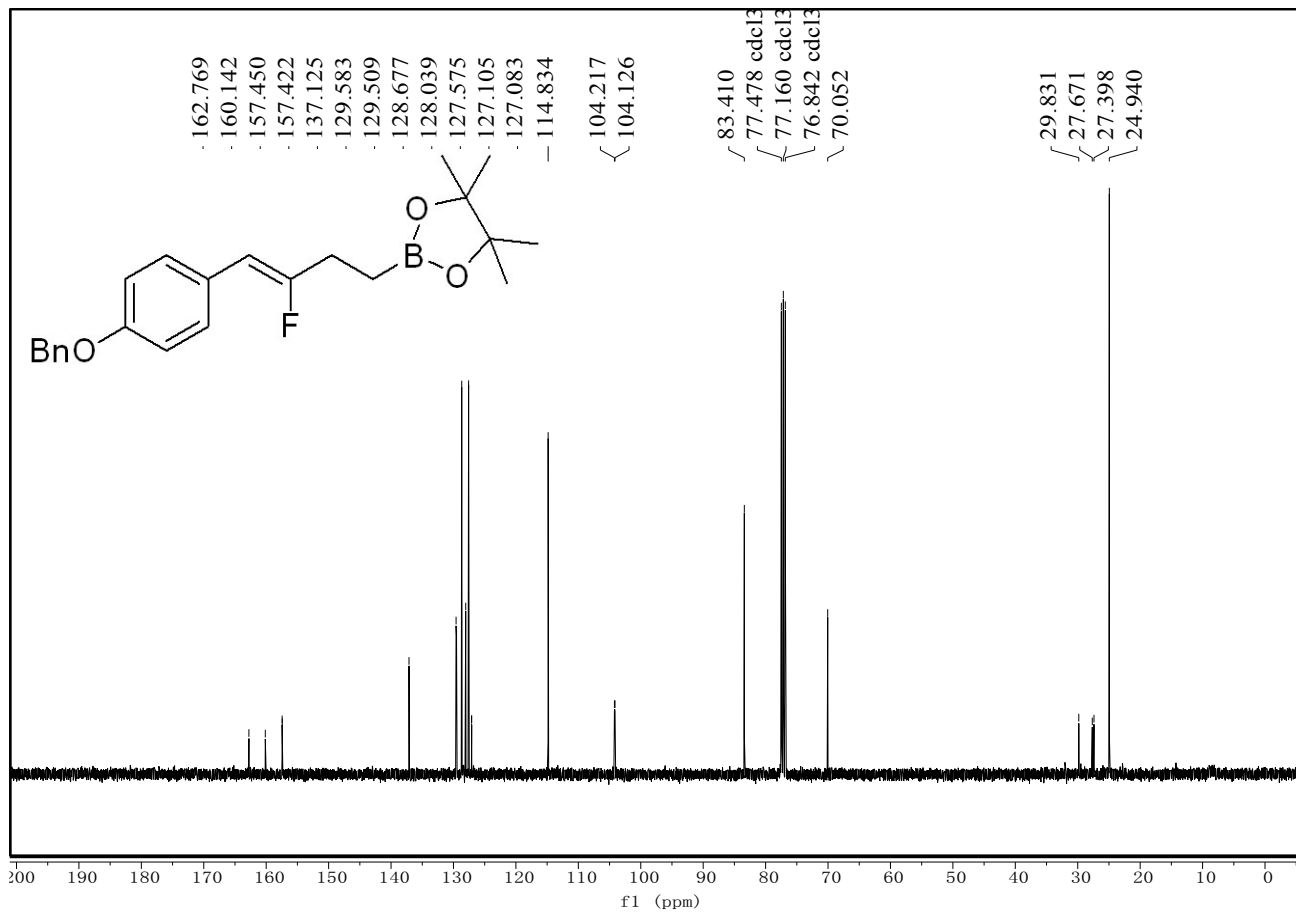

$^{19}\text{F}$  NMR spectrum of compound **3h**

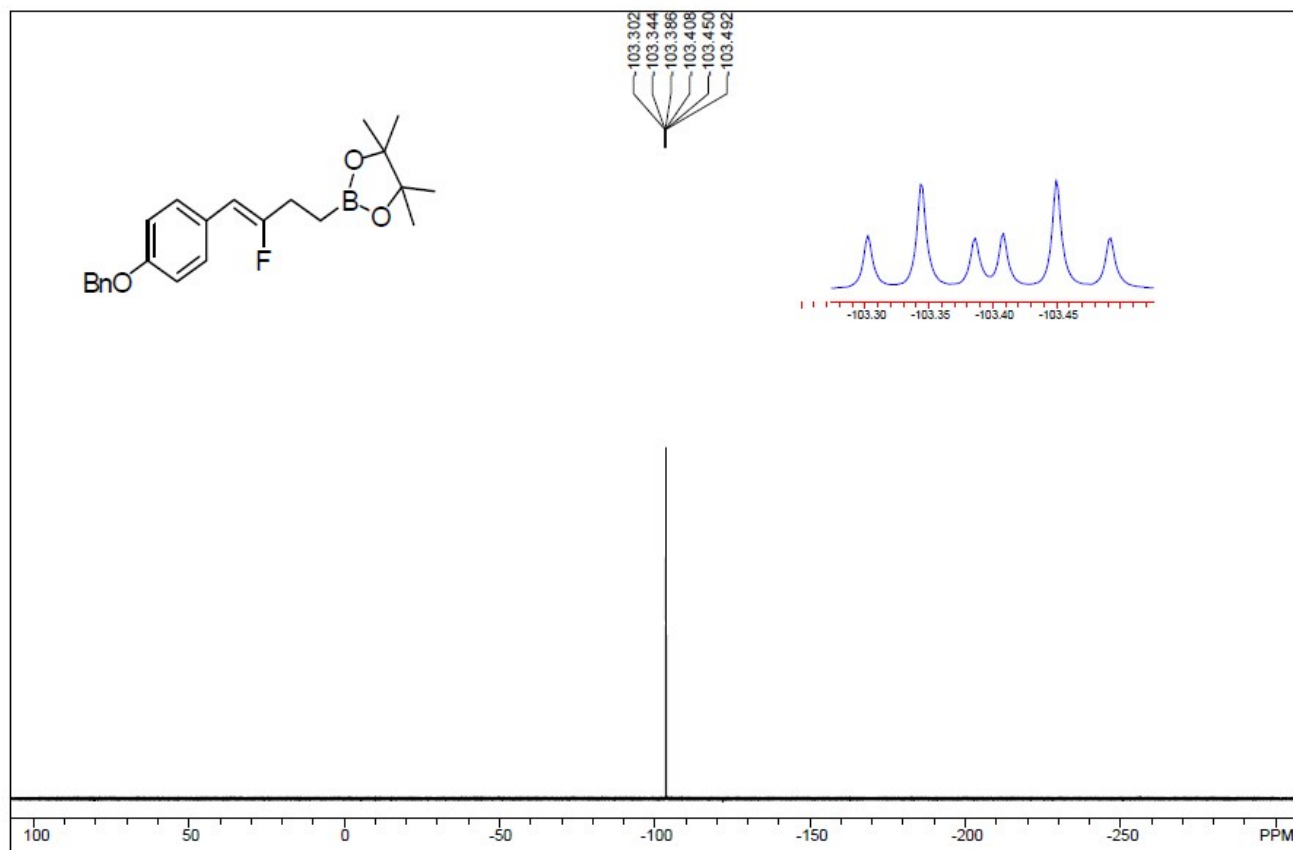

$^1\text{H}$  NMR spectrum of compound **3i**

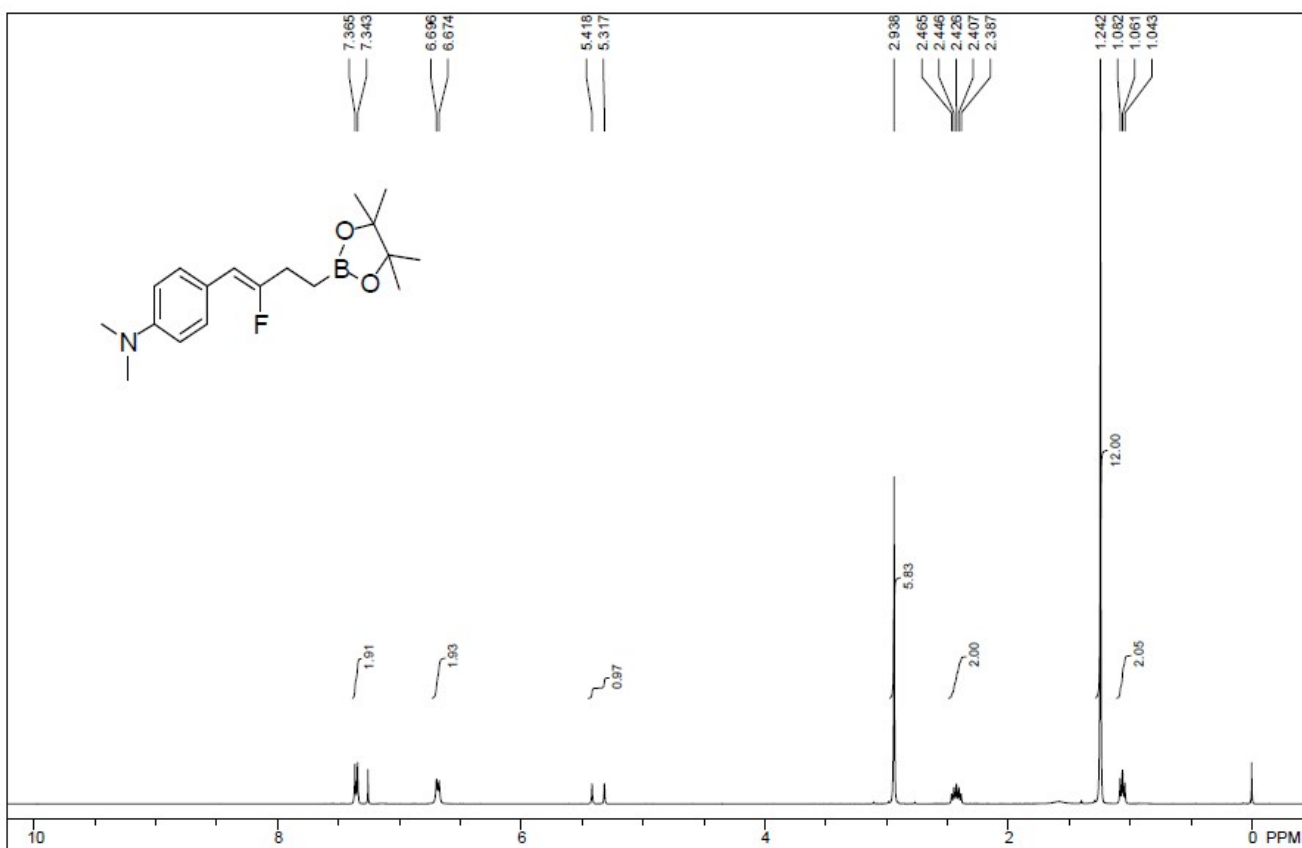

<sup>13</sup>C NMR spectrum of compound **3i**

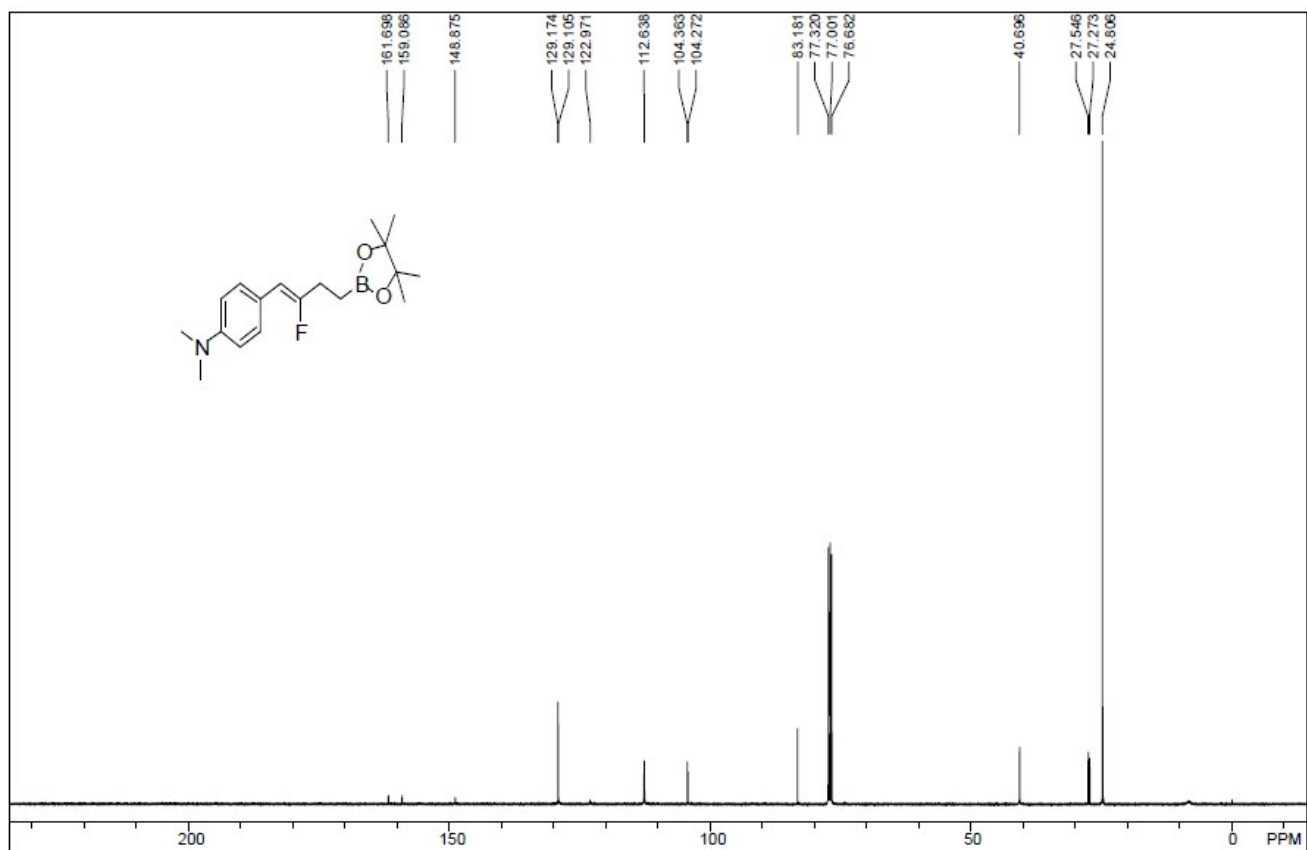

<sup>19</sup>F NMR spectrum of compound **3i**

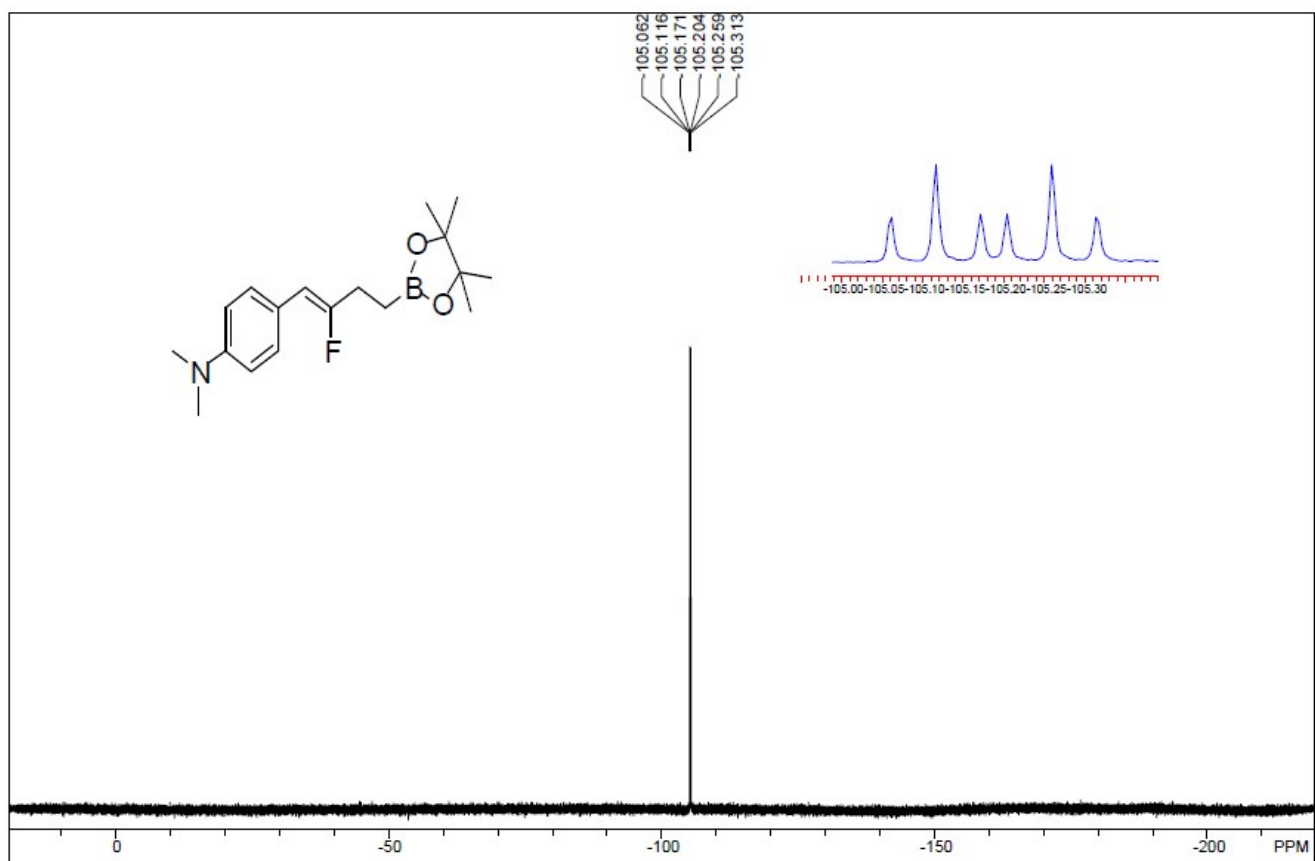

<sup>1</sup>H NMR spectrum of compound **3k**

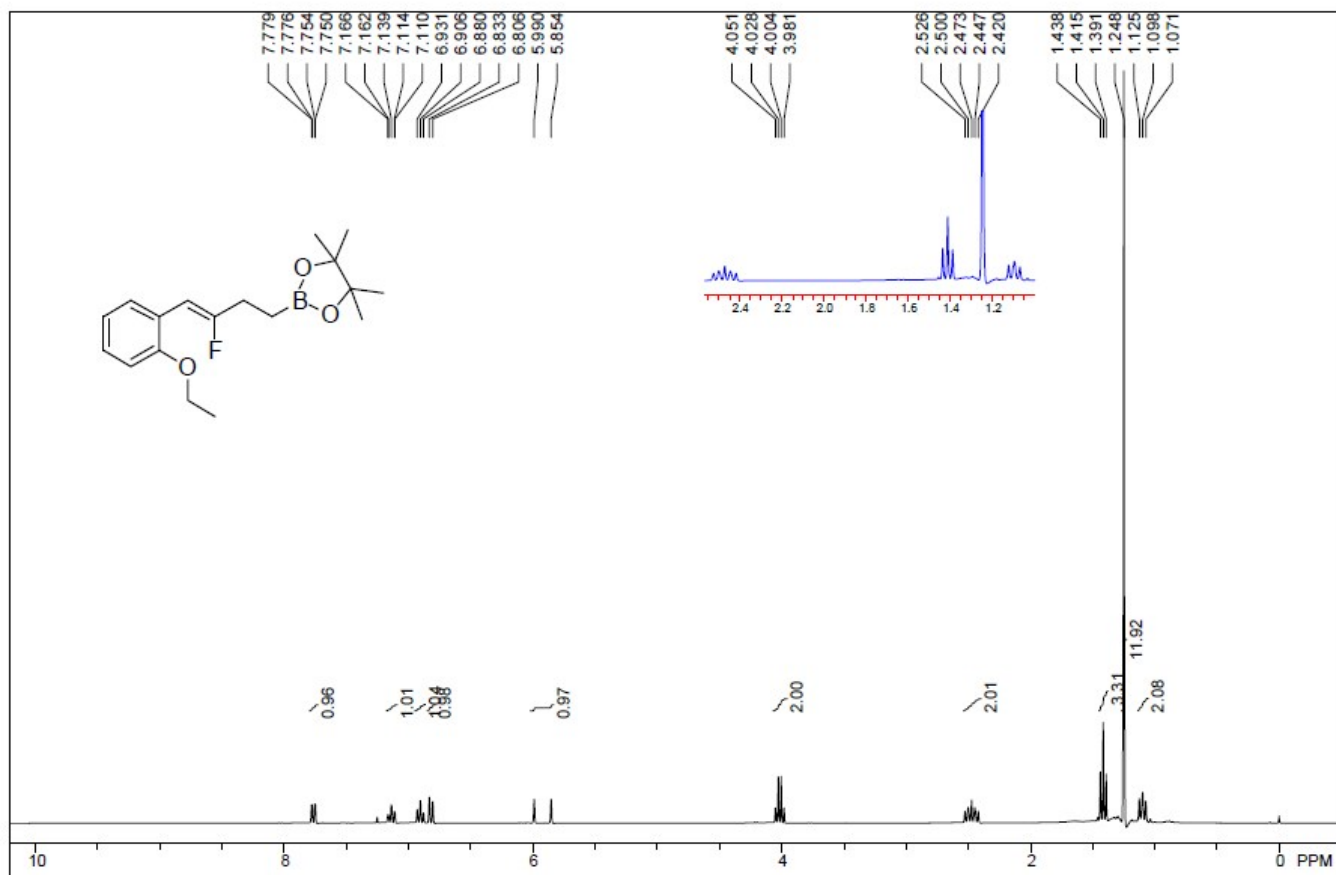

<sup>13</sup>C NMR spectrum of compound **3k**

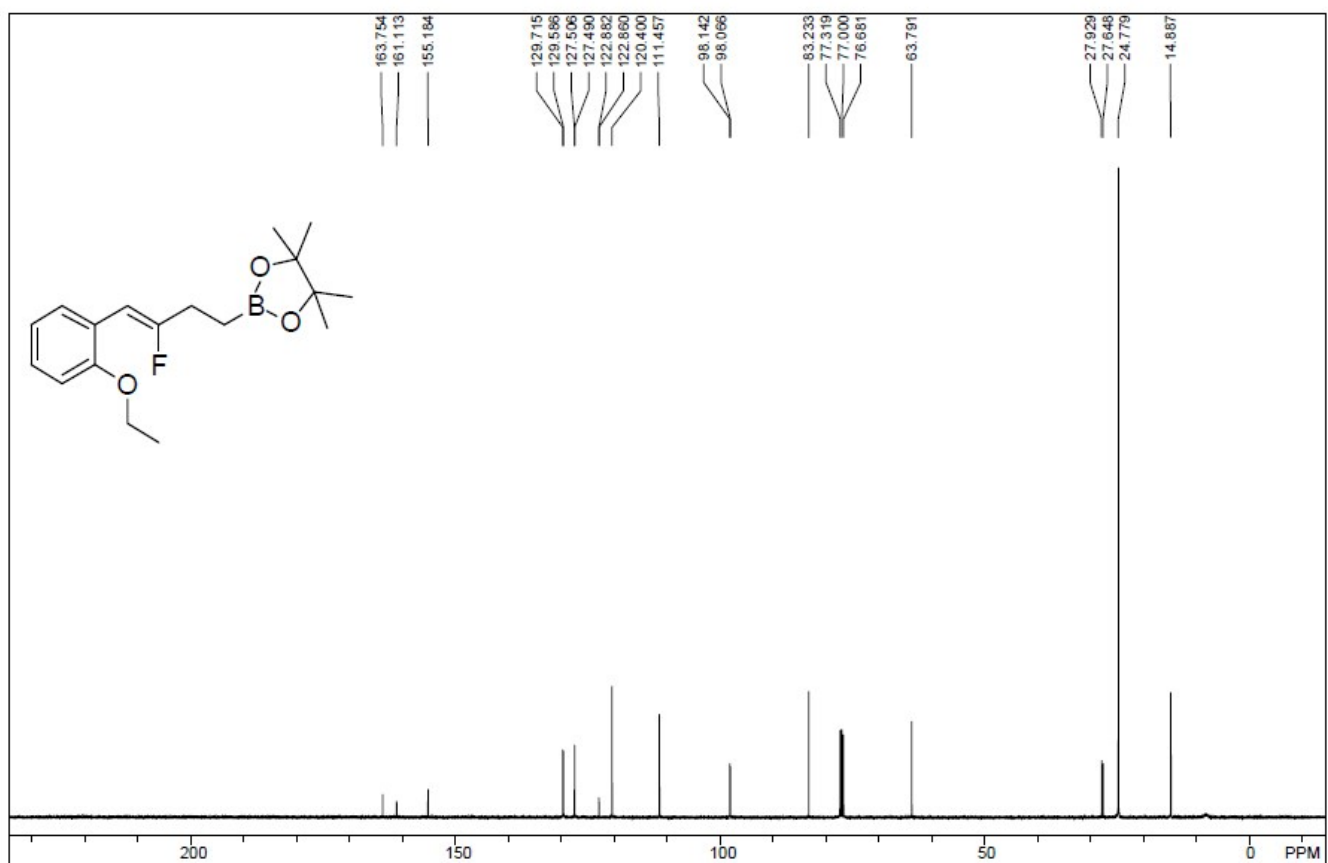

$^{19}\text{F}$  NMR spectrum of compound **3k**

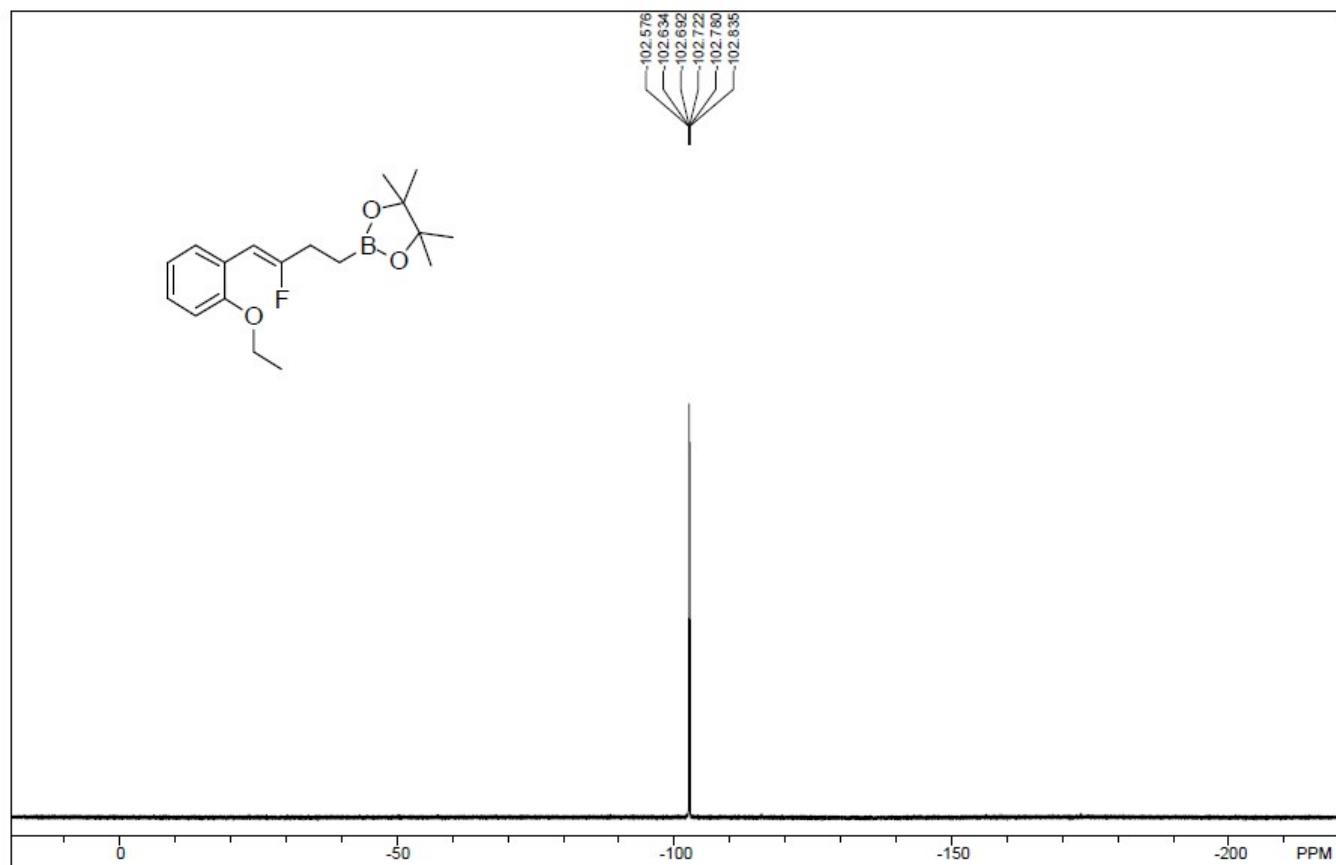

$^1\text{H}$  NMR spectrum of compound **3l**

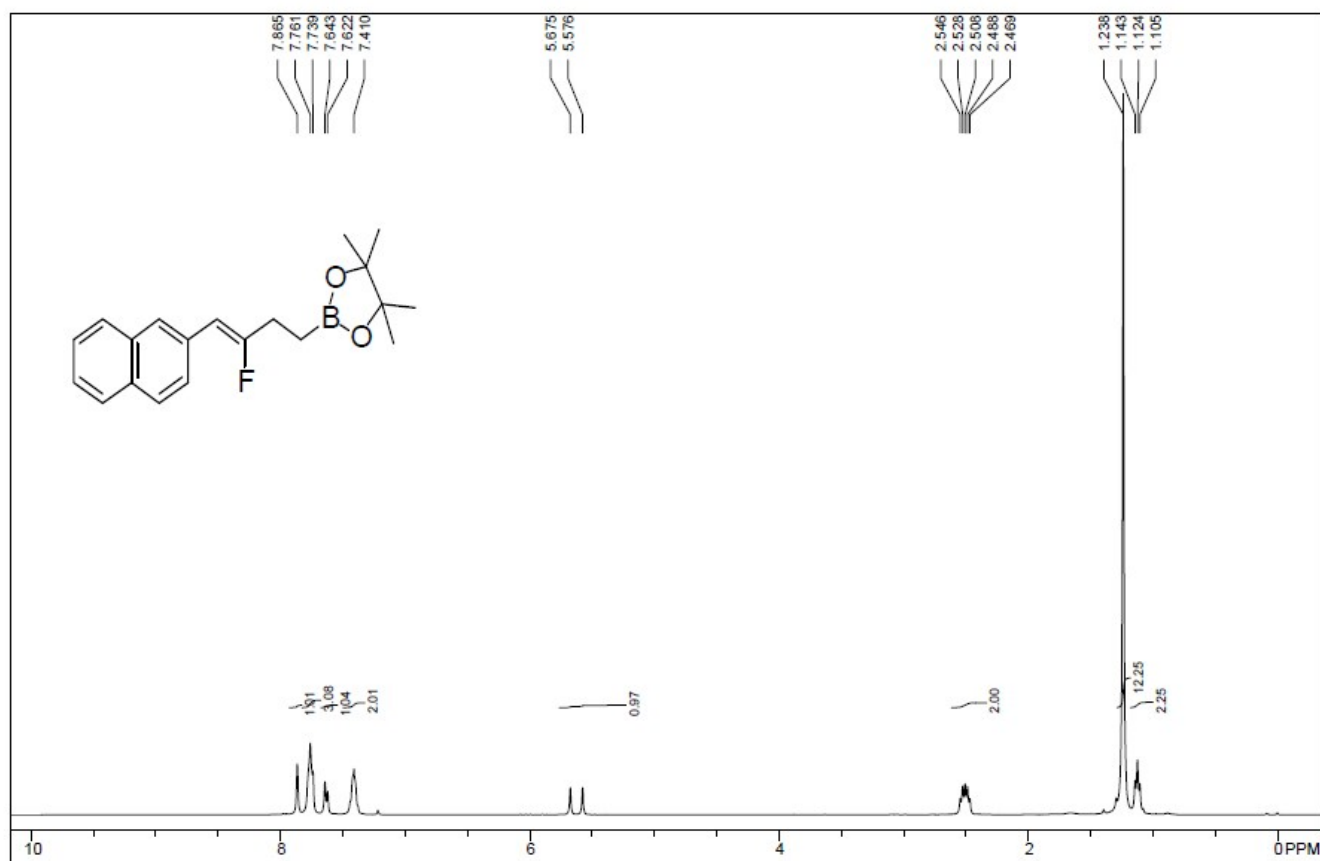

<sup>13</sup>C NMR spectrum of compound **31**

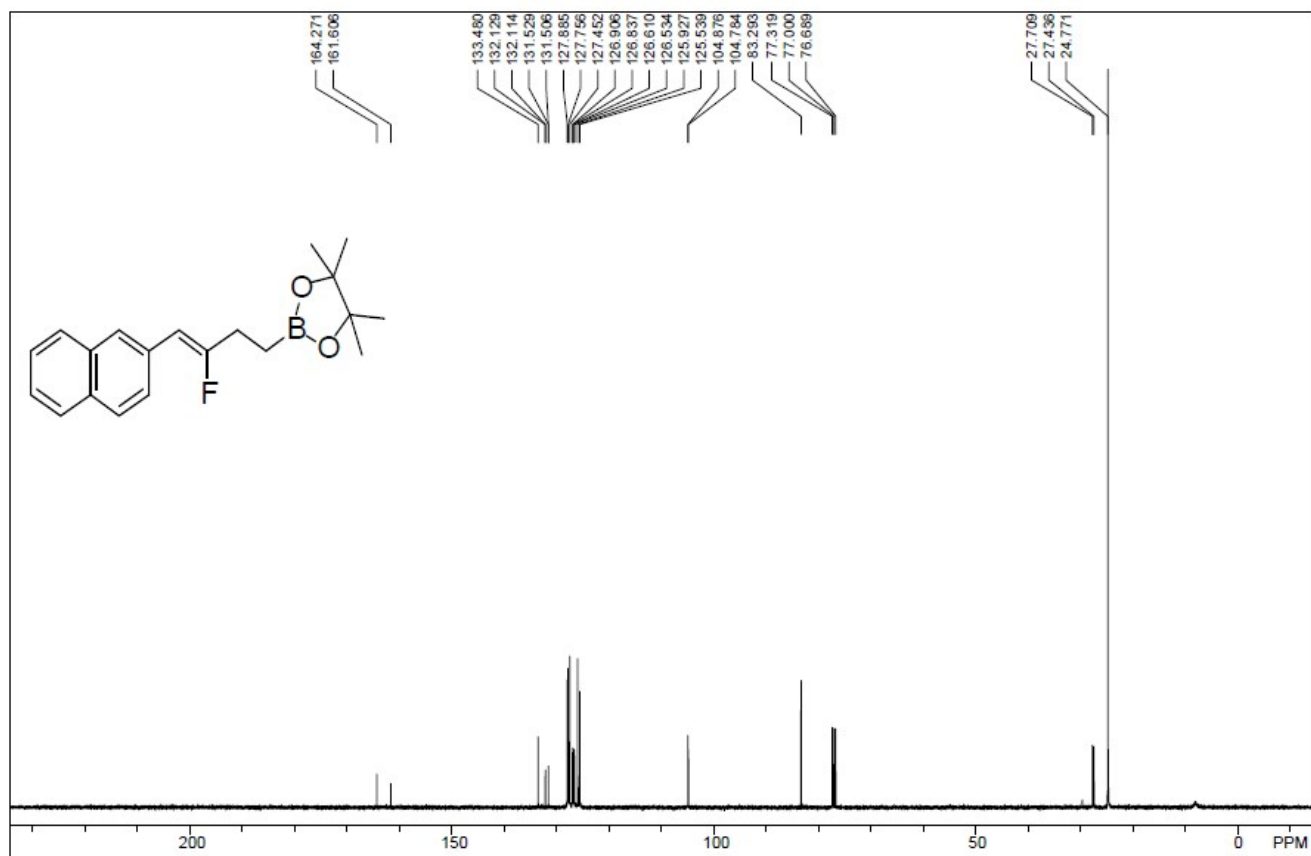

<sup>19</sup>F NMR spectrum of compound **31**

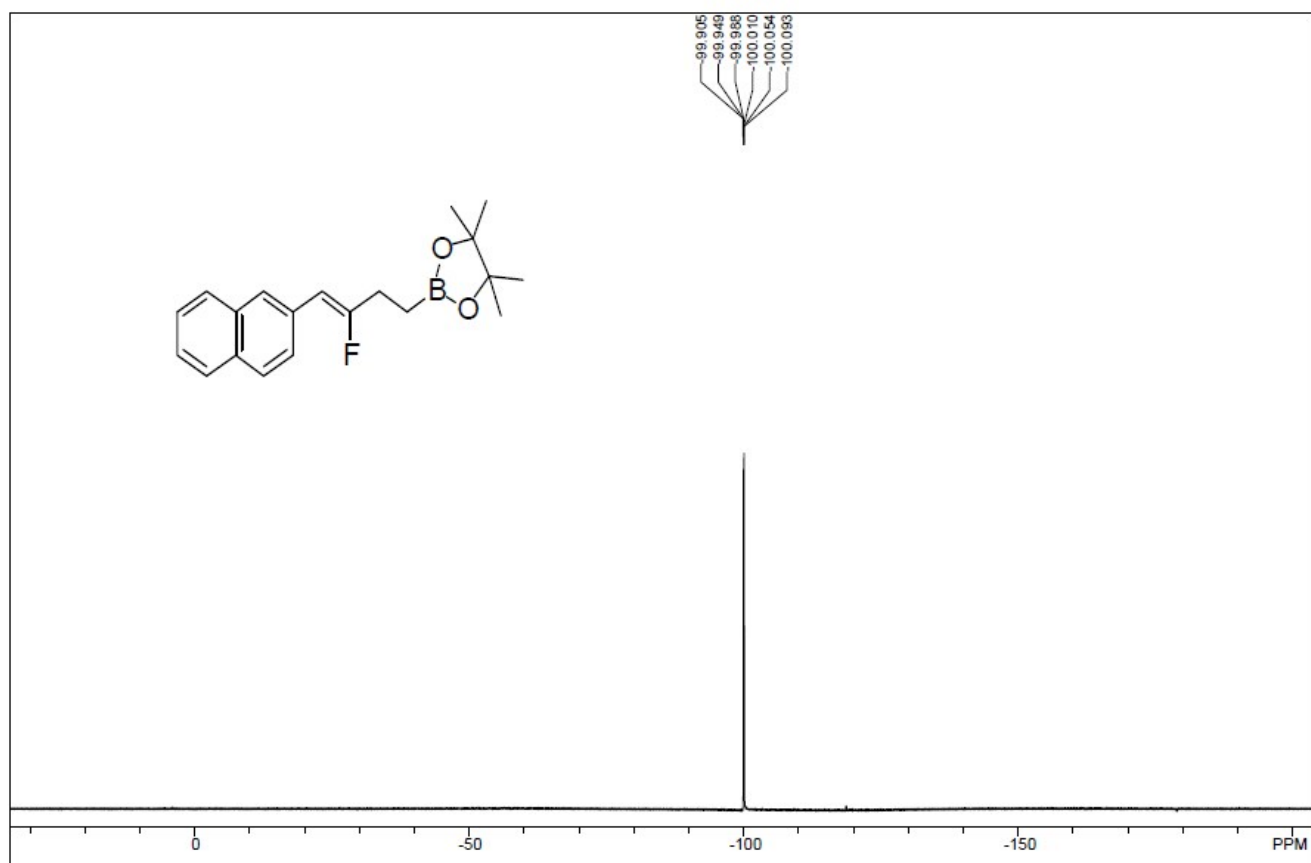

<sup>1</sup>H NMR spectrum of compound **3m**

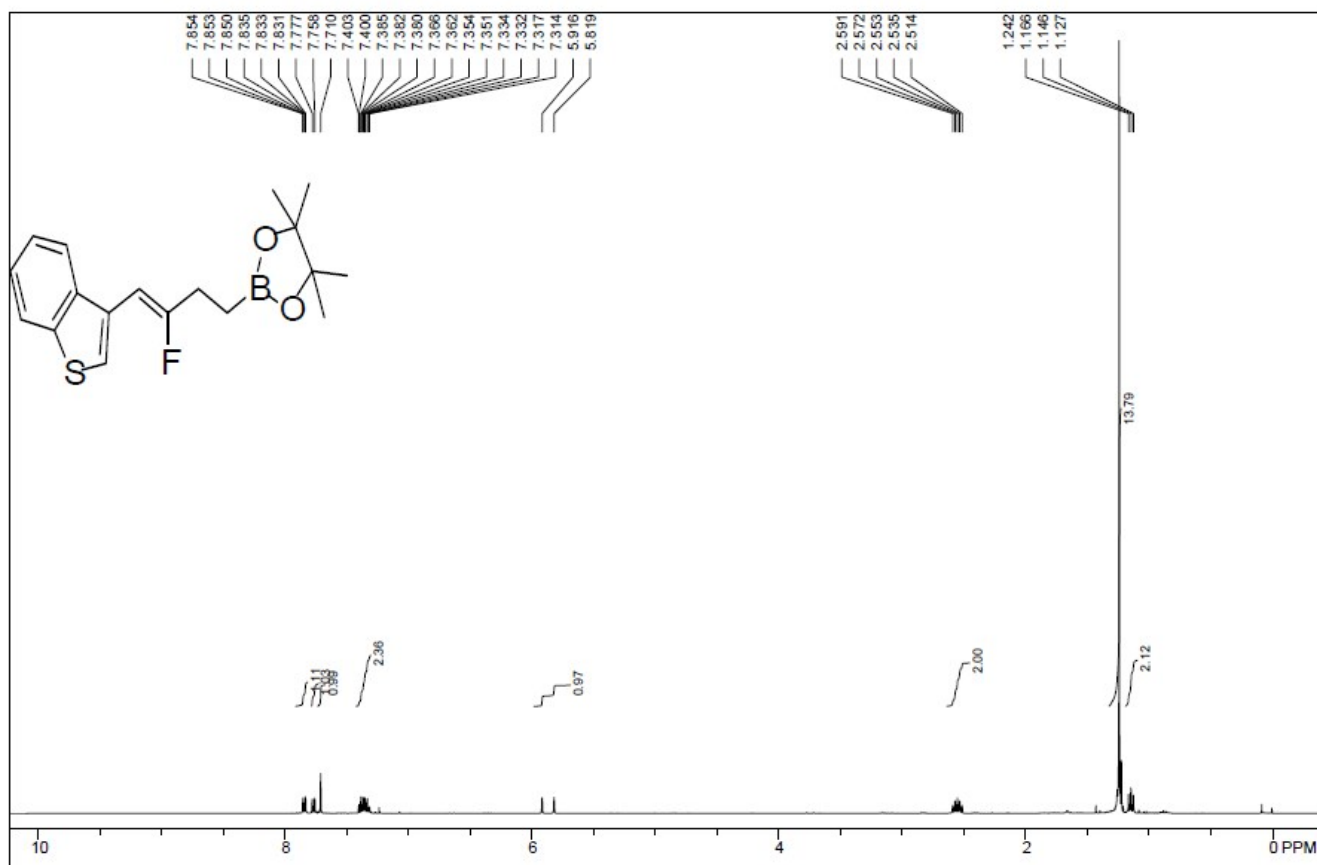

<sup>13</sup>C NMR spectrum of compound **3m**

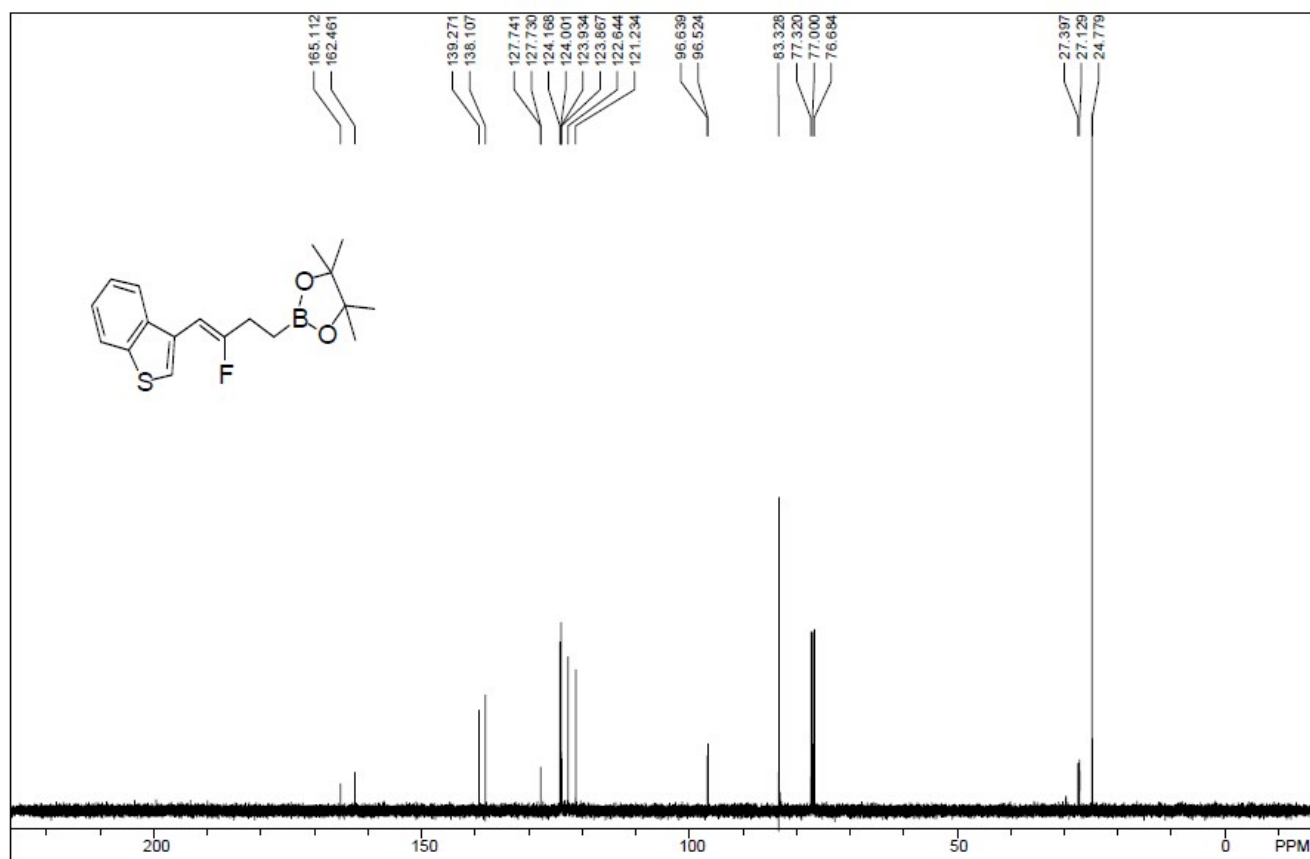



$^{19}\text{F}$  NMR spectrum of compound **3m**

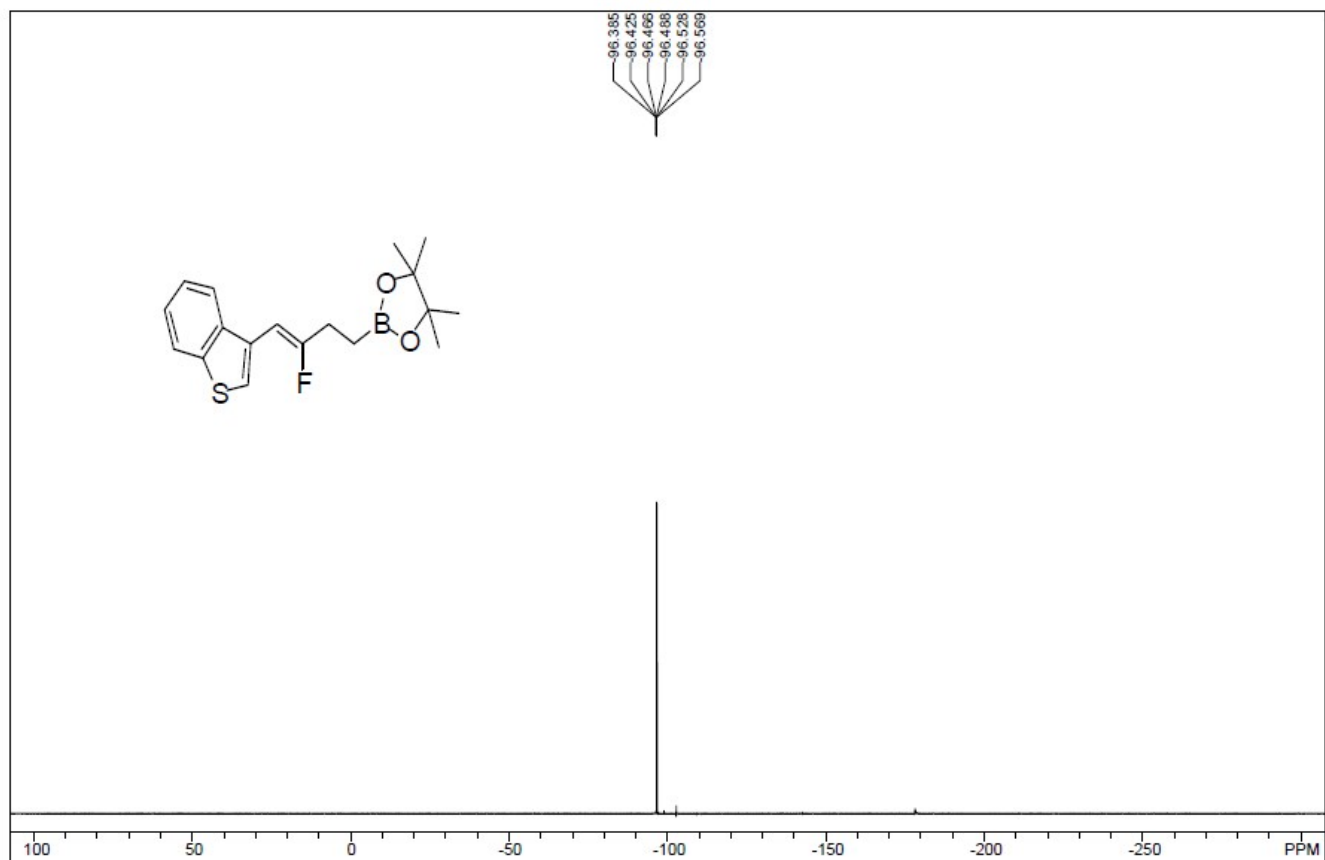

$^1\text{H}$  NMR spectrum of compound **3o**

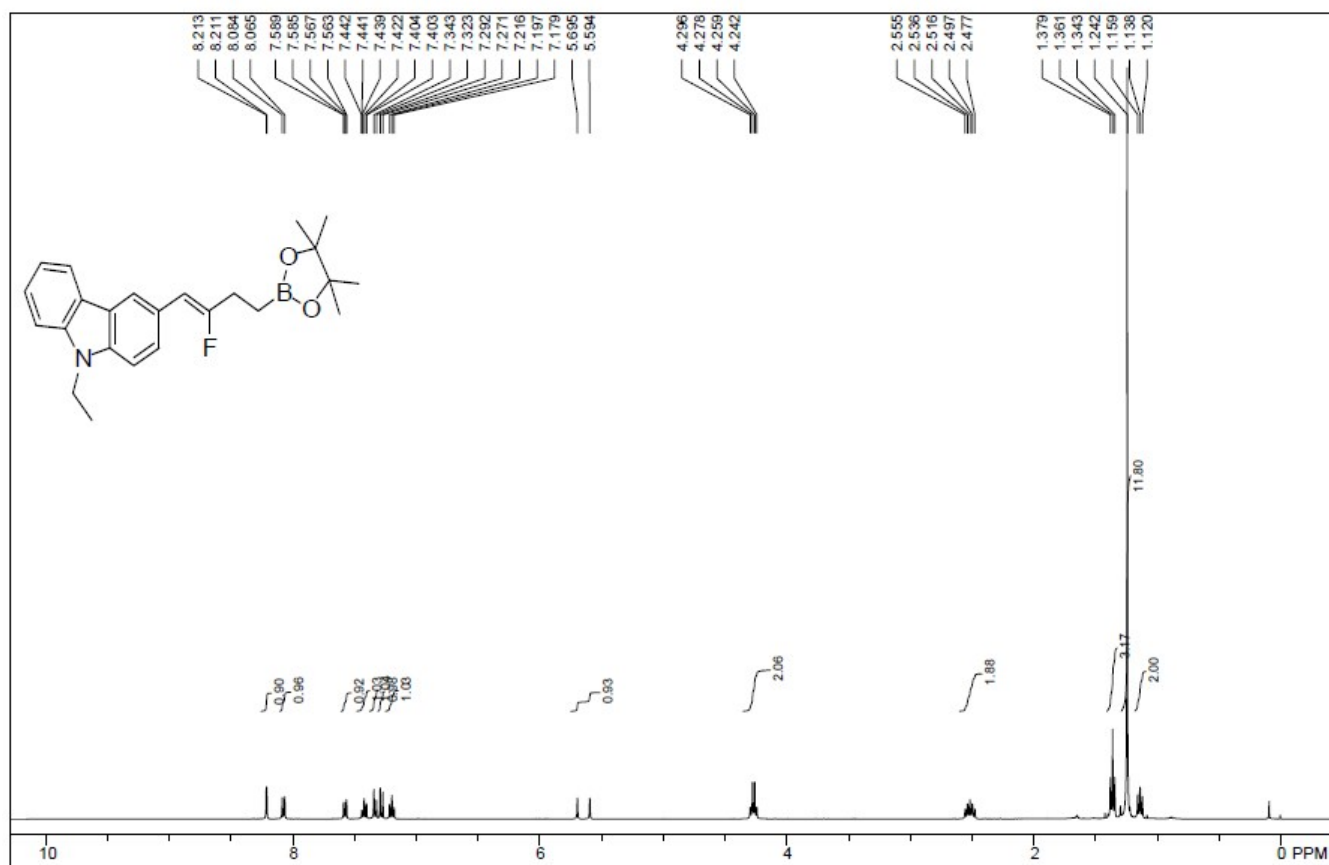

<sup>13</sup>C NMR spectrum of compound **3o**

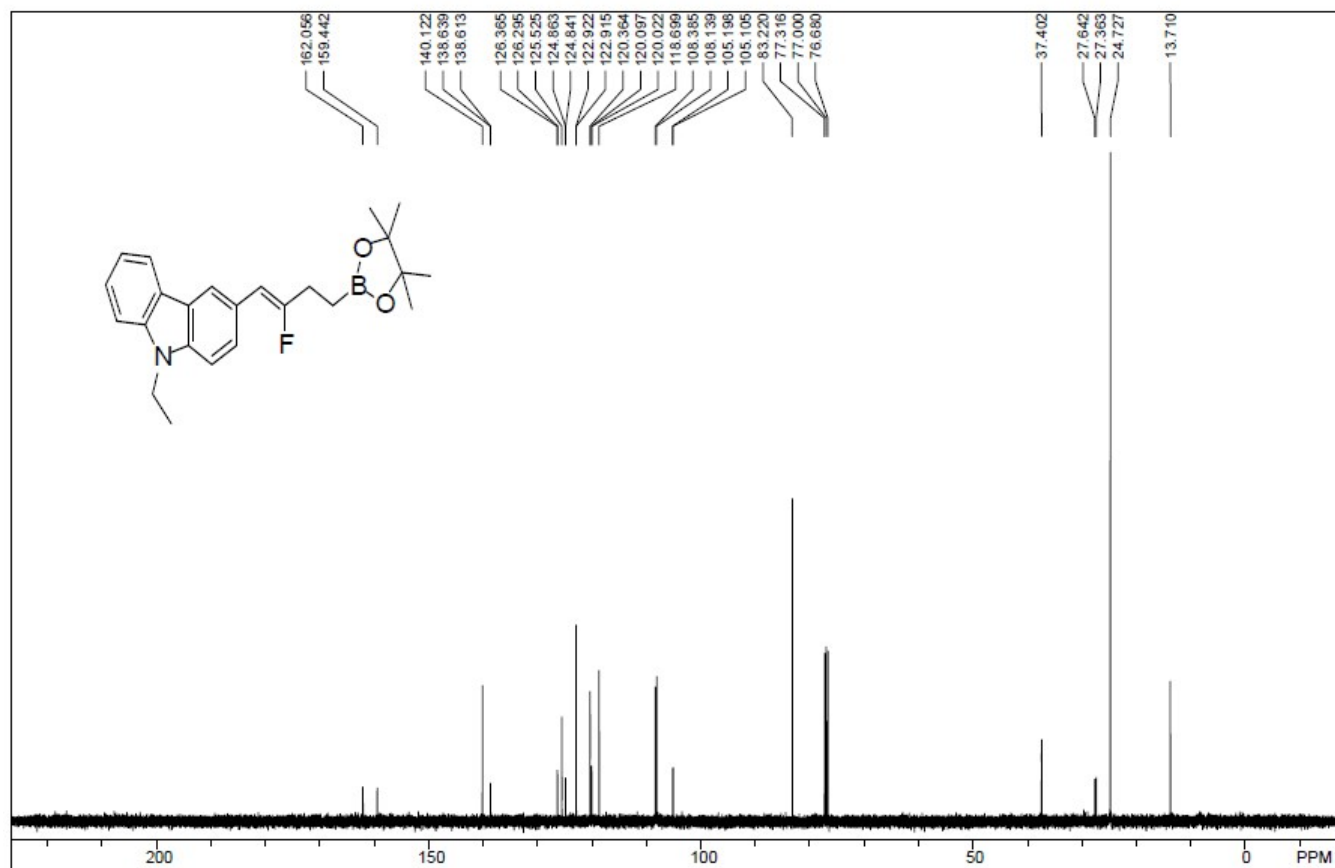

<sup>19</sup>F NMR spectrum of compound **3o**

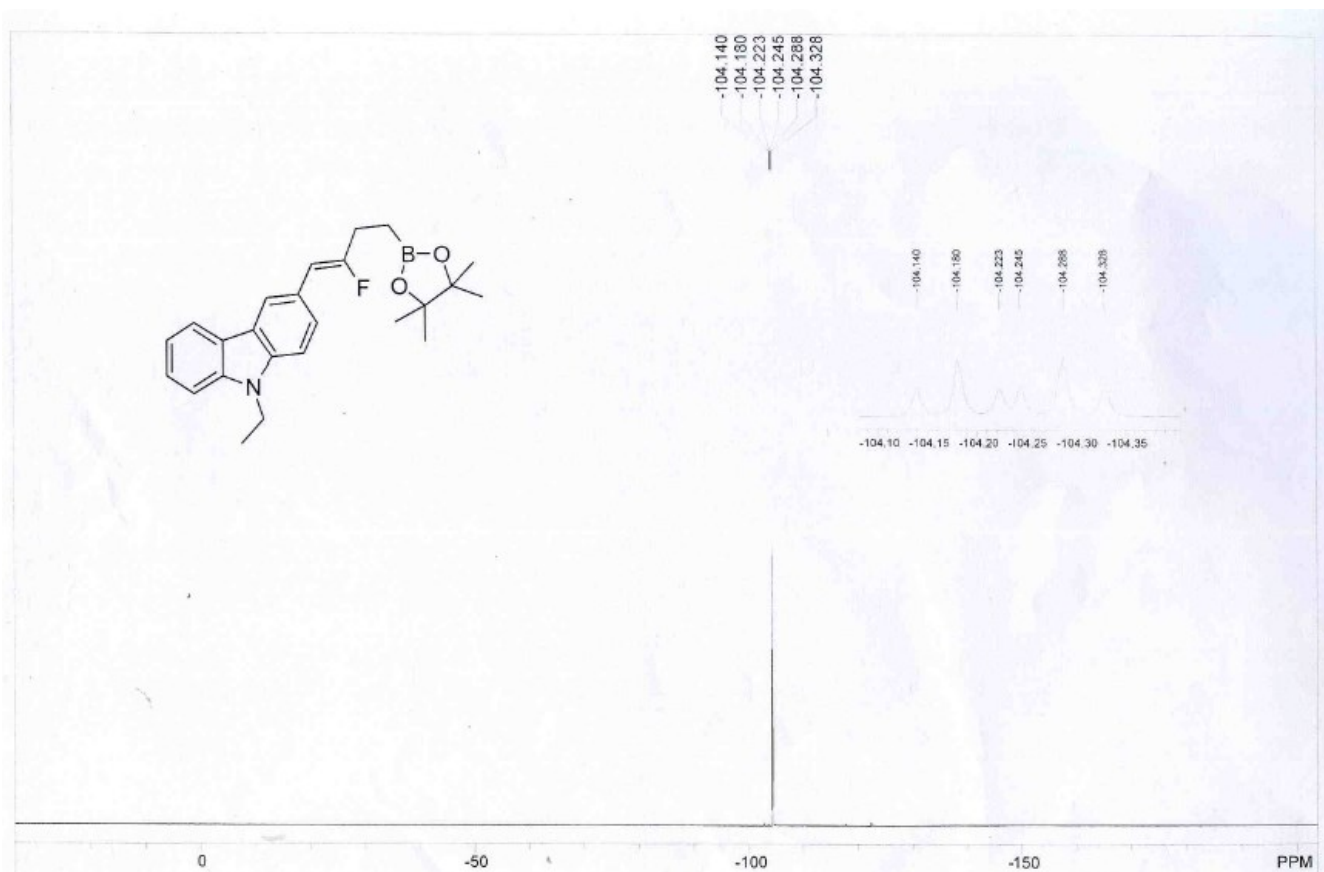

$^1\text{H}$  NMR spectrum of compound **4h**

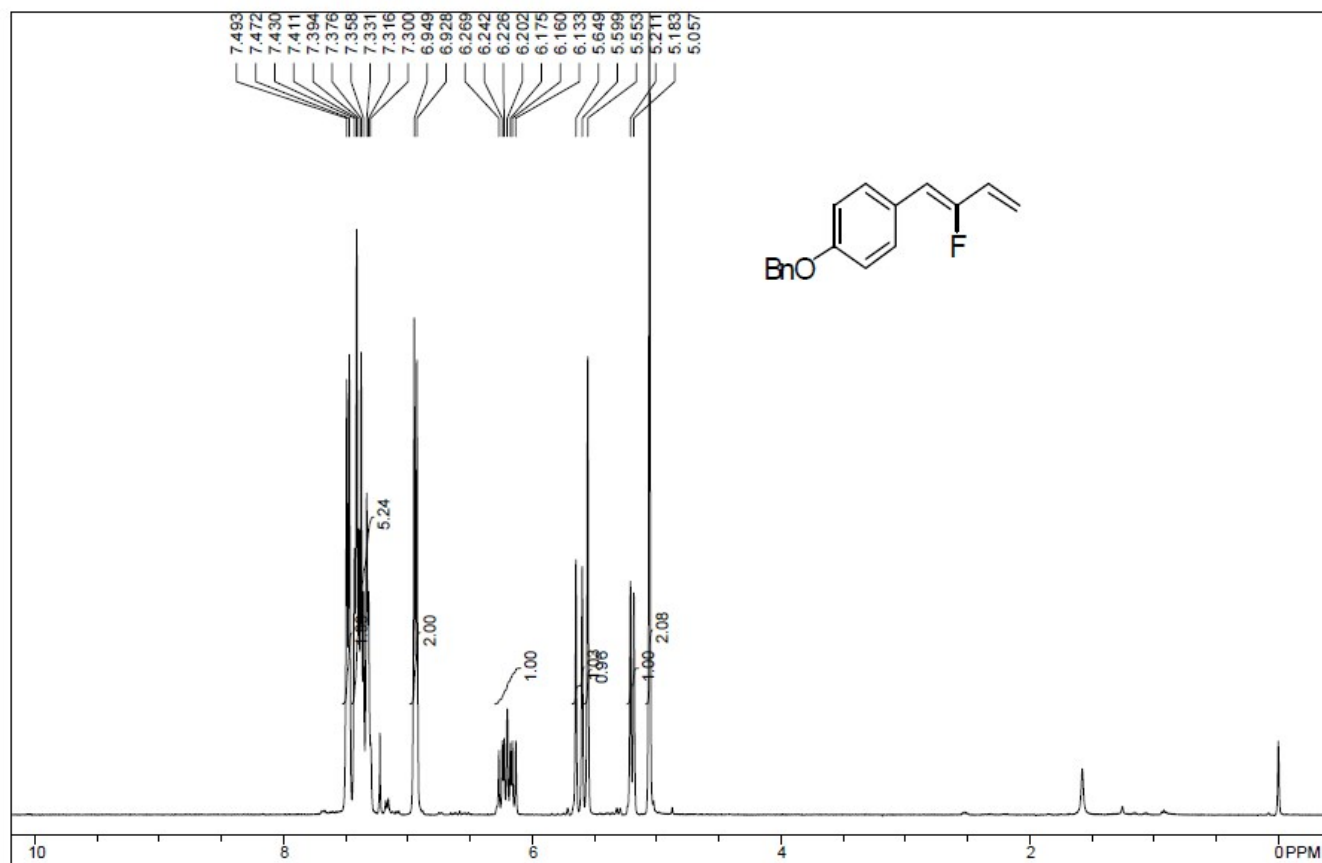

$^{13}\text{C}$  NMR spectrum of compound **4h**

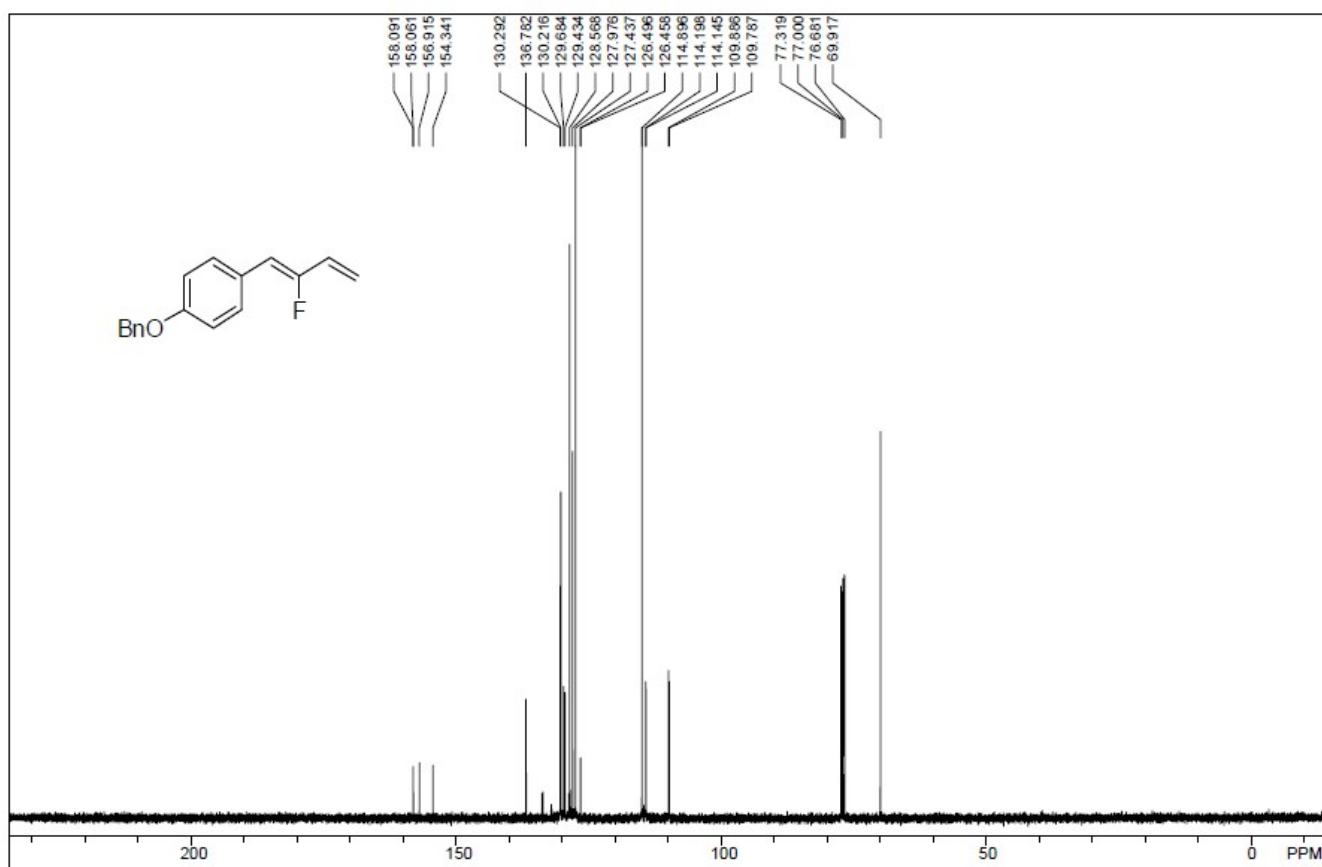

<sup>19</sup>F NMR spectrum of compound **4h**

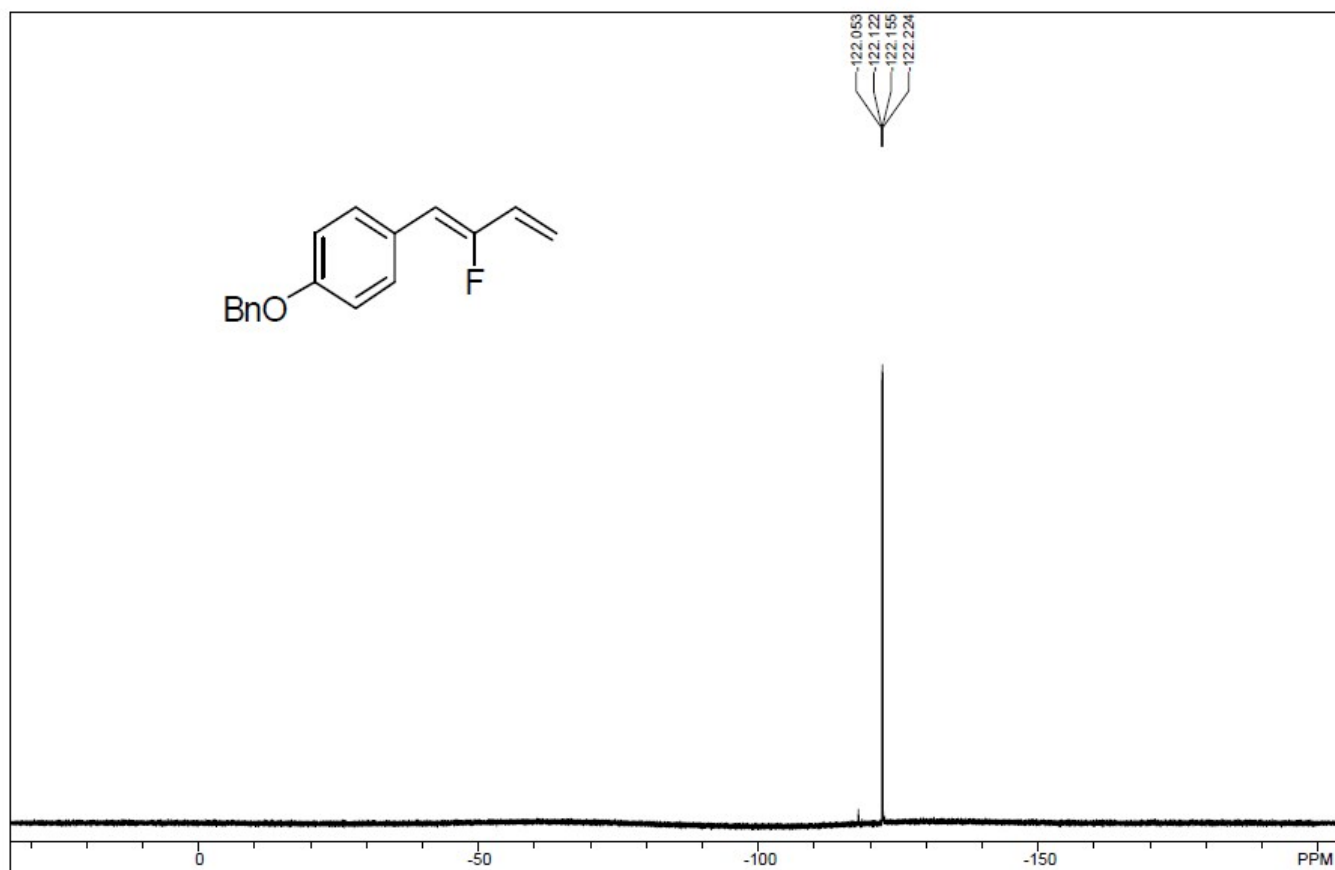

Supplement: d1cc02079j1.pdf [file d1cc02079j1.pdf]
